# Supplementary material for: Electrochemical oxidation-induced benzylic C(sp3)–H functionalization towards the atom-economic synthesis of oxazole heterocycles
Source: Royal Society of Chemistry journal article supplement (doi:10.1039/d2gc04782a), 2023-01-01
Supplement: d2gc04782a1.pdf [file d2gc04782a1.pdf]

## *Supporting Information*

### **Electrochemical oxidation-induced benzylic C(sp<sup>3</sup>)-H functionalization towards atom-economic synthesis of oxazole heterocycles**

Na Yang,<sup>a</sup> Anni Li,<sup>a</sup> Hui Gao,<sup>a,c</sup> Li-Mei Liao,<sup>a</sup> Yu-Ping Yang,<sup>a</sup> Pei-Long Wang\*,<sup>a,b</sup> and Hongji Li\*,<sup>a</sup>

<sup>a</sup> Key Laboratory of Green and Precise Synthetic Chemistry and Applications, Ministry of Education, School of Chemistry and Materials Science, Huaibei Normal University, Huaibei, Anhui 235000, P. R. China.

<sup>b</sup> Information College, Huaibei Normal University, Huaibei 235000, China.

<sup>c</sup> Key Laboratory for Chemistry and Molecular Engineering of Medicinal Resources, Guangxi Normal University, Guilin 541004, China.

#### **Table of Contents**

|           |                                                                                                          |     |
|-----------|----------------------------------------------------------------------------------------------------------|-----|
| <b>1.</b> | General Information .....                                                                                | S1  |
| <b>2.</b> | General Procedure for the Reactions.....                                                                 | S1  |
|           | 2.1 Graphical Guide for the Set-up .....                                                                 | S1  |
|           | 2.2 Typical Procedure for the Synthesis of <b>3a</b> .....                                               | S2  |
|           | 2.3 Effect of water on the electrochemical synthesis of <b>3a</b> .....                                  | S2  |
|           | 2.4 Typical Procedure for the Electrochemical Reaction Performed under N <sub>2</sub><br>Atmosphere..... | S3  |
|           | 2.5 Typical Procedure for the Scale-up Synthesis of<br><b>3a</b> .....                                   | S4  |
| <b>3.</b> | Mechanistic Experiments.....                                                                             | S5  |
|           | 3.1 Cyclic Voltammetry Studies<br>.....                                                                  | S5  |
|           | 3.2 Kinetic Isotope Effect Experiment.....                                                               | S5  |
|           | 3.3 Isotope-labeling Experiment.....                                                                     | S7  |
| <b>4.</b> | Characterization Data for the Products.....                                                              | S8  |
| <b>5.</b> | References .....                                                                                         | S31 |
| <b>6.</b> | NMR Spectra of the Products.....                                                                         | S32 |
| <b>7.</b> | Crystallographic Data for <b>3n</b> .....                                                                | S68 |

## 1. General Information

NMR spectra were recorded on Bruker-600 (600 MHz for  $^1\text{H}$ ; 151 MHz for  $^{13}\text{C}$ ).  $^1\text{H}$  NMR spectra were referenced relative to internal  $\text{Si}(\text{Me})_4$  (TMS) at  $\delta$  0.00 ppm or  $\text{CDCl}_3$  at  $\delta$  7.26 ppm.  $^{13}\text{C}$  NMR spectra were recorded at ambient temperature on Bruker-600 (151 MHz) spectrometers and are referenced relative to  $\text{CDCl}_3$  at  $\delta$  77.16 ppm. Data for  $^1\text{H}$ ,  $^{13}\text{C}$  NMR are recorded as follows: chemical shift ( $\delta$ , ppm), multiplicity (s = singlet, d = doublet, t = triplet, m = multiplet, q = quartet, quint = quintet, br = broad), integration, and coupling constant (Hz). High resolution mass spectra were recorded on P-SIMS-Gly of Bruker Daltonics Inc. using ESI-TOF (electrospray ionization-time of flight) and Agilent Technologies 7250 GCQTOF using EI-TOF. Amount of  $\text{H}_2\text{O}$  in  $\text{CH}_3\text{CN}$  was analyzed with 831 KF Coulometer (Metrohm).  $n\text{-Bu}_4\text{NBF}_4$ , phenylacetylene and  $\text{CH}_3\text{CN}$  were purchased from Energy Chemical Company and Taitan Chemical Company in China. Other substituted xanthenes and thioxanthenes were synthesized according to the known methods.<sup>1-2</sup> The commercially available  $\text{CH}_3\text{CN}$  contains about 2188.9 ppm of water that directly determined by 831 KF Coulometer.

## 2. General Procedure for the Reactions

### 2.1 Graphical Guide for the Set-up

As experimental setup, we used a platinum plate anode (10 mm $\times$ 10 mm $\times$ 0.3 mm) and a platinum plate cathode (10 mm $\times$ 10 mm $\times$ 0.3 mm), rubber stoppers, an undivided 15 mL single-necked flask, a DC adjustable power supply regulator (HY3005MT) (Made in China) and a magnetic stirrer.

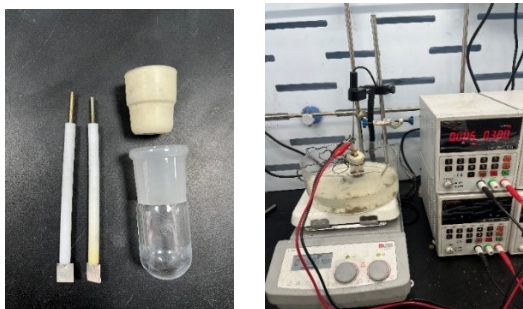

**Figure S1** Experiment setup for the oxidation-induced benzylic C(sp<sup>3</sup>)-H functionalization toward atom-economic synthesis of oxazole heterocycles

## 2.2 Typical Procedure for the Synthesis of 3a

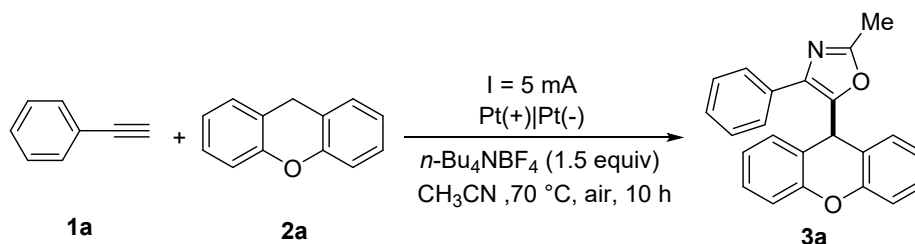

To an undivided cell (10 mL columnar round-bottom flask with a 24# mouth) fitted with a platinum anode (10 mm×10 mm×0.3 mm) and a platinum cathode (10 mm×10 mm×0.3 mm), the solid reagents xanthene (0.45 mmol) and *n*-Bu<sub>4</sub>NBF<sub>4</sub> (0.45 mmol) were added. Then, the liquid reagents phenylacetylene (0.3 mmol) and CH<sub>3</sub>CN (5 mL) were added in sequence via syringe. The electrolysis was carried out with constant current (5 mA) at 70 °C for 10 h. Then the solvent was evaporated to dryness under reduced pressure and the residue was purified by column chromatography on silica gel to give product **3a**.

## 2.3 Effect of Water on the Electrochemical Synthesis of Oxazole 3a

**Table S1.** Effect of water on the synthesis of oxazole **3a** <sup>a,b</sup>

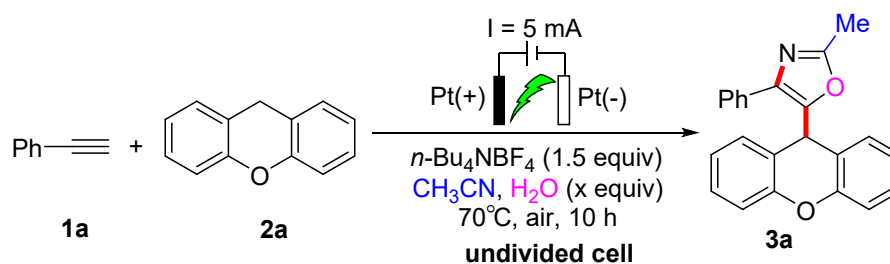

| Entry | H <sub>2</sub> O (x equiv) | Yield (%)       |
|-------|----------------------------|-----------------|
| 1     | none                       | trace           |
| 2     | 1                          | 80              |
| 3     | 1.6                        | 79 <sup>c</sup> |
| 4     | 3                          | 82              |
| 5     | 4                          | 70              |
| 6     | 5                          | 54              |

<sup>a</sup> Reaction conditions: **1** (0.3 mmol), **2a** (0.45 mmol), *n*-Bu<sub>4</sub>NBF<sub>4</sub> (1.5 equiv), *anhydrous* CH<sub>3</sub>CN (5.0 mL), H<sub>2</sub>O (x equiv), Pt plate (1 cm × 1 cm) anode, Pt plate (1 cm × 1 cm) cathode, constant

current = 5 mA, 70 °C, air, 10 h. <sup>b</sup> Isolated yields. <sup>c</sup> Commercially available CH<sub>3</sub>CN (Water content determined by 831 KF Coulometer: 2188.9 ppm, about 1.6 equiv. H<sub>2</sub>O in 5 mL of CH<sub>3</sub>CN)

## 2.4 Typical Procedure for the Electrochemical Reaction Performed under N<sub>2</sub> Atmosphere

As experimental setup, we used a platinum plate anode (10 mm×10 mm×0.3 mm) and a platinum plate cathode (10 mm×10 mm×0.3 mm), rubber stoppers, an undivided 15 mL Electrochemical Schlenk flask (LH-618-F) (LH LABWARE), a DC adjustable power supply regulator (HY3005MT) (Made in China) and a magnetic stirrer.

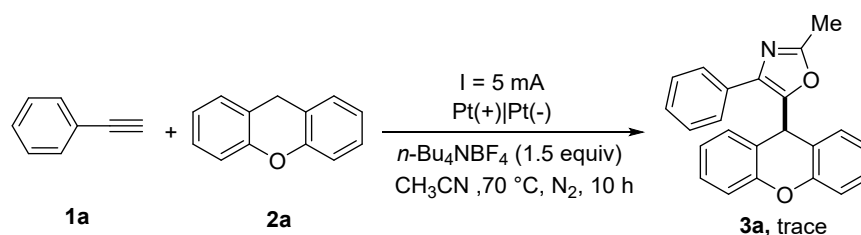

To an undivided cell (15 mL columnar Electrochemical round-bottom flask with a 24# mouth) fitted with a platinum anode (10 mm×10 mm×0.3 mm) and a platinum cathode (10 mm×10 mm×0.3 mm), the solid reagents xanthene (0.45 mmol) and *n*-Bu<sub>4</sub>NBF<sub>4</sub> (0.45 mmol) were added, the liquid reagents phenylacetylene (0.3 mmol) and Extra Dry CH<sub>3</sub>CN (5 mL) were added in sequence via syringe. Then, degassing with liquid nitrogen removes water as well as oxygen from CH<sub>3</sub>CN. The electrolysis was carried out with constant current (5 mA) at 70 °C for 10 h, and almost no product was observed therein.

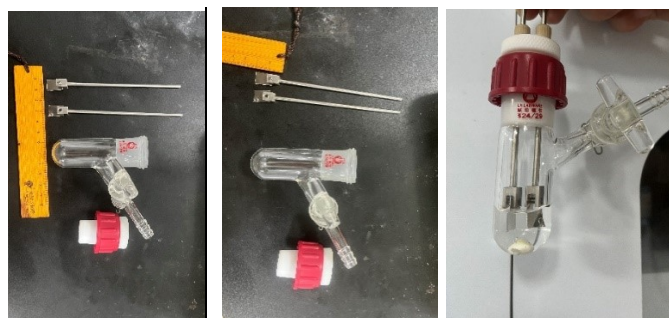

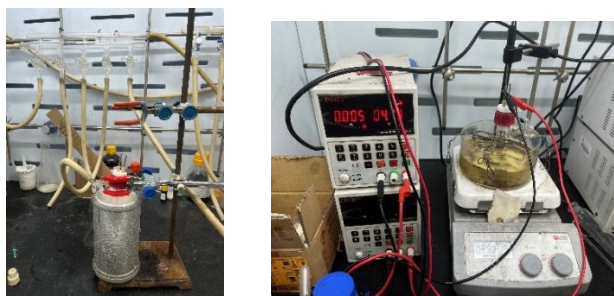

**Figure S2** Experiment setup for electrochemical reaction performed under  $N_2$ .  
**2.5 Gram-scale Synthesis of 3a**

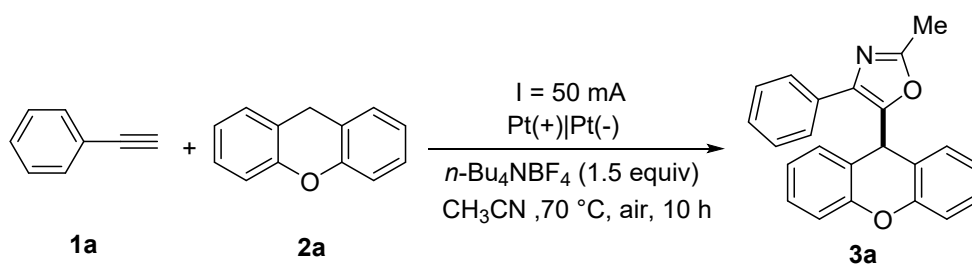

To an 100 mL oven-dried undivided three neck bottle fitted with a platinum anode (15 mm×15 mm×0.3 mm) and a platinum cathode (15 mm×15 mm×0.3 mm), the solid reagents xanthene (819.3 mg, 4.5 mmol, 1.5 equiv) and  $n\text{-Bu}_4\text{NBF}_4$  (1.48g, 4.5 mmol, 1.5 equiv) were added. Then, the liquid reagents phenylacetylene (306.2 mg, 3 mmol) and  $\text{CH}_3\text{CN}$  (50 mL) were added in sequence via syringe. The electrolysis was carried out with constant current (50 mA) at  $70^\circ\text{C}$  for 10 h. Then the solvent was evaporated to dryness under reduced pressure and the residue was purified by column chromatography on silica gel to give product **3a** (579.9 mg, 57% yield).

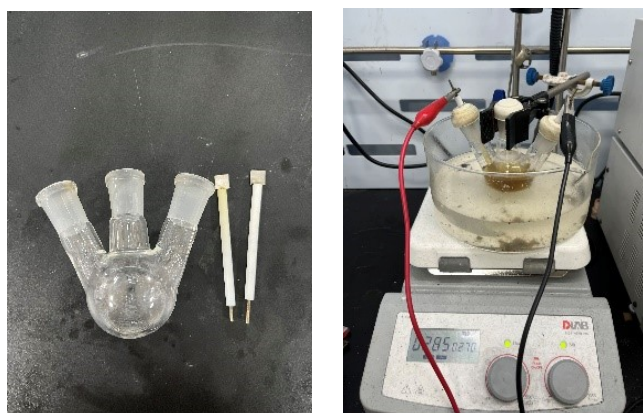

**Figure S3** Experiment setup for the gram-scale synthesis of **3a**.

### 3. Mechanistic Experiments

#### 3.1 Cyclic Voltammetry Studies

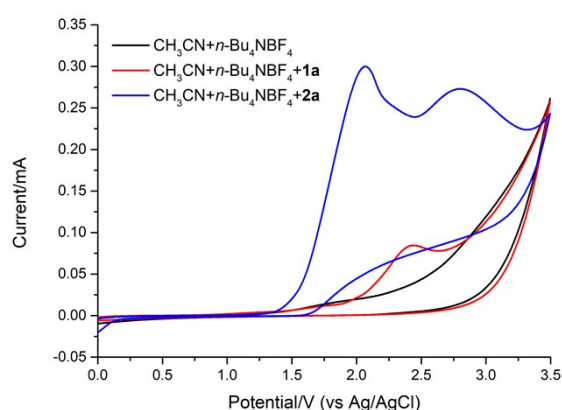

**Figure S4** The cyclic voltammograms recorded in CH<sub>3</sub>CN with 0.1 M *n*-Bu<sub>4</sub>NBF<sub>4</sub> as the supporting electrolyte [**1a** (10 mM), **2a** (10 mM)].

Cyclic voltammetry was performed in a three electrode cell connected to a Schlenk line at room temperature. The working electrode was a glassy carbon electrode, and the counter electrode was a platinum electrode. The reference was an Ag/AgCl. 10 mL of CH<sub>3</sub>CN containing 0.1 M *n*-Bu<sub>4</sub>NBF<sub>4</sub> were poured into the electrochemical cell in all experiments. The scan rate is 0.1 V/s, ranging from 0 V to 3.5 V. The test concentrations of **1a** and **2a** are 10 mM.

#### 3.2 Kinetic Isotope Effect Experiment

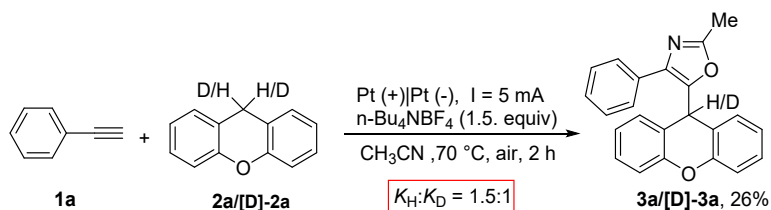

Phenylacetylene (**1a**, 30.6 mg, 0.3 mmol, 1.0 equiv), xanthene (**2a**, 41.0 mg, 0.225 mmol), [D]-xanthene (**[D]-2a**, 41.5 mg, 0.225 mmol), *n*-Bu<sub>4</sub>NBF<sub>4</sub> (148.2 mg, 0.45 mmol, 1.5 equiv), CH<sub>3</sub>CN (5 mL) was sequentially added to an undivided cell (10 mL columnar round-bottom flask with a 24# mouth) fitted with a platinum anode (10 mm×10 mm×0.3 mm) and a platinum cathode (10 mm×10 mm×0.3 mm). The reaction mixture was stirred and electrolyzed at a constant current of 5 mA under air at 70 °C for 2 h. After that, the mixture in reaction tube was detected by TLC. The crude product was purified by flash chromatography (silica gel, petroleum ether/ethyl acetate = 20:1), to give the desired product **3a**/**[D]-3a** in 26% yield.

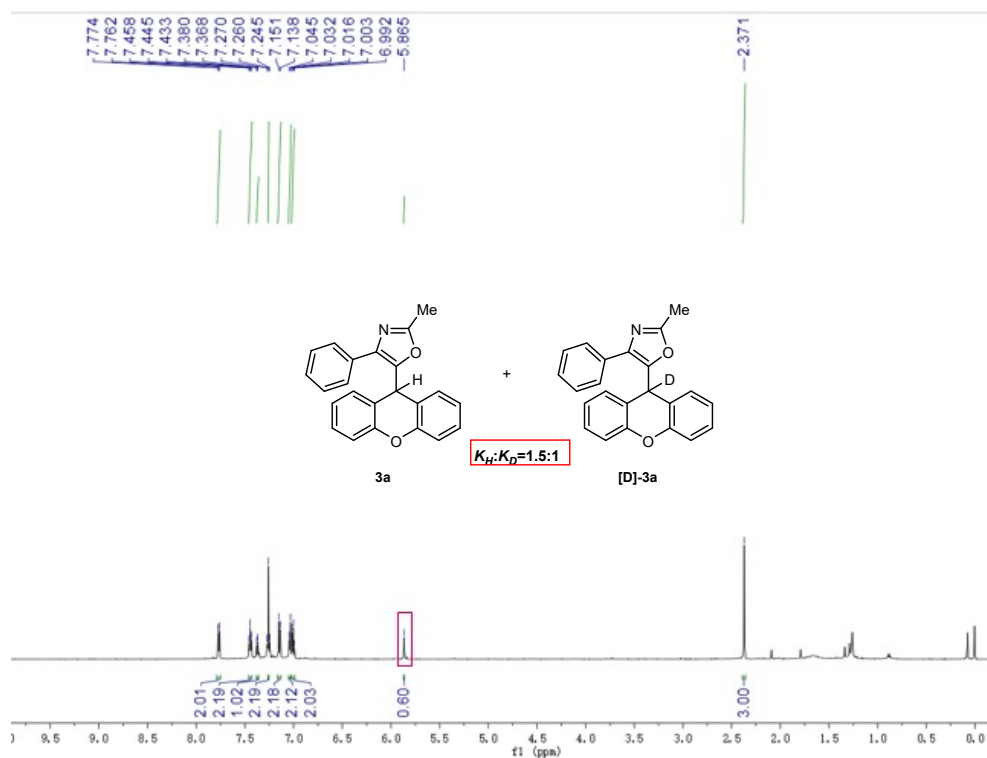

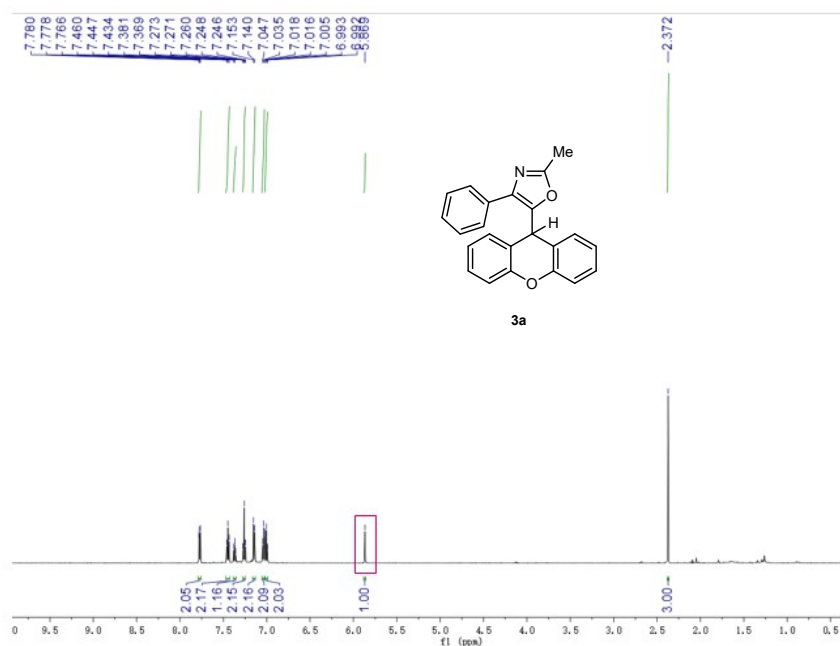

Figure S5 NMR spectra of **3a**/[D]-**3a**

### 3.3 Isotope-labeling Experiment

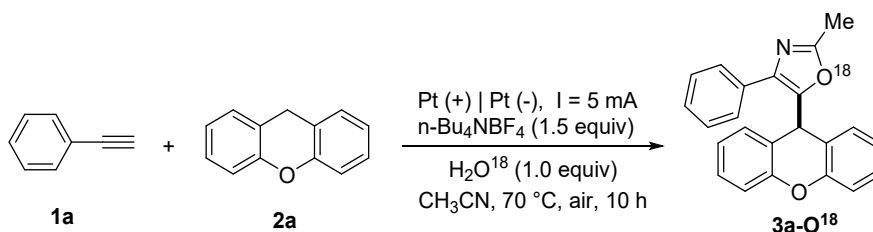

Phenylacetylene (**1a**, 30.6 mg, 0.3 mmol, 1.0 equiv), xanthene (**2a**, 82.0 mg, 4.5 mmol, 1.5 equiv), *n*-Bu<sub>4</sub>NBF<sub>4</sub> (148.0 mg, 0.3 mmol, 1.5 equiv), CH<sub>3</sub>CN (5 mL), H<sub>2</sub>O<sup>18</sup> (6.0 mg, 0.3 mmol, 1.0 equiv) was sequentially added to an undivided cell (10 mL columnar round-bottom flask with a 24# mouth) fitted with a platinum anode (10 mm×10 mm×0.3 mm) and a platinum cathode (10 mm×10 mm×0.3 mm). The reaction mixture was stirred and electrolyzed at a constant current of 5 mA under air at 70 °C for 10 h. When the reaction was complete, the reaction solution was concentrated in vacuum. The resulting crude mixture was purified by flash column chromatography to give the desired product **3a-O<sup>18</sup>**, which could be detected by HRMS (data of [M+H]<sup>+</sup> are showed).



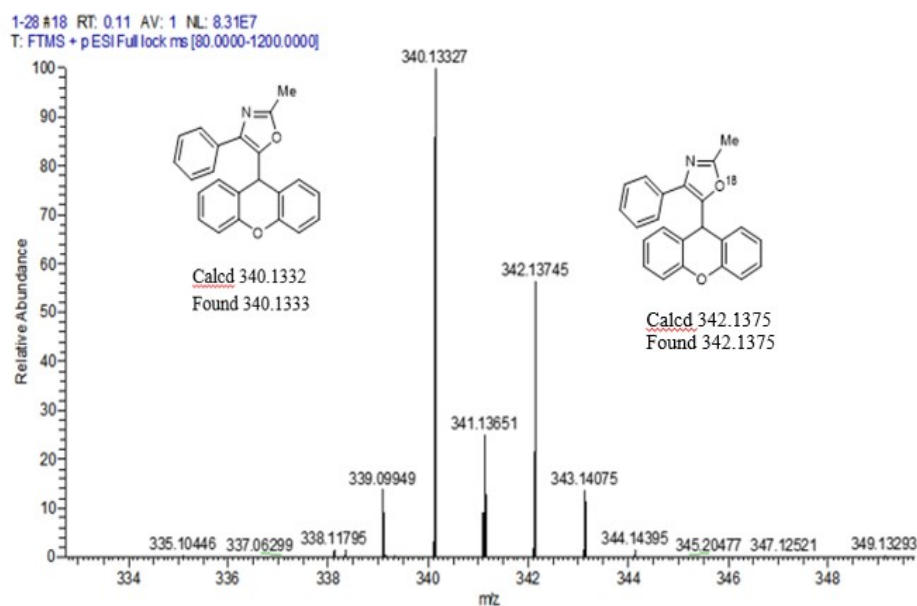

Figure S6 HRMS Analysis Reports for **3a**/ [O<sup>18</sup>]-**3a**

#### 4. Characterization Data for the Products

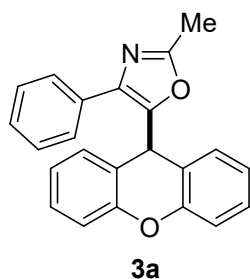

##### 2-Methyl-4-phenyl-5-(9H-xanthen-9-yl)oxazole (**3a**)

Prepared following general procedure and the reaction mixture was purified by flash column chromatography with petroleum ether and ethylacetate (PE/EA=20:1) to afford the product **3a** (80.3 mg, 79% yield).

White solid; m.p.: 165~166 °C.

<sup>1</sup>H NMR (600 MHz, CDCl<sub>3</sub>) δ 7.78–7.76 (m, 2H), 7.45 (t, *J* = 7.8 Hz, 2H), 7.37 (t, *J* = 7.2 Hz, 1H), 7.27–7.24 (m, 2H), 7.15 (d, *J* = 7.8 Hz, 2H), 7.04 (d, *J* = 7.2 Hz, 2H), 7.02–6.99 (m, 2H), 5.87 (s, 1H), 2.37 (s, 3H).

$^{13}\text{C}$  NMR (151 MHz,  $\text{CDCl}_3$ )  $\delta$  161.0, 151.2, 147.3, 137.0, 131.7, 128.9, 128.7, 128.6, 128.1, 127.1, 123.3, 120.3, 116.9, 34.9, 14.0.

HRMS (ESI) calcd. for  $\text{C}_{23}\text{H}_{18}\text{NO}_2^+$  ( $[\text{M}+\text{H}]^+$ ): 340.1332, found: 340.1333.

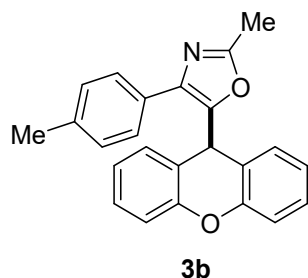

### 2-Methyl-4-(*p*-tolyl)-5-(9*H*-xanthen-9-yl)oxazole (**3b**)

Prepared following general procedure and the reaction mixture was purified by flash column chromatography with petroleum ether and ethylacetate (PE/EA=20:1) to afford the product **3b** (77.3 mg, 73% yield).

White solid; m.p.: 163~164 °C.

$^1\text{H}$  NMR (600 MHz,  $\text{CDCl}_3$ )  $\delta$  7.67 (d,  $J = 7.8$  Hz, 2H), 7.26–7.24 (m, 4H), 7.14 (d,  $J = 7.8$  Hz, 2H), 7.04 (d,  $J = 7.2$  Hz, 2H), 7.01–7.00 (m, 2H), 5.86 (s, 1H), 2.40 (s, 3H), 2.36 (s, 3H).

$^{13}\text{C}$  NMR (151 MHz,  $\text{CDCl}_3$ )  $\delta$  160.9, 151.2, 146.9, 137.9, 137.0, 129.5, 128.8, 128.7, 128.6, 126.9, 123.3, 120.4, 116.9, 34.9, 21.3, 14.1

HRMS (ESI) calcd. for  $\text{C}_{24}\text{H}_{20}\text{NO}_2^+$  ( $[\text{M}+\text{H}]^+$ ): 354.1489, found 354.1488.

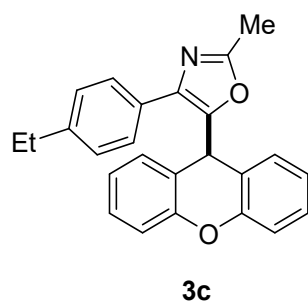

### 4-(4-Ethylphenyl)-2-methyl-5-(9*H*-xanthen-9-yl)oxazole (**3c**)

Prepared following general procedure and the reaction mixture was purified by flash column chromatography with petroleum ether and ethylacetate (PE/EA = 20:1) to afford the product **3c** (78.1 mg, 71% yield).

White solid; m.p.: 169~170 °C.

<sup>1</sup>H NMR (600 MHz, CDCl<sub>3</sub>) δ 7.70 (d, *J* = 7.8 Hz, 2H), 7.29–7.24 (m, 4H), 7.14 (d, *J* = 7.8 Hz, 2H), 7.04 (d, *J* = 7.2 Hz, 2H), 7.02–6.99 (m, 2H), 5.87 (s, 1H), 2.72–2.68 (q, *J* = 7.8 Hz, 2H), 2.36 (s, 3H), 1.27 (t, *J* = 7.8 Hz, 3H)

<sup>13</sup>C NMR (151 MHz, CDCl<sub>3</sub>) δ 159.8, 151.2, 145.8, 143.2, 136.1, 128.0, 127.7, 127.5, 127.3, 126.0, 122.2, 119.4, 115.8, 33.9, 27.6, 14.5, 13.0.

HRMS (ESI) calcd. for C<sub>25</sub>H<sub>22</sub>NO<sub>2</sub><sup>+</sup> ([M+H]<sup>+</sup>): 368.1645, found: 368.1649.

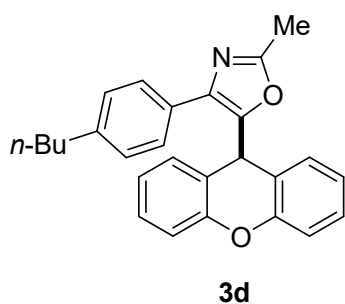

#### 4-(4-Butylphenyl)-2-methyl-5-(9H-xanthen-9-yl)oxazole (**3d**)

Prepared following general procedure and the reaction mixture was purified by flash column chromatography with petroleum ether and ethylacetate (PE/EA = 20:1) to afford the product **3d** (88.9 mg, 75% yield).

White solid; m.p.: 173~174 °C.

<sup>1</sup>H NMR (600 MHz, CDCl<sub>3</sub>) δ 7.70 (d, *J* = 8.4 Hz, 2H), 7.27–7.24 (m, 4H), 7.15 (d, *J* = 7.8 Hz, 2H), 7.05 (d, *J* = 7.8 Hz, 2H), 7.01–6.99 (m, 2H), 5.87 (s, 1H), 2.67–2.64 (m, 2H), 2.36 (s, 3H), 1.65–1.62 (m, 2H), 1.40–1.36 (m, 2H), 0.95 (t, *J* = 7.2 Hz, 3H).

<sup>13</sup>C NMR (151 MHz, CDCl<sub>3</sub>) δ 161.0, 151.3, 146.9, 143.0, 137.2, 129.1, 129.0, 128.8, 128.7, 127.0, 123.4, 120.5, 117.0, 35.5, 35.0, 33.6, 22.4, 14.1, 14.1.

HRMS (ESI) calcd. for  $C_{27}H_{26}NO_2^+$  ( $[M+H]^+$ ): 396.1958, found: 396.1960.

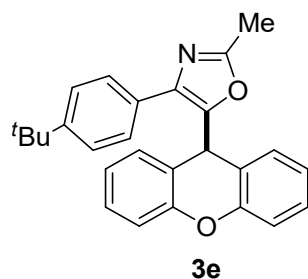

#### 4-(4-(*tert*-Butyl)phenyl)-2-methyl-5-(9*H*-xanthen-9-yl)oxazole (**3e**)

Prepared following general procedure and the reaction mixture was purified by flash column chromatography with petroleum ether and ethylacetate (PE/EA = 20:1) to afford the product **3e** (90.1 mg, 76% yield).

White solid; m.p.: 153~154 °C.

$^1H$  NMR (600 MHz,  $CDCl_3$ )  $\delta$  7.73 (d,  $J = 8.4$  Hz, 2H), 7.47 (d,  $J = 9.0$  Hz, 2H), 7.26–7.24 (m, 2H), 7.15 (dd,  $J = 8.4, 0.6$  Hz, 2H), 7.05 (d,  $J = 7.2$  Hz, 2H), 7.02–6.99 (m, 2H), 5.88 (s, 1H), 2.36 (s, 3H), 1.36 (s, 9H).

$^{13}C$  NMR (151 MHz,  $CDCl_3$ )  $\delta$  161.0, 151.4, 151.2, 146.9, 137.2, 128.9, 128.8, 128.7, 126.8, 125.9, 123.4, 120.6, 117.0, 35.0, 34.8, 31.4, 14.2.

HRMS (ESI) calcd. for  $C_{27}H_{26}NO_2^+$  ( $[M+H]^+$ ): 396.1958, found: 396.1961.

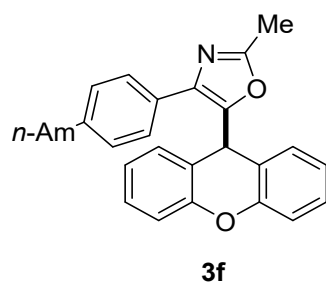

#### 2-Methyl-4-(4-pentylphenyl)-5-(9*H*-xanthen-9-yl)oxazole (**3f**)

Prepared following general procedure and the reaction mixture was purified by flash column chromatography with petroleum ether and ethylacetate (PE/EA = 20:1) to afford the product **3f** (88.9 mg, 75% yield).

White solid; m.p.: 179~180 °C.

<sup>1</sup>H NMR (600 MHz, CDCl<sub>3</sub>) δ 7.68 (d, *J* = 8.4 Hz, 2H), 7.27–7.23 (m, 4H), 7.14 (d, *J* = 8.4 Hz, 2H), 7.04 (d, *J* = 7.2 Hz, 2H), 7.02–6.98 (m, 2H), 5.86 (s, 1H), 2.64 (t, *J* = 7.8 Hz, 2H), 2.36 (s, 3H), 1.67–1.62 (m, 2H), 1.37–1.32 (m, 4H), 0.90 (t, *J* = 7.2 Hz, 3H).

<sup>13</sup>C NMR (151 MHz, CDCl<sub>3</sub>) δ 161.0, 151.4, 146.9, 143.1, 137.3, 129.1, 129.0, 128.8, 128.7, 127.1, 123.4, 120.6, 117.0, 35.8, 35.0, 31.6, 31.12, 22.7, 14.2, 14.2.

HRMS (ESI) calcd. for C<sub>28</sub>H<sub>28</sub>NO<sub>2</sub><sup>+</sup> ([M+H]<sup>+</sup>): 410.2114, found: 410.2116.

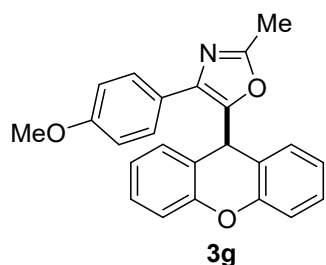

#### 4-(4-Methoxyphenyl)-2-methyl-5-(9H-xanthen-9-yl)oxazole (**3g**)

Prepared following general procedure and the reaction mixture was purified by flash column chromatography with petroleum ether and ethylacetate (PE/EA = 10:1) to afford the product **3g** (88.4 mg, 80% yield).

White solid; m.p.: 160~161 °C.

<sup>1</sup>H NMR (600 MHz, CDCl<sub>3</sub>) δ 7.76 (d, *J* = 7.2 Hz, 2H), 7.44 (t, *J* = 7.8 Hz, 2H), 7.36 (t, *J* = 7.2 Hz, 1H), 7.27–7.22 (m, 2H), 7.03 (d, *J* = 7.2 Hz, 1H), 7.01–6.98 (m, 1H), 6.94 (t, *J* = 7.8 Hz, 1H), 6.85 (d, *J* = 7.8 Hz, 1H), 6.64 (d, *J* = 7.8 Hz, 1H), 5.85 (s, 1H), 3.96 (s, 3H), 2.35 (s, 3H).

<sup>13</sup>C NMR (151 MHz, CDCl<sub>3</sub>) δ 160.9, 159.6, 151.4, 146.6, 136.9, 128.8, 128.7, 128.5, 124.4, 123.4, 120.6, 117.0, 114.4, 55.5, 35.0, 14.2.

HRMS (ESI) calcd. for C<sub>24</sub>H<sub>20</sub>NO<sub>3</sub><sup>+</sup> ([M+H]<sup>+</sup>): 370.1438, found 370.1439.

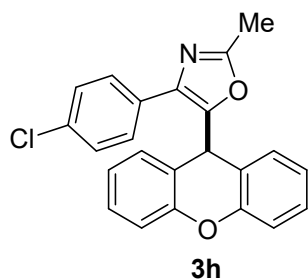

#### 4-(4-Chlorophenyl)-2-methyl-5-(9*H*-xanthen-9-yl)oxazole (**3h**)

Prepared following general procedure and the reaction mixture was purified by flash column chromatography with petroleum ether and ethylacetate (PE/EA = 20:1) to afford the product **3h** (48.1 mg, 43% yield).

White solid; m.p.: 154~155 °C.

<sup>1</sup>H NMR (600 MHz, CDCl<sub>3</sub>) δ 7.67 (d, *J* = 8.4 Hz, 2H), 7.39 (d, *J* = 8.4 Hz, 2H), 7.27–7.24 (m, 2H), 7.14 (d, *J* = 7.8 Hz, 2H), 7.00 (d, *J* = 4.2 Hz, 4H), 5.81 (s, 1H), 2.37 (s, 3H).

<sup>13</sup>C NMR (151 MHz, CDCl<sub>3</sub>) δ 161.2, 151.3, 147.8, 136.0, 134.0, 130.3, 129.1, 128.9, 128.7, 128.5, 123.5, 120.2, 117.1, 35.2, 14.1.

HRMS (ESI) calcd. for C<sub>23</sub>H<sub>17</sub>ClNO<sub>2</sub><sup>+</sup> ([M+H]<sup>+</sup>): 374.0942, found: 374.0944.

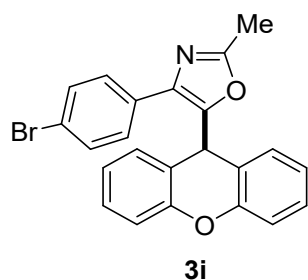

#### 4-(4-Bromophenyl)-2-methyl-5-(9*H*-xanthen-9-yl)oxazole (**3i**)

Prepared following general procedure and the reaction mixture was purified by flash column chromatography with petroleum ether and ethylacetate (PE/EA = 20:1) to afford the product **3i** (62.6 mg, 50% yield).

White solid; m.p.: 158~159 °C.

$^1\text{H NMR}$  (600 MHz,  $\text{CDCl}_3$ )  $\delta$  7.61 (d,  $J = 8.4$  Hz, 2H), 7.55 (d,  $J = 8.4$  Hz, 2H), 7.28–7.24 (m, 2H), 7.14 (d,  $J = 8.4$  Hz, 2H), 7.00 (d,  $J = 4.2$  Hz, 4H), 5.81 (s, 1H), 2.37 (s, 3H).

$^{13}\text{C NMR}$  (151 MHz,  $\text{CDCl}_3$ )  $\delta$  161.2, 151.3, 147.8, 136.0, 134.0, 130.3, 129.1, 128.9, 128.7, 128.5, 123.5, 120.2, 117.1, 35.2, 14.1.

**HRMS** (ESI) calcd. for  $\text{C}_{23}\text{H}_{17}\text{BrNO}_2^+$  ( $[\text{M}+\text{H}]^+$ ): 418.0437, found: 418.0437.

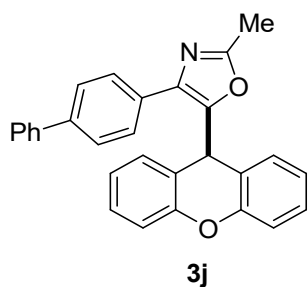

#### 4-((1,1'-Biphenyl)-4-yl)-2-methyl-5-(9H-xanthen-9-yl)oxazole (**3j**)

Prepared following general procedure and the reaction mixture was purified by flash column chromatography with petroleum ether and ethylacetate (PE/EA = 20:1) to afford the product **3j** (81.0 mg, 65% yield).

White solid; m.p.: 170~171 °C.

$^1\text{H NMR}$  (600 MHz,  $\text{CDCl}_3$ )  $\delta$  7.85 (d,  $J = 7.8$  Hz, 2H), 7.67 (d,  $J = 8.4$  Hz, 2H), 7.63 (d,  $J = 7.8$  Hz, 2H), 7.47–7.44 (m, 2H), 7.36 (t,  $J = 7.2$  Hz, 1H), 7.28–7.26 (m, 2H), 7.15 (d,  $J = 8.4$  Hz, 2H), 7.07 (d,  $J = 7.5$  Hz, 2H), 7.02–7.00 (m, 2H), 5.92 (s, 1H), 2.38 (s, 3H).

$^{13}\text{C NMR}$  (151 MHz,  $\text{CDCl}_3$ )  $\delta$  161.0, 151.2, 147.4, 140.8, 140.6, 136.6, 130.7, 128.8, 128.7, 128.7, 127.5, 127.4, 127.0, 123.3, 120.3, 116.9, 35.0, 14.1.

**HRMS** (ESI) calcd. for  $\text{C}_{29}\text{H}_{22}\text{NO}_2^+$  ( $[\text{M}+\text{H}]^+$ ): 416.1645, found: 416.1645.

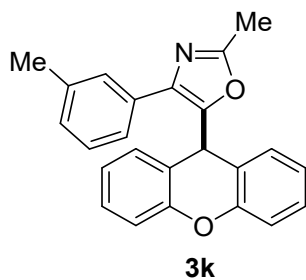

### 2-Methyl-4-(*m*-tolyl)-5-(9*H*-xanthen-9-yl)oxazole (**3k**)

Prepared following general procedure and the reaction mixture was purified by flash column chromatography with petroleum ether and ethylacetate (PE/EA = 20:1) to afford the product **3k** (72.0 mg, 68% yield).

White solid; m.p.: 143~144 °C.

<sup>1</sup>H NMR (600 MHz, CDCl<sub>3</sub>) δ 7.59 (s, 1H), 7.55 (d, *J* = 7.8 Hz, 1H), 7.32 (t, *J* = 7.8 Hz, 1H), 7.27–7.24 (m, 2H), 7.18 (d, *J* = 7.8 Hz, 1H), 7.14 (dd, *J* = 7.8, 0.6 Hz, 2H), 7.04 (d, *J* = 7.2 Hz, 2H), 7.02–6.99 (m, 2H), 5.88 (s, 1H), 2.41 (s, 3H), 2.37 (s, 3H).

<sup>13</sup>C NMR (151 MHz, CDCl<sub>3</sub>) δ 161.0, 151.3, 147.4, 138.7, 137.2, 131.7, 129.0, 128.8, 128.8, 128.7, 128.0, 124.1, 123.4, 120.5, 117.0, 35.0, 21.6, 14.2.

HRMS (ESI) calcd. for C<sub>24</sub>H<sub>20</sub>NO<sub>2</sub><sup>+</sup> ([M+H]<sup>+</sup>): 354.1488, found: 354.1488.

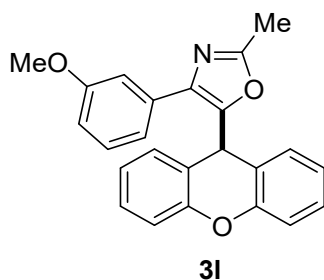

### 4-(3-Methoxyphenyl)-2-methyl-5-(9*H*-xanthen-9-yl)oxazole (**3l**)

Prepared following general procedure and the reaction mixture was purified by flash column chromatography with petroleum ether and ethylacetate (PE/EA = 10:1) to afford the product **3l** (79.7 mg, 72% yield).

White solid; m.p.: 149~151 °C.



$^1\text{H NMR}$  (600 MHz,  $\text{CDCl}_3$ )  $\delta$  7.36–7.34 (m, 2H), 7.31 (d,  $J = 1.8$  Hz, 1H), 7.27–7.24 (m, 2H), 7.14 (dd,  $J = 7.8, 1.2$  Hz, 2H), 7.04 (d,  $J = 6.6$  Hz, 2H), 7.01–6.99 (m, 2H), 6.93–6.90 (m, 1H), 5.88 (s, 1H), 3.84 (s, 3H), 2.37 (s, 3H).

$^{13}\text{C NMR}$  (151 MHz,  $\text{CDCl}_3$ )  $\delta$  161.1, 156.8, 151.3, 149.2, 133.4, 131.7, 129.7, 129.3, 128.5, 123.2, 121.1, 121.0, 120.9, 116.8, 111.1, 55.4, 35.0, 14.3.

**HRMS** (ESI) calcd. for  $\text{C}_{24}\text{H}_{20}\text{NO}_3^+$  ( $[\text{M}+\text{H}]^+$ ): 370.1438, found: 370.1438.

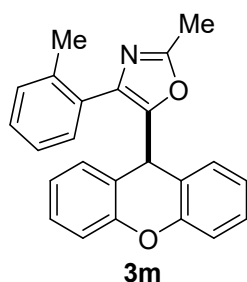

### 2-Methyl-4-(*o*-tolyl)-5-(9*H*-xanthen-9-yl)oxazole (**3m**)

Prepared following general procedure and the reaction mixture was purified by flash column chromatography with petroleum ether and ethylacetate (PE/EA = 20:1) to afford the product **3m** (66.7 mg, 63% yield).

White solid; m.p.: 142~143 °C.

$^1\text{H NMR}$  (600 MHz,  $\text{CDCl}_3$ )  $\delta$  7.29 (d,  $J = 7.2, 4.2$  Hz, 2H), 7.28 (d,  $J = 1.2$  Hz, 1H), 7.25–7.22 (m, 2H), 7.21–7.18 (m, 1H), 7.09 (d,  $J = 7.8$  Hz, 2H), 7.05 (d,  $J = 6.0$  Hz, 2H), 7.03–7.00 (m, 2H), 5.40 (s, 1H), 2.37 (s, 3H), 2.35 (s, 3H).

$^{13}\text{C NMR}$  (151 MHz,  $\text{CDCl}_3$ )  $\delta$  160.4, 151.6, 148.7, 138.1, 136.9, 131.0, 130.6, 130.2, 128.8, 128.6, 125.8, 123.4, 120.8, 117.0, 34.8, 20.4, 14.3.

**HRMS** (ESI) calcd. for  $\text{C}_{24}\text{H}_{20}\text{NO}_2^+$  ( $[\text{M}+\text{H}]^+$ ): 354.1489, found: 354.1489

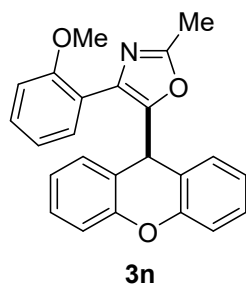

#### 4-(2-Methoxyphenyl)-2-methyl-5-(9*H*-xanthen-9-yl)oxazole (**3n**)

Prepared following general procedure and the reaction mixture was purified by flash column chromatography with petroleum ether and ethylacetate (PE/EA = 20:1) to afford the product **3n** (74.2 mg, 67% yield).

White solid; m.p.: 163~164 °C.

<sup>1</sup>H NMR (600 MHz, CDCl<sub>3</sub>) δ 7.60 (dd, *J* = 7.8, 1.8 Hz, 1H), 7.37–7.34 (m, 1H), 7.24–7.21 (m, 2H), 7.11–7.09 (m, 3H), 7.08–7.05 (m, 2H), 7.00–6.96 (m, 3H), 5.66 (s, 1H), 3.81 (s, 3H), 2.36 (s, 3H).

<sup>13</sup>C NMR (151 MHz, CDCl<sub>3</sub>) δ 161.0, 156.7, 151.3, 149.2, 133.4, 131.6, 129.7, 129.2, 128.4, 123.2, 121.1, 121.0, 120.8, 116.7, 111.1, 55.4, 35.0, 14.2.

HRMS (ESI) calcd. for C<sub>24</sub>H<sub>20</sub>NO<sub>3</sub><sup>+</sup> ([M+H]<sup>+</sup>): 370.1438, found: 370.1438.

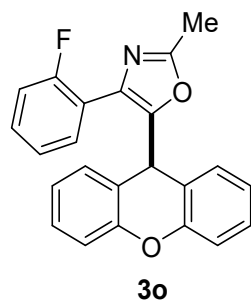

#### 4-(2-Fluorophenyl)-2-methyl-5-(9*H*-xanthen-9-yl)oxazole (**3o**)

Prepared following general procedure and the reaction mixture was purified by flash column chromatography with petroleum ether and ethylacetate (PE/EA = 20:1) to afford the product **3o** (51.4 mg, 48% yield).

White solid; m.p.: 137~138 °C.

<sup>1</sup>H NMR (600 MHz, CDCl<sub>3</sub>) δ 7.55–7.50 (m, 2H), 7.45–7.40 (m, 1H), 7.29–7.27 (m, 1H), 7.17–7.16 (m, 2H), 7.07 (dd, *J* = 8.4, 0.6 Hz, 2H), 7.03 (d, *J* = 6.6 Hz, 2H), 7.02–7.01 (m, 2H), 5.87 (s, 1H), 2.39 (s, 3H).

<sup>13</sup>C NMR (151 MHz, CDCl<sub>3</sub>) δ 161.2, 151.4, 147.4, 137.1, 131.8, 130.5, 129.0, 128.8, 128.8, 128.2, 127.2, 123.4, 120.4, 117.0, 116.5, 35.0, 14.1.

<sup>19</sup>F NMR (565 MHz, CDCl<sub>3</sub>) δ –112.4.

HRMS (ESI) calcd. for C<sub>23</sub>H<sub>17</sub>FNO<sub>2</sub><sup>+</sup> ([M+H]<sup>+</sup>): 358.1238, found: 358.1238.

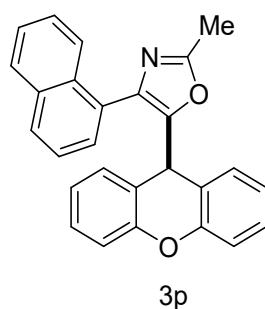

### 2-Methyl-4-(naphthalen-1-yl)-5-(9H-xanthen-9-yl)oxazole (**3p**)

Prepared following general procedure and the reaction mixture was purified by flash column chromatography with petroleum ether and ethylacetate (PE/EA = 20:1) to afford the product **3p** (77.2 mg, 66% yield).

White solid; m.p.: 181~182 °C.

<sup>1</sup>H NMR (600 MHz, CDCl<sub>3</sub>) δ 8.05–8.02 (m, 1H), 7.93–7.90 (m, 2H), 7.59 (d, *J* = 6.6, 0.6 Hz, 1H), 7.55–7.52 (m, 2H), 7.50 (d, *J* = 7.2 Hz, 1H), 7.23–7.19 (m, 2H), 7.09 (d, *J* = 8.4 Hz, 2H), 7.05 (d, *J* = 7.2 Hz, 2H), 7.00–6.96 (m, 2H), 5.47 (s, 1H), 2.44 (s, 3H).

<sup>13</sup>C NMR (151 MHz, CDCl<sub>3</sub>) δ 160.8, 151.4, 149.8, 135.8, 133.9, 132.6, 129.2, 128.9, 128.8, 128.5, 128.3, 127.8, 126.6, 126.1, 125.9, 125.2, 123.3, 120.4, 116.8, 34.8, 14.2.

HRMS (ESI) calcd. for C<sub>27</sub>H<sub>20</sub>NO<sub>2</sub><sup>+</sup> ([M+H]<sup>+</sup>): 390.1489, found: 390.1487.

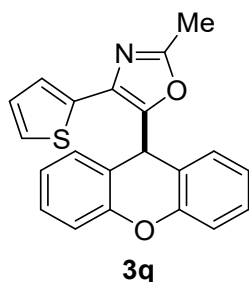

### 2-Methyl-4-(thiophen-2-yl)-5-(9*H*-xanthen-9-yl)oxazole (**3q**)

Prepared following general procedure and the reaction mixture was purified by flash column chromatography with petroleum ether and ethylacetate (PE/EA = 20:1) to afford the product **3q** (63.2 mg, 61% yield).

White solid; m.p.: 140~141 °C.

<sup>1</sup>H NMR (600 MHz, CDCl<sub>3</sub>) δ 7.64 (dd, *J* = 3.0, 1.2 Hz, 1H), 7.48 (dd, *J* = 4.8, 1.2 Hz, 1H), 7.42–7.40 (m, 1H), 7.27–7.24 (m, 2H), 7.15 (dd, *J* = 8.4, 1.2 Hz, 2H), 7.04 (d, *J* = 7.2 Hz, 2H), 7.01–6.99 (m, 2H), 5.86 (s, 1H), 2.35 (s, 3H).

<sup>13</sup>C NMR (151 MHz, CDCl<sub>3</sub>) δ 161.0, 151.3, 147.1, 133.0, 132.8, 128.9, 128.8, 126.6, 126.3, 123.4, 122.2, 120.2, 117.0, 35.1, 14.1.

HRMS (ESI) calcd. for C<sub>21</sub>H<sub>16</sub>NO<sub>2</sub>S<sup>+</sup> ([M+H]<sup>+</sup>): 346.0896, found 346.0897.

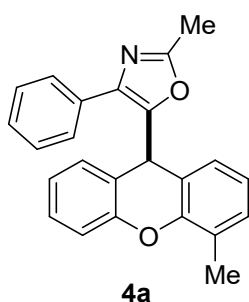

### 2-Methyl-5-(4-methyl-9*H*-xanthen-9-yl)-4-phenyloxazole (**4a**)

Prepared following general procedure and the reaction mixture was purified by flash column chromatography with petroleum ether and ethylacetate (PE/EA = 20:1) to afford the product **4a** (72.0 mg, 68% yield).

White solid; m.p.: 157~158°C.

$^1\text{H NMR}$  (600 MHz,  $\text{CDCl}_3$ )  $\delta$  7.77 (d,  $J = 7.2$  Hz, 2H), 7.44 (t,  $J = 7.8$  Hz, 2H), 7.36 (t,  $J = 7.8$  Hz, 1H), 7.18 (d,  $J = 7.8$  Hz, 1H), 7.11 (d,  $J = 7.1$  Hz, 1H), 7.07–6.99 (m, 3H), 6.90–6.86 (m, 2H), 5.85 (s, 1H), 2.43 (s, 3H), 2.37 (s, 3H).

$^{13}\text{C NMR}$  (151 MHz,  $\text{CDCl}_3$ )  $\delta$  161.1, 151.5, 149.6, 147.6, 137.0, 131.9, 130.0, 128.0, 128.7, 128.6, 128.2, 127.3, 127.3, 126.2, 123.3, 122.8, 120.6, 120.0, 117.1, 35.2, 16.2, 14.2.

**HRMS** (ESI) calcd. for  $\text{C}_{24}\text{H}_{20}\text{NO}_2^+$  ( $[\text{M}+\text{H}]^+$ ): 354.1489, found: 354.1489.

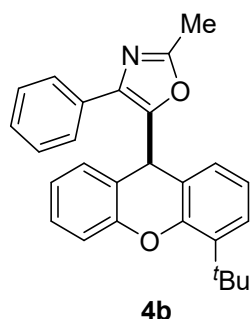

#### 5-(4-(*tert*-Butyl)-9*H*-xanthen-9-yl)-2-methyl-4-phenyloxazol (**4b**)

Prepared following general procedure and the reaction mixture was purified by flash column chromatography with petroleum ether and ethylacetate (PE/EA = 20:1) to afford the product **4b** (77.1 mg, 65% yield).

White solid; m.p.: 149~150 °C.

$^1\text{H NMR}$  (600 MHz,  $\text{CDCl}_3$ )  $\delta$  7.74 (d,  $J = 7.2$  Hz, 2H), 7.44 (t,  $J = 7.2$  Hz, 2H), 7.36 (t,  $J = 7.8$  Hz, 1H), 7.26–7.23 (m, 2H), 7.13 (d,  $J = 7.8$  Hz, 1H), 7.08–7.05 (m, 2H), 7.01–6.98 (m, 2H), 5.83 (s, 1H), 2.39 (s, 3H), 1.21 (s, 9H).

$^{13}\text{C NMR}$  (151 MHz,  $\text{CDCl}_3$ )  $\delta$  161.0, 151.6, 149.2, 147.8, 146.3, 136.9, 131.9, 128.91, 128.9, 128.7, 128.1, 127.3, 125.9, 125.2, 123.2, 120.5, 119.6, 117.0, 116.4, 35.4, 34.3, 31.5, 14.1.

**HRMS** (ESI) calcd. for  $\text{C}_{27}\text{H}_{26}\text{NO}_2^+$  ( $[\text{M}+\text{H}]^+$ ): 396.1958, found: 396.1961.

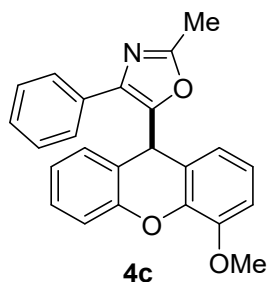

**5-(4-Methoxy-9H-xanthen-9-yl)-2-methyl-4-phenyloxazol (**4c**)**

Prepared following general procedure and the reaction mixture was purified by flash column chromatography with petroleum ether and ethylacetate (PE/EA = 20:1) to afford the product **4c** (79.7 mg, 72% yield).

White solid; m.p.: 151~152 °C.

<sup>1</sup>H NMR (600 MHz, CDCl<sub>3</sub>) δ 7.76 (d, *J* = 7.8 Hz, 2H), 7.44 (t, *J* = 7.8 Hz, 2H), 7.35 (t, *J* = 7.2 Hz, 1H), 7.27–7.23 (m, 2H), 7.03–6.98 (m, 2H), 6.94 (t, *J* = 7.8 Hz, 1H), 6.85 (d, *J* = 8.4 Hz, 1H), 6.64 (d, *J* = 7.8 Hz, 1H), 5.85 (s, 1H), 3.96 (s, 3H), 2.35 (s, 3H).

<sup>13</sup>C NMR (151 MHz, CDCl<sub>3</sub>) δ 161.1, 151.2, 148.3, 147.5, 141.2, 136.9, 131.9, 129.0, 128.7, 128.2, 127.2, 123.6, 123.0, 121.3, 120.3, 120.3, 117.3, 110.9, 56.4, 35.09, 14.2.

HRMS (ESI) calcd. for C<sub>24</sub>H<sub>20</sub>NO<sub>3</sub><sup>+</sup> ([M+H]<sup>+</sup>): 370.1438, found 370.1437.

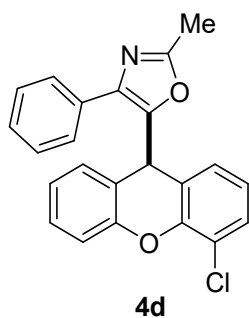

**5-(4-Chloro-9H-xanthen-9-yl)-2-methyl-4-phenyloxazole (**4d**)**

Prepared following general procedure and the reaction mixture was purified by flash column chromatography with petroleum ether and ethylacetate (PE/EA = 20:1) to afford the product **4d** (63.8 mg, 57% yield).

White solid; m.p.: 142~143 °C.

<sup>1</sup>H NMR (600 MHz, CDCl<sub>3</sub>) δ 7.77 (d, *J* = 7.8 Hz, 2H), 7.45 (t, *J* = 7.8 Hz, 2H), 7.37 (t, *J* = 7.2 Hz, 1H), 7.15 (d, *J* = 8.4 Hz, 2H), 7.04 (d, *J* = 7.2 Hz, 2H), 7.02–6.99 (m, 3H), 5.87 (s, 1H), 2.37 (s, 3H).

<sup>13</sup>C NMR (151 MHz, CDCl<sub>3</sub>) δ 161.2, 151.9, 150.9, 147.2, 137.1, 131.7, 130.0, 129.0, 128.9, 128.8, 128.3, 127.2, 123.8, 120.2, 117.0, 116.2, 110.7, 104.4, 104.3, 34.6, 14.1.

HRMS (ESI) calcd. for C<sub>23</sub>H<sub>17</sub>ClNO<sub>2</sub><sup>+</sup> ([M+H]<sup>+</sup>): 374.0942, found: 374.0945.

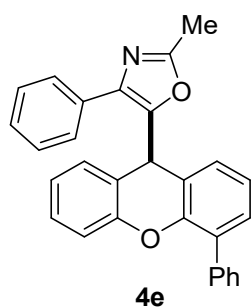

#### 2-Methyl-4-phenyl-5-(4-phenyl-9H-xanthen-9-yl)oxazole (**4e**)

Prepared following general procedure and the reaction mixture was purified by flash column chromatography with petroleum ether and ethylacetate (PE/EA = 20:1) to afford the product **4e** (77.2 mg, 62% yield).

White solid; m.p.: 173~174 °C.

<sup>1</sup>H NMR (600 MHz, CDCl<sub>3</sub>) δ 7.77 (d, *J* = 7.2 Hz, 2H), 7.64 (d, *J* = 7.2 Hz, 2H), 7.48 (t, *J* = 7.2 Hz, 2H), 7.46–7.43 (m, 2H), 7.40 (d, *J* = 7.2 Hz, 1H), 7.38–7.35 (m, 1H), 7.30 (d, *J* = 6.6 Hz, 1H), 7.21 (t, *J* = 7.2 Hz, 1H), 7.07–6.98 (m, 5H), 5.90 (s, 1H), 2.39 (s, 3H).

<sup>13</sup>C NMR (151 MHz, CDCl<sub>3</sub>) δ 161.2, 151.4, 148.3, 147.2, 137.7, 137.3, 131.8, 130.4, 130.2, 129.9, 129.0, 128.6, 128.5, 128.2, 128.0, 127.4, 127.3, 123.5, 123.3, 121.2, 120.7, 117.1, 35.5, 14.2.

HRMS (ESI) calcd. for C<sub>29</sub>H<sub>22</sub>NO<sub>2</sub><sup>+</sup> ([M+H]<sup>+</sup>): 416.1645, found: 416.1645.

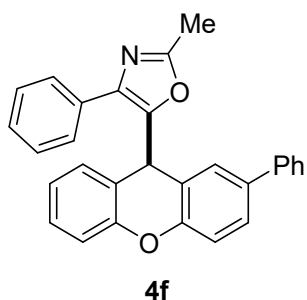

### 2-Methyl-4-phenyl-5-(2-phenyl-9H-xanthen-9-yl)oxazole (**4f**)

Prepared following general procedure and the reaction mixture was purified by flash column chromatography with petroleum ether and ethylacetate (PE/EA = 20:1) to afford the product **4f** (74.7 mg, 60% yield).

White solid; m.p.: 170~171 °C.

<sup>1</sup>H NMR (600 MHz, CDCl<sub>3</sub>) δ 7.79 (d, *J* = 7.8 Hz, 2H), 7.49 (dd, *J* = 8.4, 1.2 Hz, 1H), 7.45 (t, *J* = 7.8 Hz, 4H), 7.39 (t, *J* = 7.8 Hz, 3H), 7.32–7.27 (m, 2H), 7.25–7.21 (m, 2H), 7.17 (d, *J* = 8.4 Hz, 1H), 7.06 (d, *J* = 7.8 Hz, 1H), 7.02 (t, *J* = 7.2 Hz, 1H), 5.93 (s, 1H), 2.38 (s, 3H).

<sup>13</sup>C NMR (151 MHz, CDCl<sub>3</sub>) δ 161.1, 151.2, 150.8, 147.3, 140.3, 137.2, 136.5, 131.8, 128.9, 128.9, 128.8, 128.8, 128.2, 127.5, 127.2, 126.9, 123.5, 120.6, 120.3, 117.4, 117.0, 35.1, 14.1.

HRMS (ESI) calcd. for C<sub>29</sub>H<sub>22</sub>NO<sub>2</sub><sup>+</sup> ([M+H]<sup>+</sup>): 416.1645, found: 416.1646.

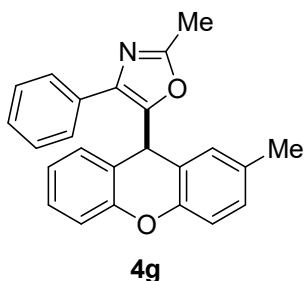

### 2-Methyl-5-(2-methyl-9H-xanthen-9-yl)-4-phenyloxazole (**4g**)



Prepared following general procedure and the reaction mixture was purified by flash column chromatography with petroleum ether and ethylacetate (PE/EA = 20:1) to afford the product **4g** (73.1 mg, 69% yield).

White solid; m.p.: 156~157 °C.

<sup>1</sup>H NMR (600 MHz, CDCl<sub>3</sub>) δ 7.79 (d, *J* = 7.8 Hz, 2H), 7.47–7.44 (m, 2H), 7.38 (d, *J* = 7.2 Hz, 1H), 7.24 (d, *J* = 7.2 Hz, 1H), 7.13 (d, *J* = 8.4 Hz, 1H), 7.06–7.03 (m, 2H), 7.02–6.98 (m, 2H), 6.83 (s, 1H), 5.84 (s, 1H), 2.38 (s, 3H), 2.25 (s, 3H).

<sup>13</sup>C NMR (151 MHz, CDCl<sub>3</sub>) δ 161.1, 151.4, 149.2, 147.6, 136.9, 132.8, 131.9, 129.5, 129.0, 129.0, 128.8, 128.7, 128.2, 127.2, 123.2, 120.4, 119.9, 117.0, 116.7, 35.0, 20.9, 14.2.

HRMS (ESI) calcd. for C<sub>24</sub>H<sub>20</sub>NO<sub>2</sub><sup>+</sup> ([M+H]<sup>+</sup>): 354.1489, found: 354.1485.

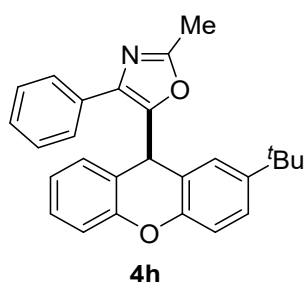

#### 5-(2-(*tert*-Butyl)-9H-xanthen-9-yl)-2-methyl-4-phenyloxazole (**4h**)

Prepared following general procedure and the reaction mixture was purified by flash column chromatography with petroleum ether and ethylacetate (PE/EA = 20:1) to afford the product **4h** (75.8 mg, 64% yield).

White solid; m.p.: 167~168 °C.

<sup>1</sup>H NMR (600 MHz, CDCl<sub>3</sub>) δ 7.74 (d, *J* = 7.2 Hz, 2H), 7.44 (t, *J* = 7.8 Hz, 2H), 7.36 (t, *J* = 7.2 Hz, 1H), 7.28–7.24 (m, 2H), 7.13 (d, *J* = 8.4 Hz, 1H), 7.08–7.04 (m, 2H), 7.01–6.98 (m, 2H), 5.83 (s, 1H), 2.38 (s, 3H), 1.20 (s, 9H).

$^{13}\text{C}$  NMR (151 MHz,  $\text{CDCl}_3$ )  $\delta$  160.9, 151.5, 149.2, 147.7, 146.3, 136.9, 131.9, 128.9, 128.8, 128.6, 128.1, 127.3, 125.8, 125.2, 123.2, 120.5, 119.5, 116.9, 116.4, 35.3, 34.3, 31.4, 14.1.

HRMS (ESI) calcd. for  $\text{C}_{27}\text{H}_{26}\text{NO}_2^+$  ( $[\text{M}+\text{H}]^+$ ): 396.1958, found: 396.1958.

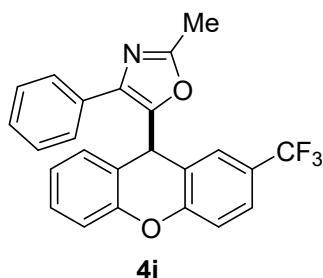

### 2-Methyl-4-phenyl-5-(2-(trifluoromethyl)-9H-xanthen-9-yl)oxazole (**4i**)

Prepared following general procedure and the reaction mixture was purified by flash column chromatography with petroleum ether and ethylacetate (PE/EA = 20:1) to afford the product **4i** (64.7 mg, 53% yield).

White solid; m.p.: 133~134 °C.

$^1\text{H}$  NMR (600 MHz,  $\text{CDCl}_3$ )  $\delta$  7.73 (d,  $J = 7.2$  Hz, 2H), 7.51 (d,  $J = 7.2$  Hz, 1H), 7.45 (t,  $J = 7.8$  Hz, 2H), 7.39 (d,  $J = 7.8$  Hz, 1H), 7.30–7.27 (m, 2H), 7.22 (d,  $J = 8.4$  Hz, 1H), 7.16 (d,  $J = 8.6$  Hz, 1H), 7.05 (d,  $J = 6.6$  Hz, 2H), 5.86 (s, 1H), 2.39 (s, 3H).

$^{13}\text{C}$  NMR (151 MHz,  $\text{CDCl}_3$ )  $\delta$  160.4, 152.8, 149.7, 145.6, 136.5, 130.5, 128.1, 128.0, 127.8, 127.4, 126.3, 126.2, 125.8 (q,  $J = 271.6$  Hz), 125.3 (q,  $J = 3.2$  Hz), 125.0 (q,  $J = 3.8$  Hz), 123.2, 120.0, 118.9, 116.6, 116.1, 34.0, 13.2.

$^{19}\text{F}$  NMR (565 MHz,  $\text{CDCl}_3$ )  $\delta$  -61.8.

HRMS (ESI) calcd. for  $\text{C}_{20}\text{H}_{17}\text{O}_2^+$  ( $[\text{M}+\text{H}]^+$ ): 408.1206, found: 408.1206.

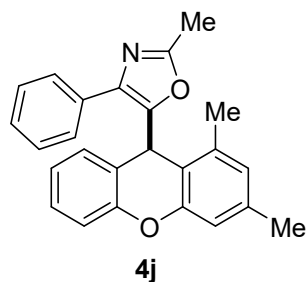

### 5-(1,3-Dimethyl-9H-xanthen-9-yl)-2-methyl-4-phenyloxazo (**4j**)

Prepared following general procedure and the reaction mixture was purified by flash column chromatography with petroleum ether and ethylacetate (PE/EA = 20:1) to afford the product **4j** (69.8 mg, 70% yield).

White solid; m.p.: 186~187 °C.

<sup>1</sup>H NMR (600 MHz, CDCl<sub>3</sub>) δ 7.66 (d, *J* = 7.8 Hz, 2H), 7.26–7.24 (m, 3H), 7.18 (d, *J* = 8.4 Hz, 1H), 7.11 (d, *J* = 6.6 Hz, 1H), 7.02–6.97 (m, 2H), 6.91–6.85 (m, 2H), 5.84 (s, 1H), 2.42 (s, 3H), 2.39 (s, 3H), 2.36 (s, 3H).

<sup>13</sup>C NMR (151 MHz, CDCl<sub>3</sub>) δ 161.0, 151.5, 149.6, 147.2, 138.0, 137.1, 130.0, 129.7, 129.0, 128.7, 128.6, 127.1, 126.3, 126.2, 123.3, 122.8, 120.7, 120.1, 117.1, 35.2, 21.4, 16.2, 14.2.

HRMS (ESI) calcd. for C<sub>25</sub>H<sub>22</sub>NO<sub>2</sub><sup>+</sup> ([M+H]<sup>+</sup>): 368.1645, found 368.1644.

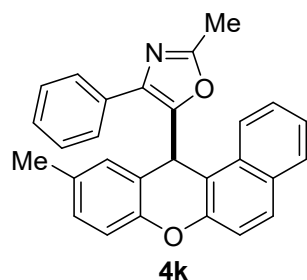

### 2-Methyl-5-(10-methyl-12H-benzo[a]xanthen-12-yl)-4-phenyloxazole (**4k**)

Prepared following general procedure and the reaction mixture was purified by flash column chromatography with petroleum ether and ethylacetate (PE/EA = 20:1) to afford the product **4k** (76.1 mg, 63% yield).

White solid; m.p.: 195~196 °C.

**<sup>1</sup>H NMR** (600 MHz, CDCl<sub>3</sub>) δ 7.79–7.75 (m, 4H), 7.51 (d, *J* = 8.4 Hz, 1H), 7.47 (d, *J* = 7.2 Hz, 1H), 7.3–7.33 (m, 3H), 7.32–7.29 (m, 2H), 7.25–7.20 (m, 2H), 7.12–7.09 (m, 1H), 6.30 (s, 1H), 2.47 (s, 3H), 2.21 (s, 3H).

**<sup>13</sup>C NMR** (151 MHz, CDCl<sub>3</sub>) δ 160.3, 151.2, 149.5, 148.5, 138.0, 134.0, 131.7, 130.6, 129.8, 129.6, 129.5, 129.1, 128.7, 127.3, 127.0, 124.3, 123.8, 122.6, 121.1, 118.2, 117.1, 112.3, 33.0, 21.5, 14.1.

**HRMS** (ESI) calcd. for C<sub>28</sub>H<sub>22</sub>NO<sub>2</sub><sup>+</sup> ([M+H]<sup>+</sup>): 404.1645, found 404.1648.

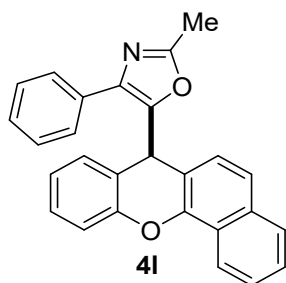

#### **5-(7H-benzo[c]xanthen-7-yl)-2-methyl-4-phenyloxazole (4I)**

Prepared following general procedure and the reaction mixture was purified by flash column chromatography with petroleum ether and ethylacetate (PE/EA = 20:1) to afford the product **4I** (76.8 mg, 66% yield).

White solid; m.p.: 185~186 °C.

**<sup>1</sup>H NMR** (600 MHz, CDCl<sub>3</sub>) δ 7.97–7.94 (m, 1H), 7.84 (d, *J* = 7.8 Hz, 2H), 7.52–7.50 (m, 1H), 7.47–7.45 (m, 2H), 7.43 (d, *J* = 7.2 Hz, 1H), 7.14 (t, *J* = 7.2 Hz, 2H), 7.01 (d, *J* = 8.4 Hz, 2H), 6.97 (d, *J* = 7.8 Hz, 2H), 7.92–7.88 (m, 2H), 5.39 (s, 1H), 2.37 (s, 3H).

**<sup>13</sup>C NMR** (151 MHz, CDCl<sub>3</sub>) δ 161.1, 151.2, 150.8, 147.3, 140.3, 137.2, 136.5, 131.8, 129.9, 128.9, 128.9, 128.8, 128.76, 128.2, 127.5, 127.2, 126.9, 123.5, 120.6, 120.3, 117.4, 117.0, 35.1, 14.1.

**HRMS** (ESI) calcd. for C<sub>28</sub>H<sub>22</sub>NO<sub>2</sub><sup>+</sup> ([M+H]<sup>+</sup>): 390.1489, found 390.1488.

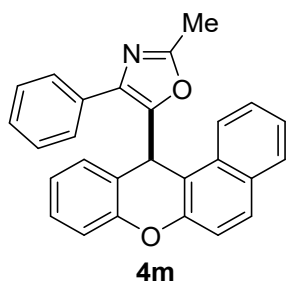

**5-(12*H*-benzo[*a*]xanthen-12-yl)-2-methyl-4-phenyloxazole (4m)**

Prepared following general procedure and the reaction mixture was purified by flash column chromatography with petroleum ether and ethylacetate (PE/EA = 20:1) to afford the product **4m** (66.4 mg, 57% yield).

White solid; m.p.: 175~176 °C.

<sup>1</sup>H NMR (600 MHz, CDCl<sub>3</sub>) δ 7.79 (d, *J* = 7.2 Hz, 2H), 7.67–7.64 (m, 2H), 7.50 (t, *J* = 7.6 Hz, 2H), 7.46 (t, *J* = 7.2 Hz, 2H), 7.42 (d, *J* = 7.8 Hz, 1H), 7.41–7.38 (m, 1H), 7.33–7.31 (m, 1H), 7.25–7.21 (m, 1H), 7.10–7.07 (m, 2H), 7.01 (d, *J* = 7.2 Hz, 1H), 5.92 (s, 1H), 2.41 (s, 3H).

<sup>13</sup>C NMR (151 MHz, CDCl<sub>3</sub>) δ 161.3, 151.5, 148.4, 147.3, 137.8, 137.3, 131.9, 130.4, 130.3, 129.9, 129.8, 129.0, 128.7, 128.6, 128.3, 128.0, 127.5, 127.3, 123.6, 123.4, 121.3, 120.8, 117.2, 35.5, 14.2.

HRMS (ESI) calcd. for C<sub>28</sub>H<sub>22</sub>NO<sub>2</sub><sup>+</sup> ([M+H]<sup>+</sup>): 390.1489, found 390.1485.

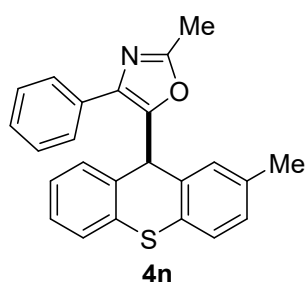

**2-Methyl-5-(2-methyl-9*H*-thioxanthen-9-yl)-4-phenyloxazole (4n)**

Prepared following general procedure and the reaction mixture was purified by flash column chromatography with petroleum ether and ethylacetate (PE/EA = 20:1) to afford the product **4n** (66.5 mg, 60% yield).

White solid; m.p.: 160~161 °C.

<sup>1</sup>H NMR (600 MHz, CDCl<sub>3</sub>) δ 7.79 (d, *J* = 7.8 Hz, 2H), 7.46 (t, *J* = 7.8 Hz, 2H), 7.37 (t, *J* = 7.8 Hz, 1H), 7.23 (d, *J* = 7.8 Hz, 1H), 7.12 (d, *J* = 7.8 Hz, 1H), 7.05–7.03 (m, 2H), 7.00–6.95 (m, 2H), 6.82 (s, 1H), 5.83 (s, 1H), 2.38 (s, 3H), 2.24 (s, 3H).

<sup>13</sup>C NMR (151 MHz, CDCl<sub>3</sub>) δ 161.0, 151.4, 149.2, 147.6, 136.9, 132.8, 131.86, 129.4, 128.9, 128.9, 128.8, 128.6, 128.1, 127.1, 123.1, 120.4, 119.9, 116.9, 116.7, 35.0, 20.8, 14.1.

HRMS (ESI) calcd. for C<sub>24</sub>H<sub>20</sub>NOS<sup>+</sup> ([M+H]<sup>+</sup>): 370.1260, found: 370.1254.

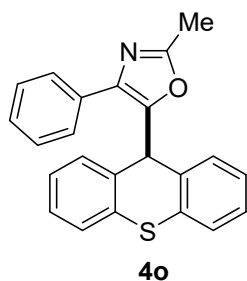

### 2-Methyl-4-phenyl-5-(9H-thioxanthen-9-yl)oxazole (**4o**)

Prepared following general procedure and the reaction mixture was purified by flash column chromatography with petroleum ether and ethylacetate (PE/EA = 20:1) to afford the product **4o** (61.8 mg, 58% yield).

White solid; m.p.: 166~167 °C.

<sup>1</sup>H NMR (600 MHz, CDCl<sub>3</sub>) δ 7.78–7.75 (m, 2H), 7.45 (t, *J* = 7.6 Hz, 2H), 7.37–7.35 (m, 1H), 7.27–6.24 (m, 2H), 7.14 (d, *J* = 8.4, 2H), 7.04 (d, *J* = 6.6 Hz, 2H), 7.02–6.99 (m, 2H), 5.87 (s, 1H), 2.37 (s, 3H).

<sup>13</sup>C NMR (151 MHz, CDCl<sub>3</sub>) δ 161.1, 151.4, 147.4, 137.1, 131.9, 129.0, 128.8, 128.8, 128.3, 127.2, 123.4, 120.5, 117.0, 35.0, 14.2.

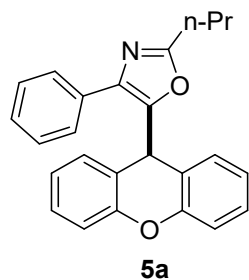

#### 4-Phenyl-2-propyl-5-(9*H*-xanthen-9-yl)oxazole (**5a**)

Prepared following general procedure and the reaction mixture was purified by flash column chromatography with petroleum ether and ethylacetate (PE/EA = 30:1) to afford the product **5a** (67.2 mg, 61% yield).

White solid; m.p.: 211~212 °C.

<sup>1</sup>H NMR (600 MHz, CDCl<sub>3</sub>) δ 7.77–7.75 (m, 2H), 7.43 (t, *J* = 7.8 Hz, 2H), 7.37–7.34 (m, 1H), 7.26–7.24 (m, 2H), 7.14 (d, *J* = 7.8 Hz, 2H), 7.01–7.68 (m, 4H), 5.85 (s, 1H), 2.66 (t, *J* = 7.8 Hz, 2H), 1.74–1.67 (m, 2H), 0.89 (t, *J* = 7.2 Hz, 3H).

<sup>13</sup>C NMR (151 MHz, CDCl<sub>3</sub>) δ 164.6, 151.4, 146.8, 137.4, 132.0, 128.9, 128.7, 128.6, 128.2, 127.3, 123.4, 120.7, 117.0, 35.1, 30.1, 20.7, 13.7.

HRMS (ESI) calcd. for C<sub>25</sub>H<sub>21</sub>NO<sub>2</sub><sup>+</sup> ([M+H]<sup>+</sup>): 368.1645, found: 368.1642.

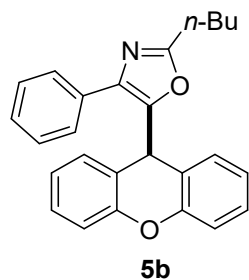

#### 2-Butyl-4-phenyl-5-(9*H*-xanthen-9-yl)oxazole (**5b**)

Prepared following general procedure and the reaction mixture was purified by flash column chromatography with petroleum ether and ethylacetate (PE/EA = 30:1) to afford the product **5b** (49.3 mg, 43% yield).

White solid; m.p.: 211~212 °C.

$^1\text{H NMR}$  (600 MHz,  $\text{CDCl}_3$ )  $\delta$  7.75 (d,  $J = 7.8$  Hz, 2H), 7.43 (t,  $J = 7.8$  Hz, 2H), 7.35 (d,  $J = 7.2$  Hz, 1H), 7.26–7.24 (m, 2H), 7.14 (d,  $J = 8.4$  Hz, 2H), 7.02–7.98 (m, 4H), 5.85 (s, 1H), 2.67 (t,  $J = 7.8$  Hz, 2H), 1.68–1.63 (m, 2H), 1.32–1.26 (m, 2H), 0.85 (t,  $J = 7.2$  Hz, 3H).

$^{13}\text{C NMR}$  (151 MHz,  $\text{CDCl}_3$ )  $\delta$  164.8, 151.4, 146.8, 137.3, 132.0, 128.9, 128.6, 128.1, 127.3, 126.9, 123.4, 120.6, 116.9, 35.1, 29.2, 28.0, 22.3, 13.7.

**HRMS** (ESI) calcd. for  $\text{C}_{26}\text{H}_{23}\text{NO}_2^+$  ( $[\text{M}+\text{H}]^+$ ): 382.1802, found: 382.1798.

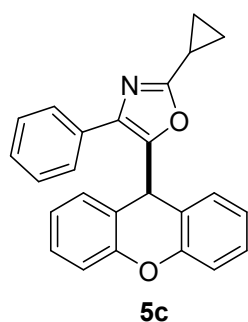

### 2-Cyclopropyl-4-phenyl-5-(9*H*-xanthen-9-yl)oxazole (**5c**)

Prepared following general procedure and the reaction mixture was purified by flash column chromatography with petroleum ether and ethylacetate (PE/EA = 30:1) to afford the product **5c** (60.1 mg, 55% yield).

White solid; m.p.: 198~199 °C.

$^1\text{H NMR}$  (600 MHz,  $\text{CDCl}_3$ )  $\delta$  7.73 (d,  $J = 7.2$  Hz, 2H), 7.42 (t,  $J = 7.8$  Hz, 2H), 7.34 (t,  $J = 7.8$  Hz, 1H), 7.26–.23 (m, 2H), 7.14 (d,  $J = 7.8$  Hz, 2H), 7.03–6.99 (m, 4H), 5.81 (s, 1H), 1.98–1.93 (m, 1H), 1.00–0.97 (m, 2H), 0.96–0.92 (m, 2H).

$^{13}\text{C NMR}$  (151 MHz,  $\text{CDCl}_3$ )  $\delta$  165.6, 151.3, 146.0, 137.3, 131.8, 128.8, 128.6, 128.5, 128.0, 127.2, 123.3, 120.6, 116.8, 35.0, 8.9, 8.5.

**HRMS** (ESI) calcd. for  $\text{C}_{25}\text{H}_{19}\text{NO}_2^+$  ( $[\text{M}+\text{H}]^+$ ): 366.1489, found: 366.1485.

## 5. References:



1. Chen, X.; Liu, H.; Gao, H.; Li, P.; Miao, T.; Li, H. *J. Org. Chem.* **2022**, *87*, 1056–1064.
2. Gao, H.; Chen, X.; Wang, P.-L.; Shi, M.-M.; Shang, L.-L.; Guo, H.-Y.; Li, H.; Li, P. *Org. Chem. Front.*, **2022**, *9*, 1911–1916.

## 6. NMR Spectra of the Products

NMR spectra of 2-methyl-4-phenyl-5-(9*H*-xanthen-9-yl)oxazole (**3a**)

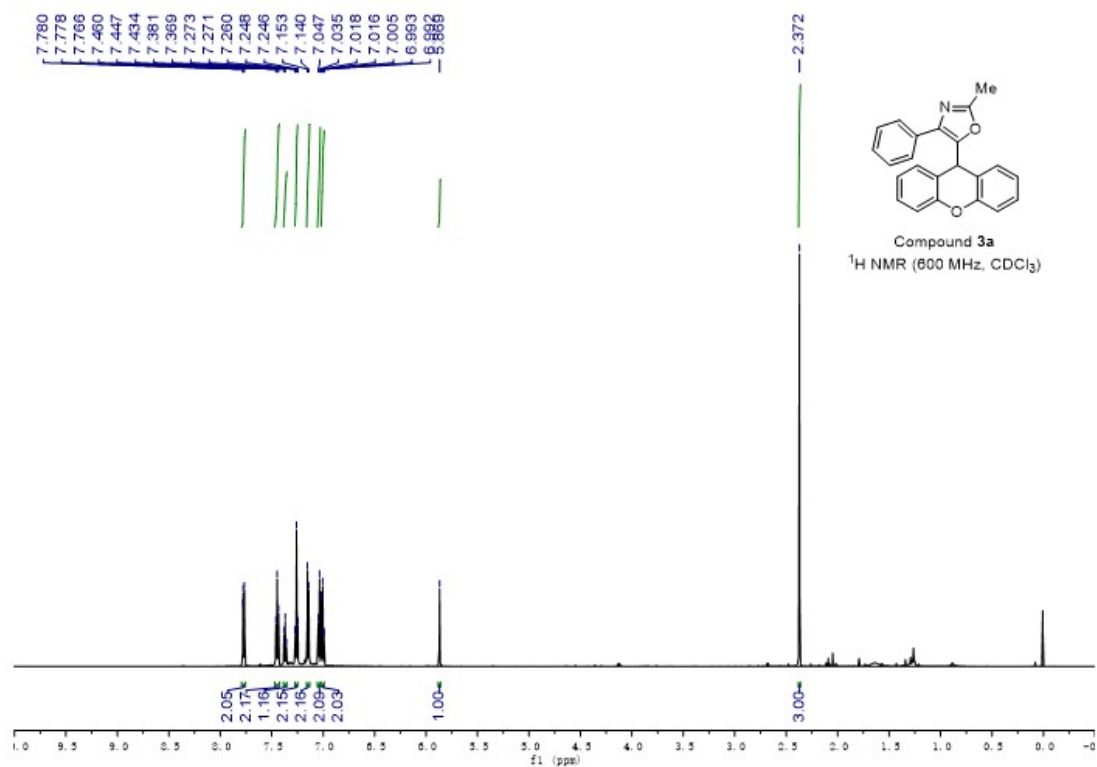

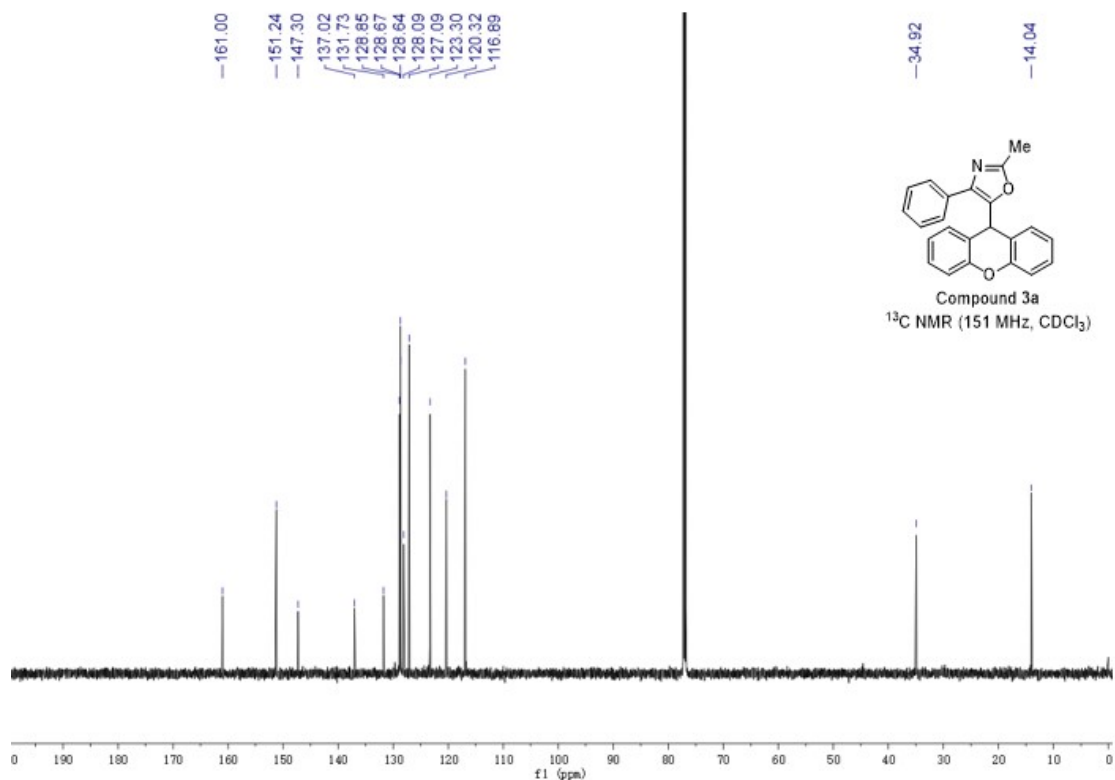

NMR spectra of 2-methyl-4-(*p*-tolyl)-5-(9*H*-xanthen-9-yl)oxazole (**3b**)

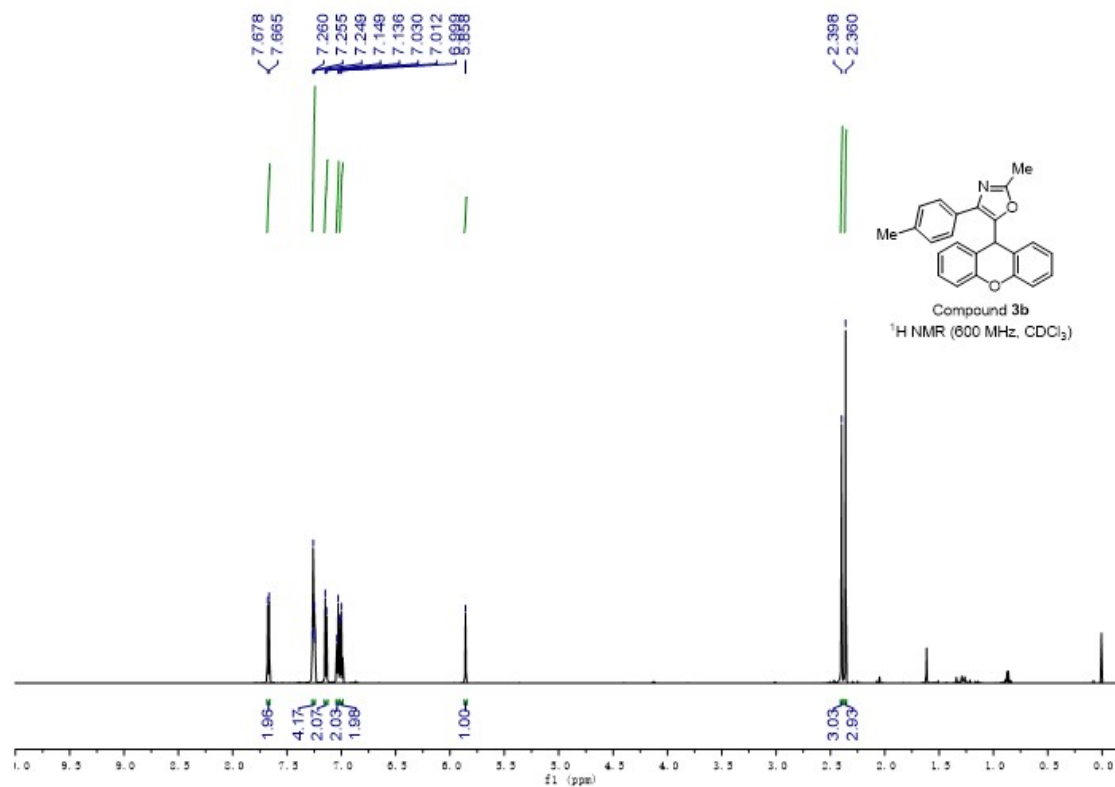

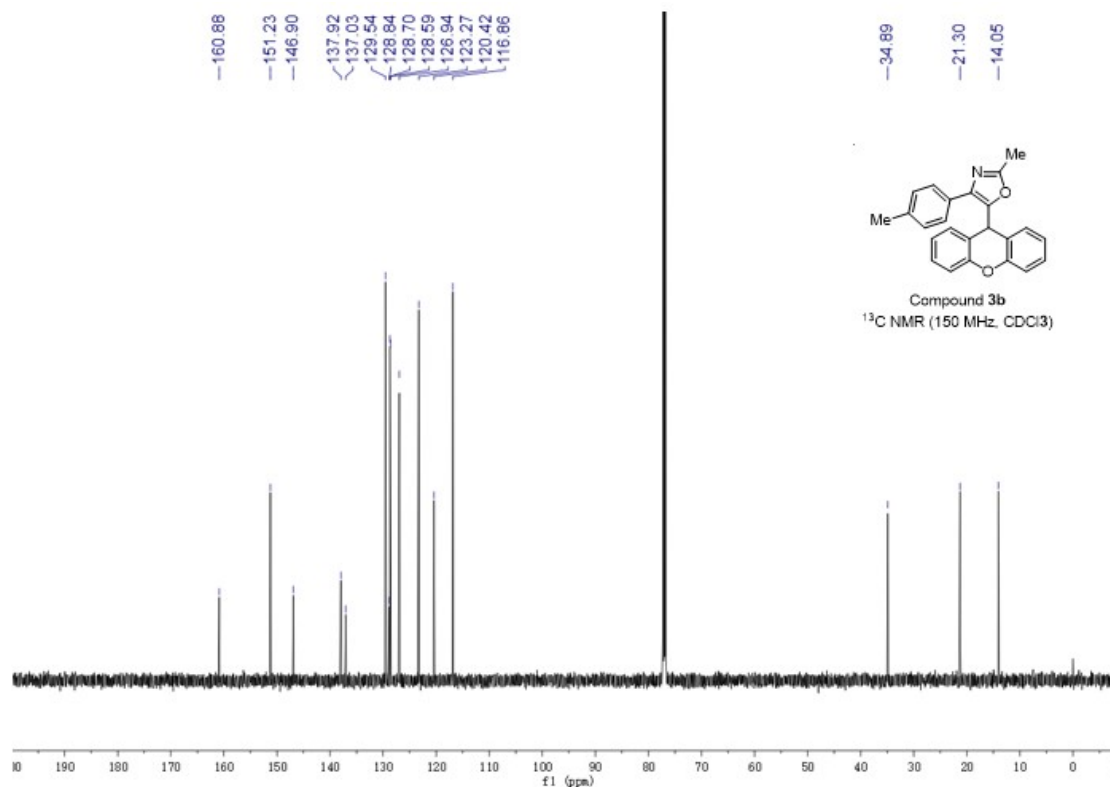

NMR spectra of 4-(4-ethylphenyl)-2-methyl-5-(9H-xanthen-9-yl)oxazole (**3c**)

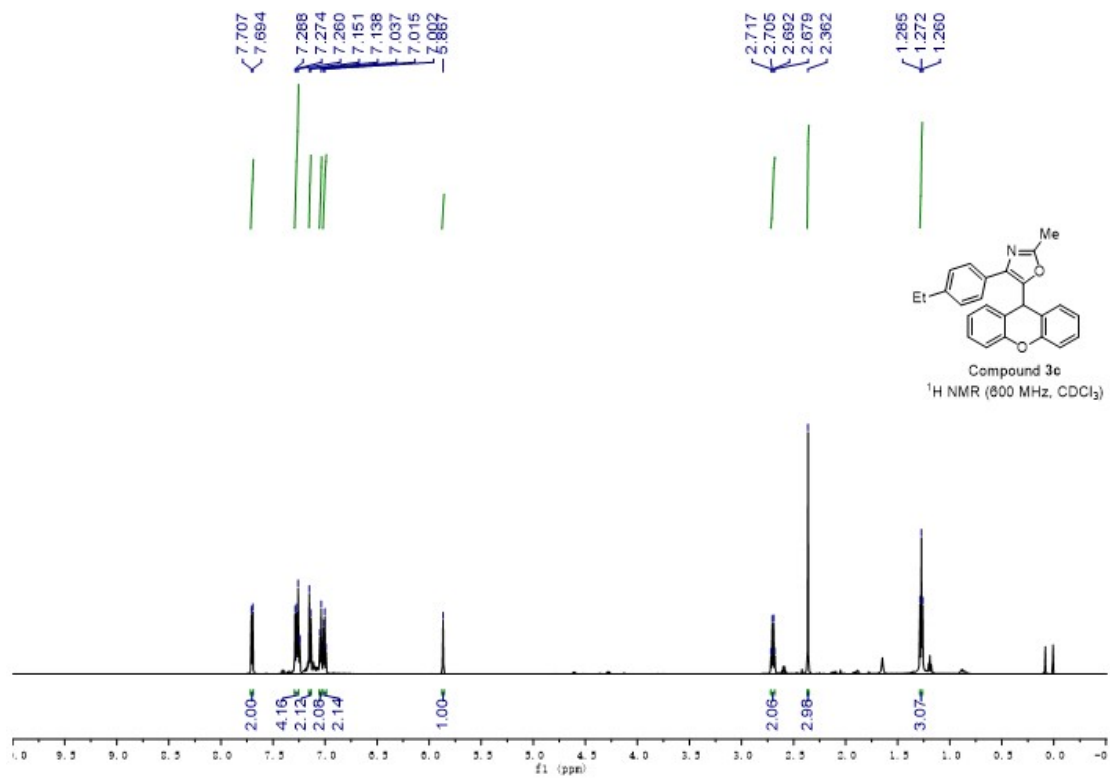

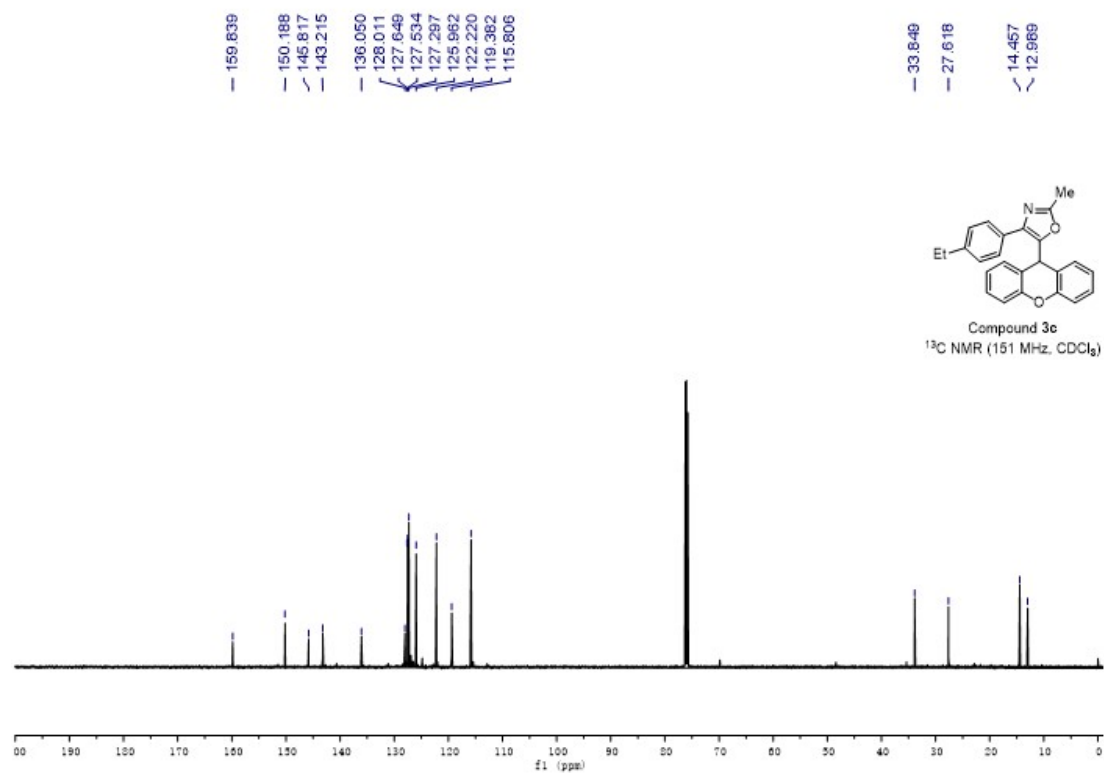

NMR spectra of 4-(4-butylphenyl)-2-methyl-5-(9*H*-xanthen-9-yl)oxazole (**3d**)

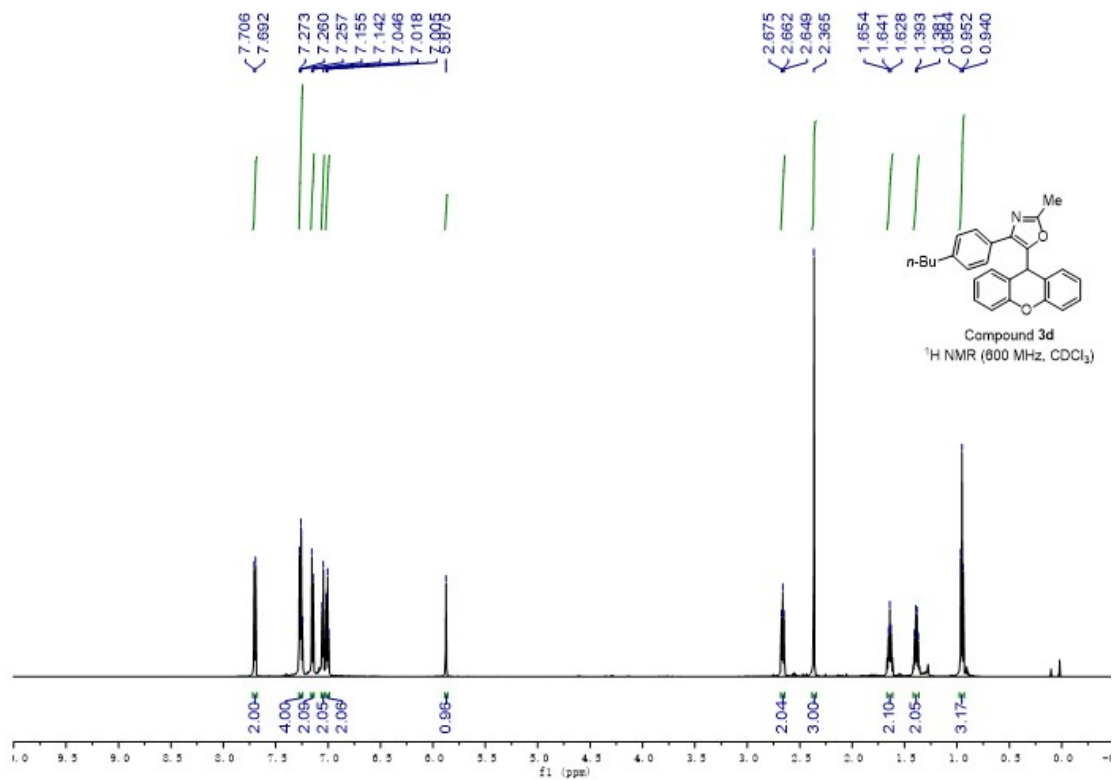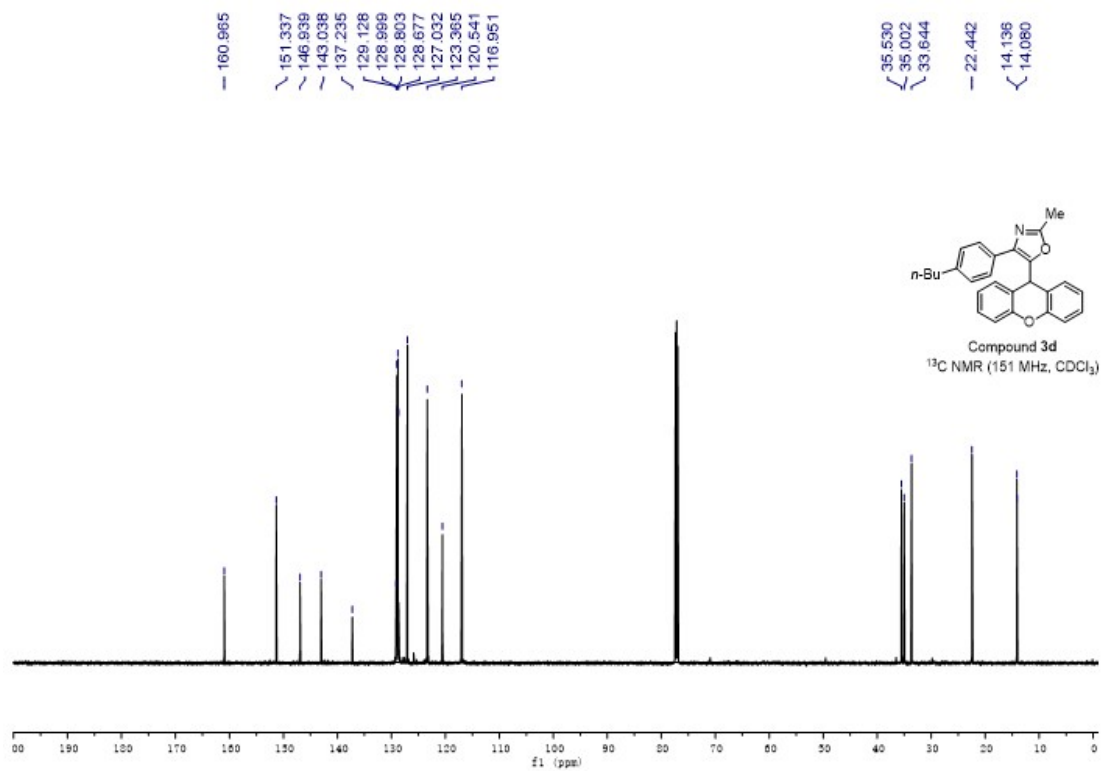

NMR spectra of 4-(4-*tert*-Butylphenyl)-2-methyl-5-(9H-xanthen-9-yl)oxazole (**3e**)

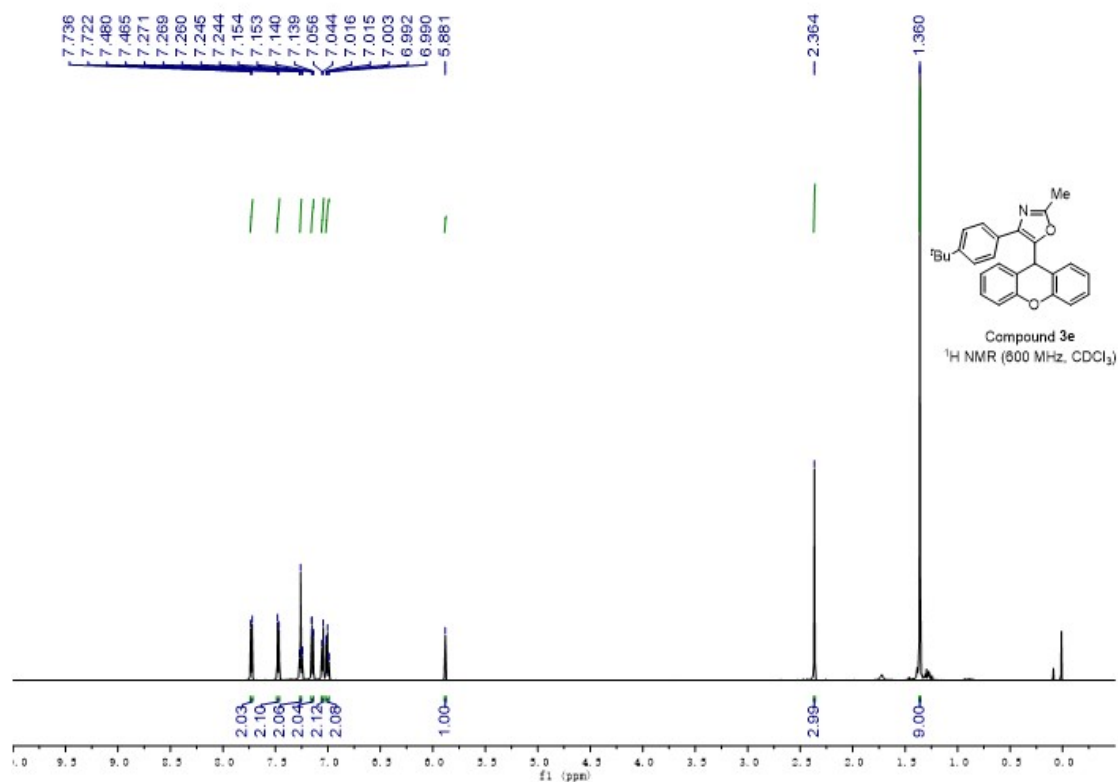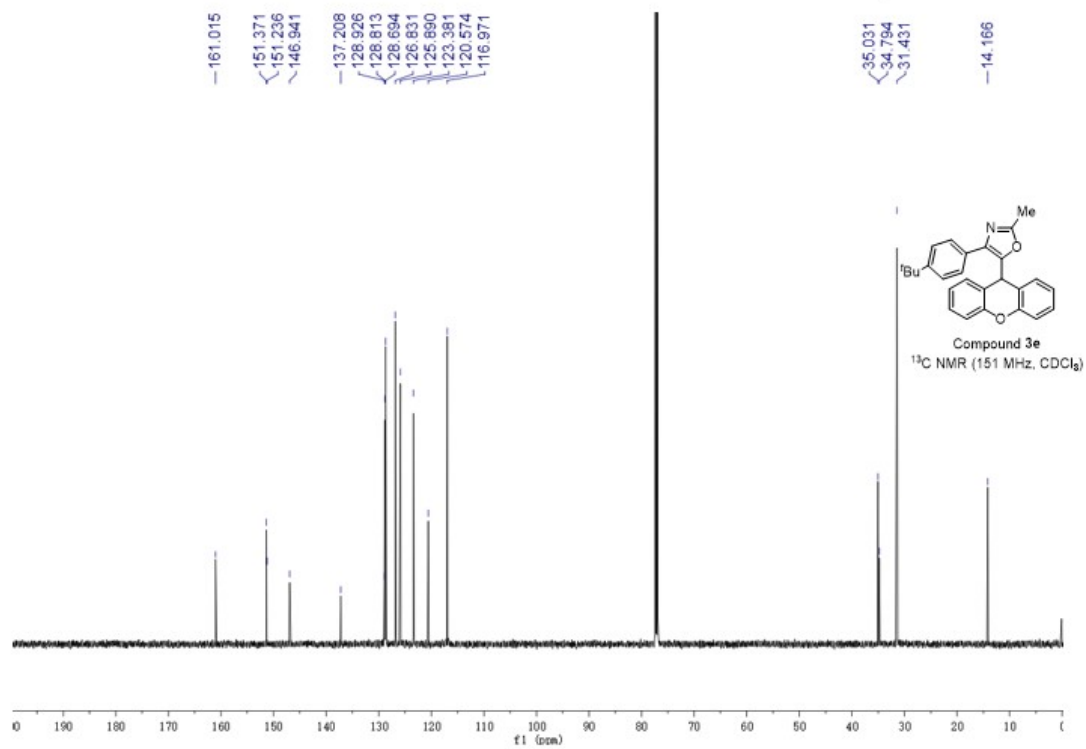

NMR spectra of 2-Methyl-4-(4-pentylphenyl)-5-(9H-xanthen-9-yl)oxazole (**3f**)

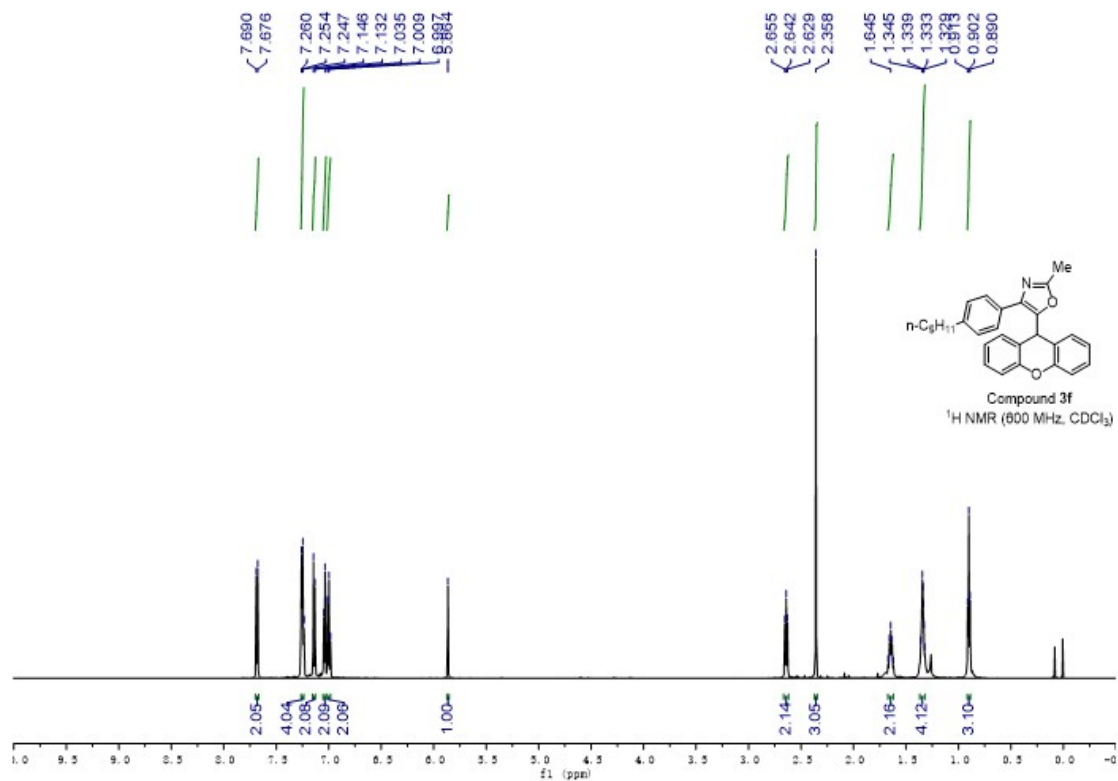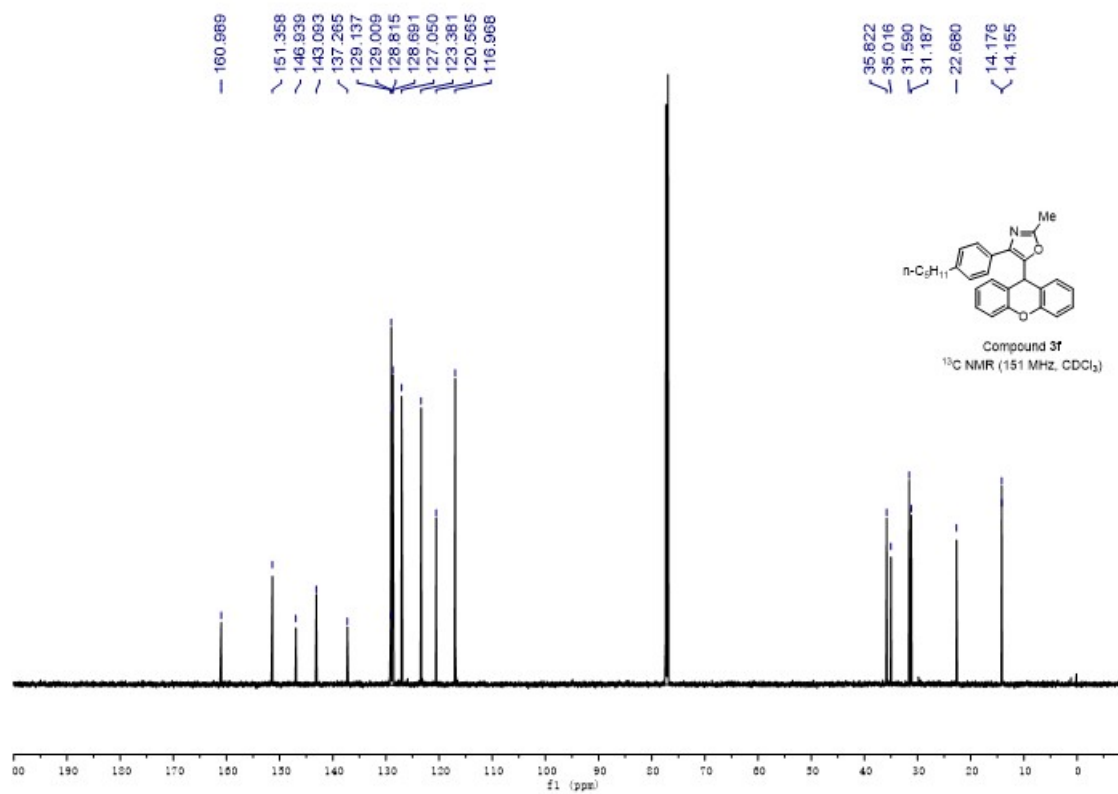

NMR spectra of 4-(4-methoxyphenyl)-2-methyl-5-(9*H*-xanthen-9-yl)oxazole (**3g**)

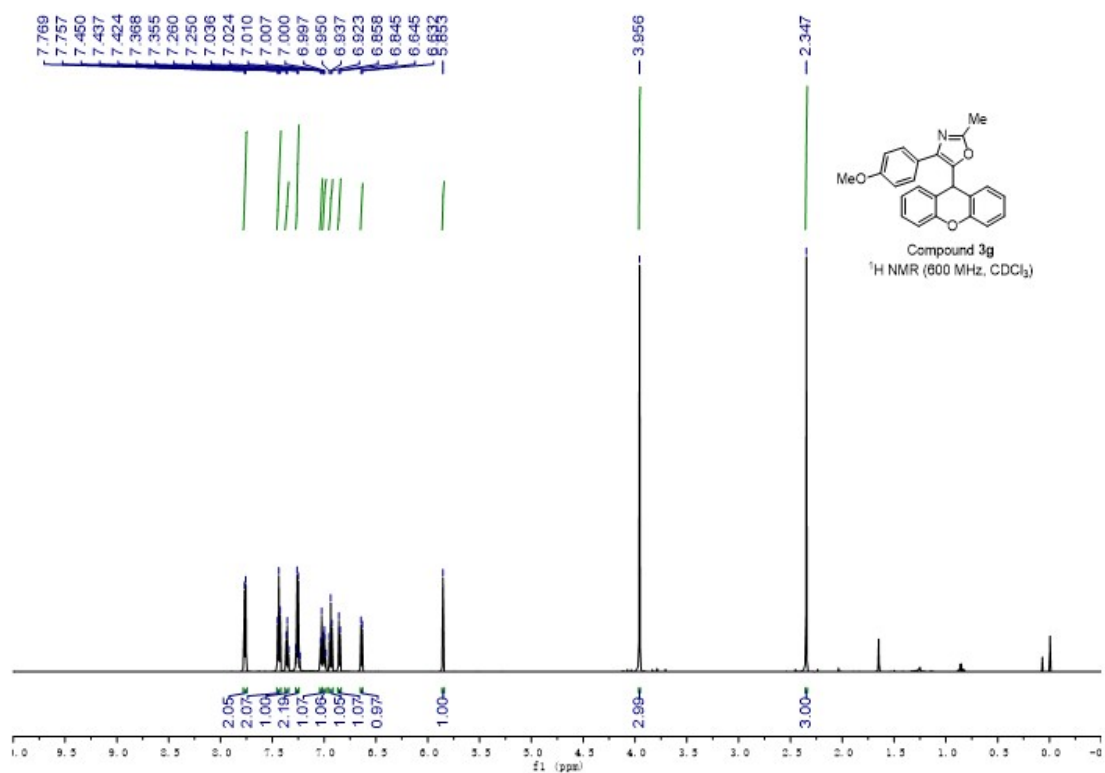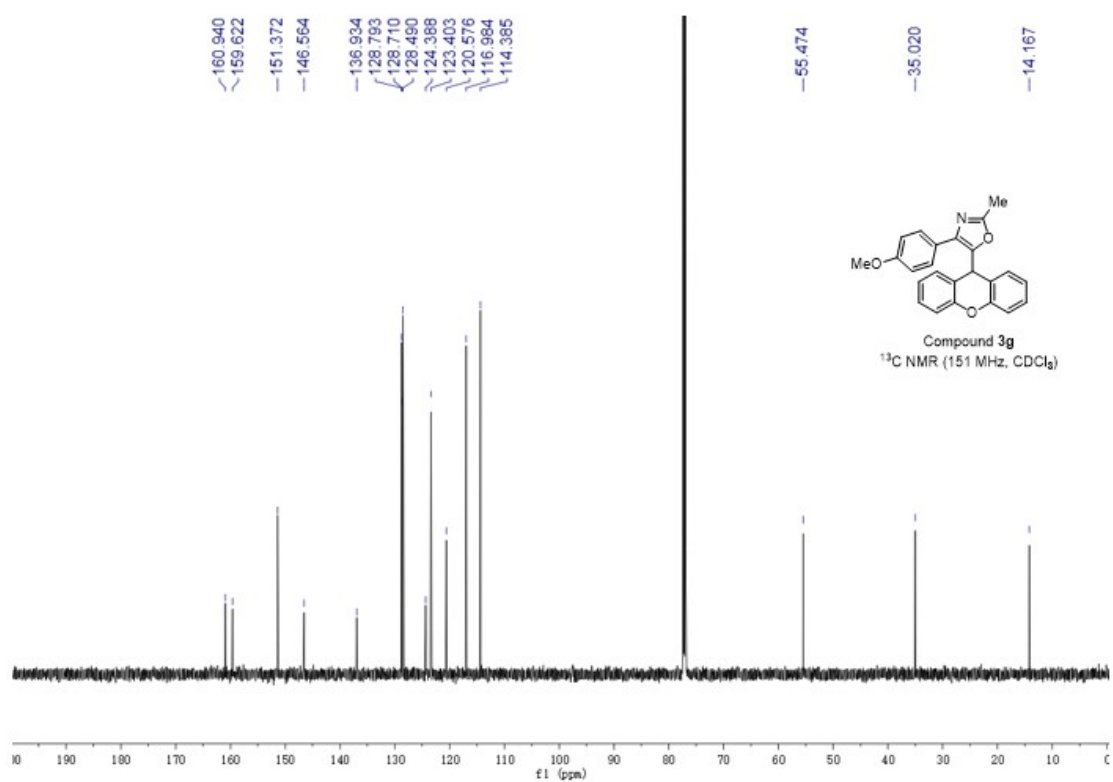



NMR spectra of 4-(4-chlorophenyl)-2-methyl-5-(9*H*-xanthen-9-yl)oxazole (**3h**)

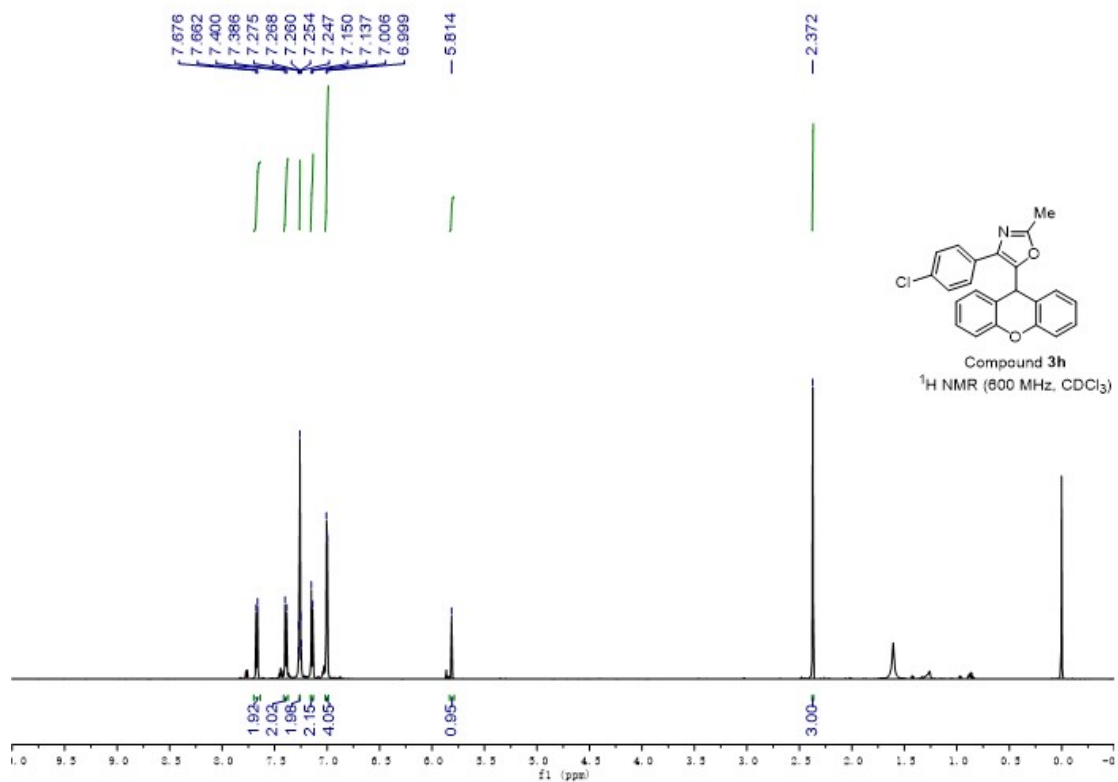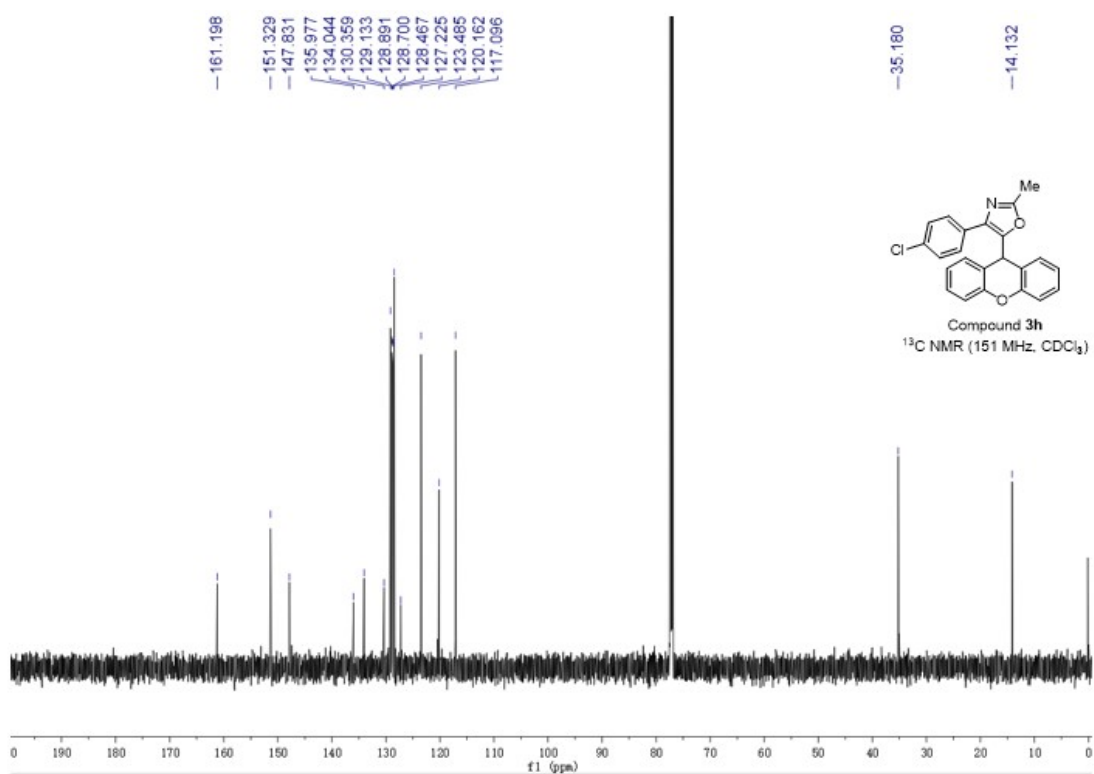

NMR spectra of 4-(4-Bromophenyl)-2-methyl-5-(9*H*-xanthen-9-yl)oxazole (**3i**)

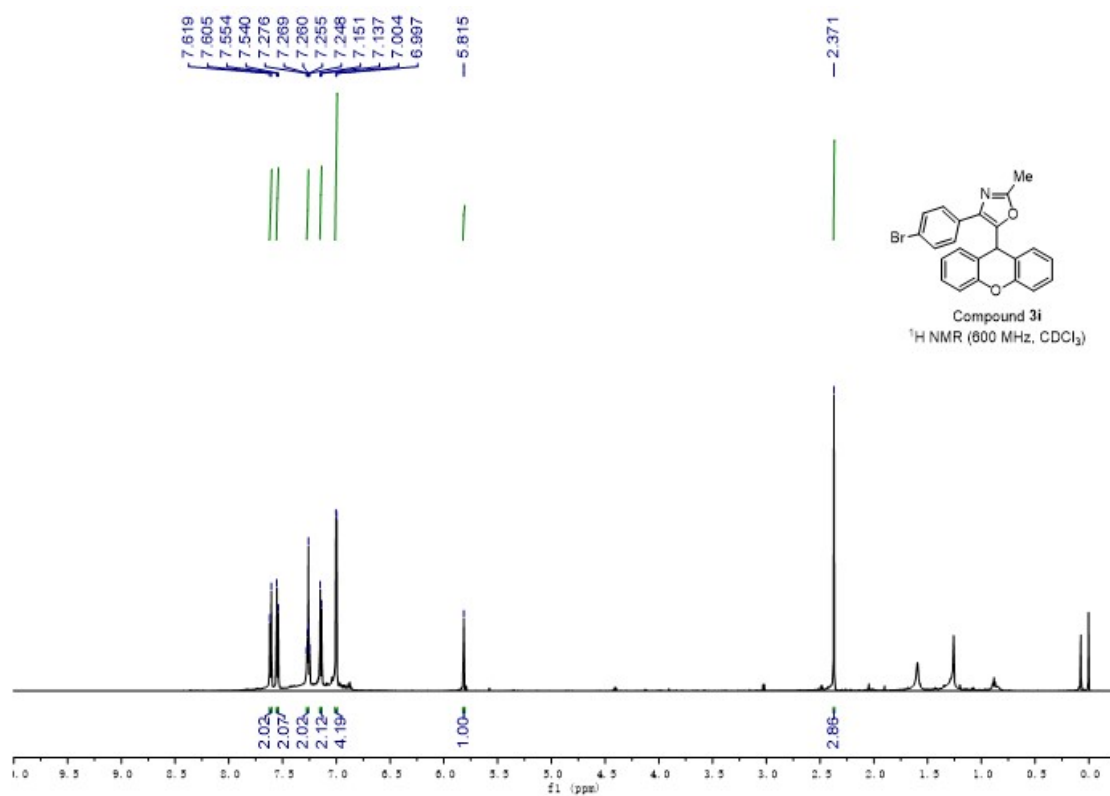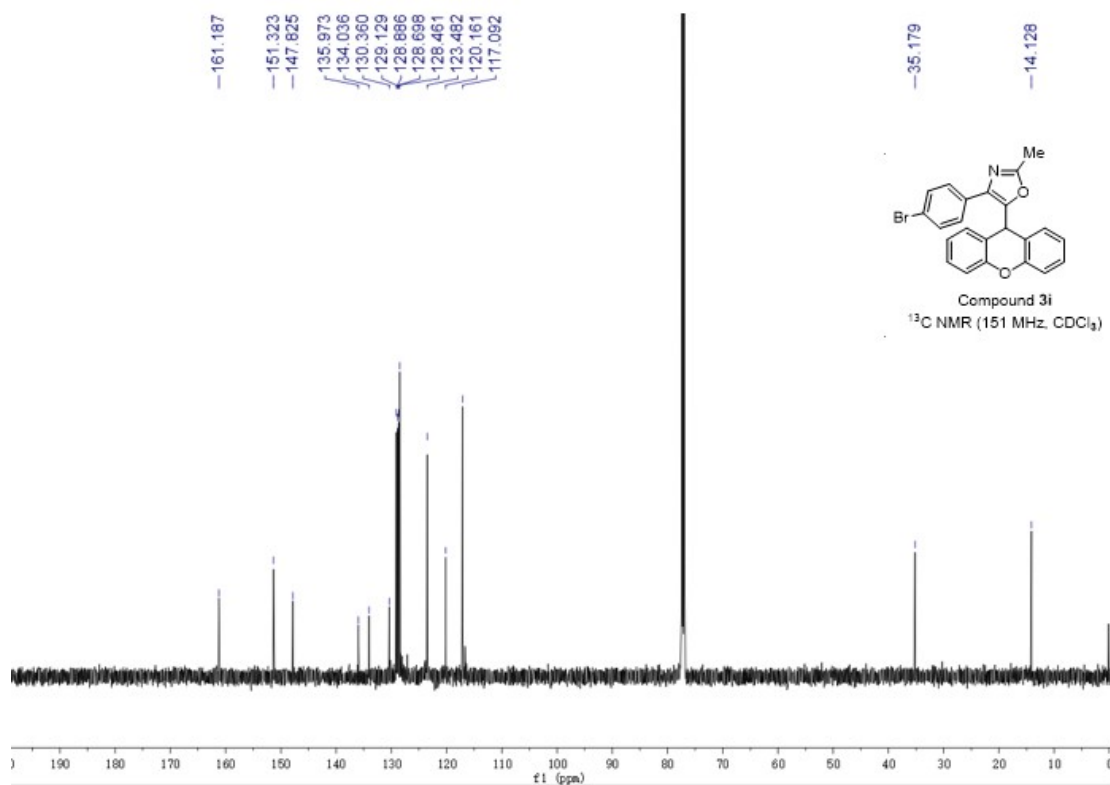

NMR spectra of 4-([1,1'-Biphenyl]-4-yl)-2-methyl-5-(9H-xanthen-9-yl)oxazole (**3j**)

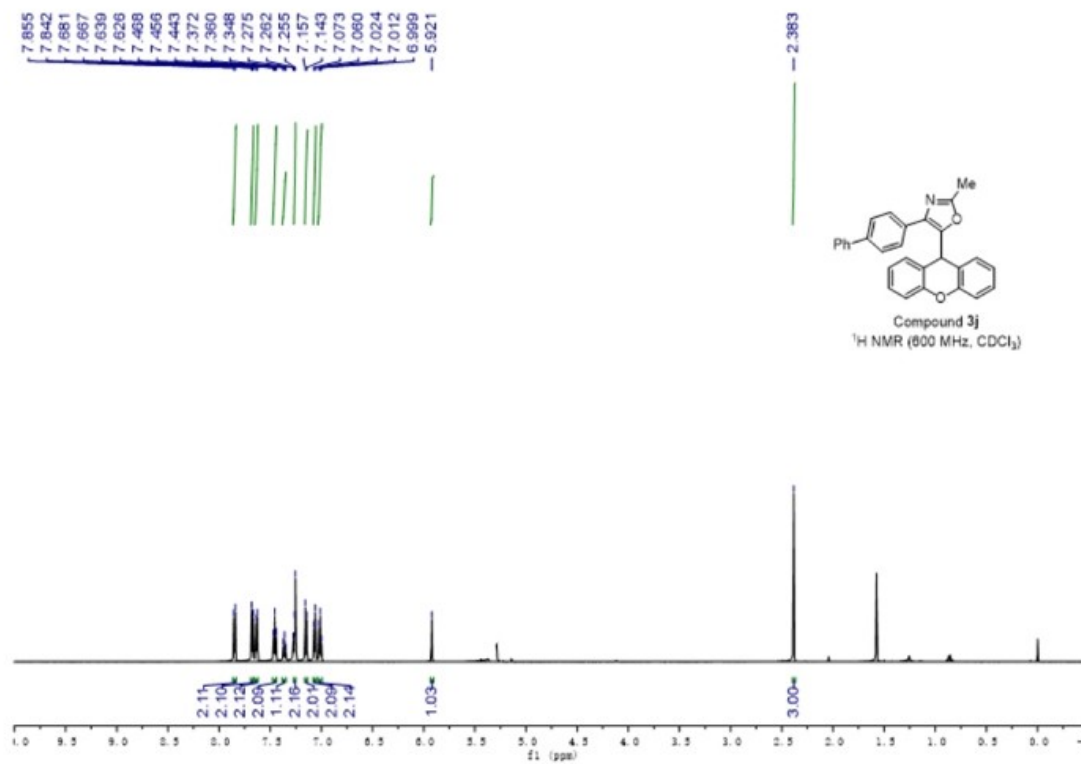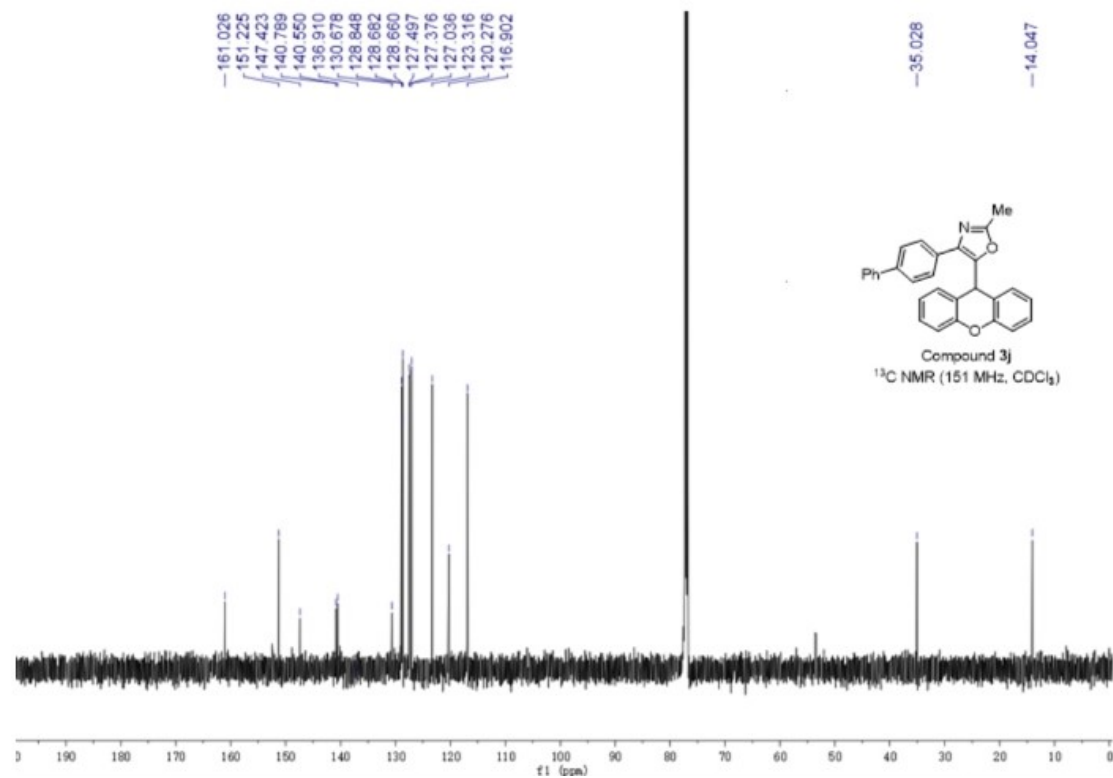

NMR spectra of 2-methyl-4-(m-tolyl)-5-(9*H*-xanthen-9-yl)oxazole (**3k**)

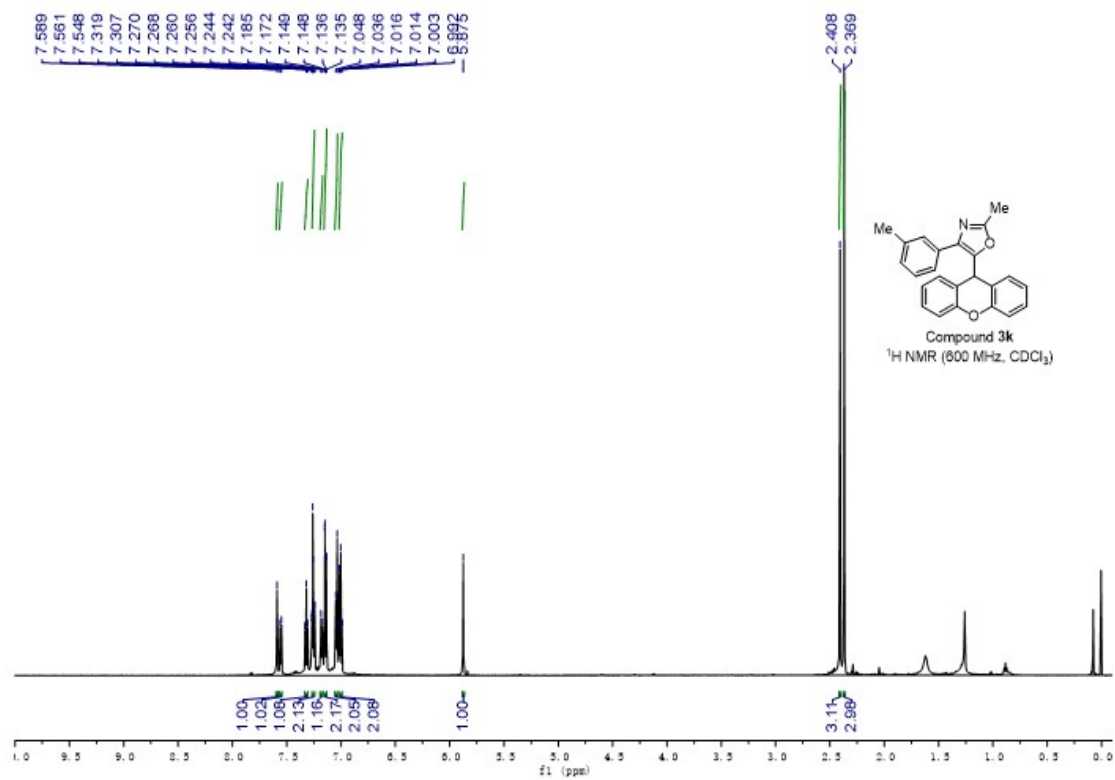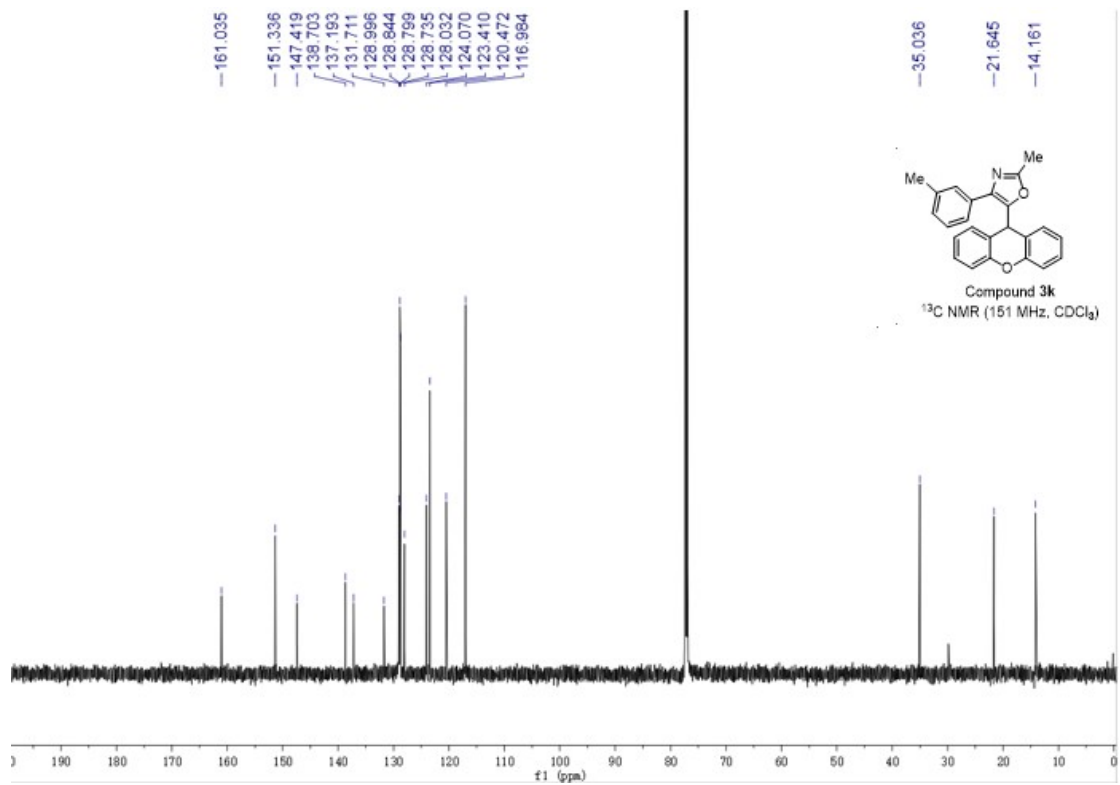

NMR spectra of 4-(3-methoxyphenyl)-2-methyl-5-(9H-xanthen-9-yl)oxazole (31)

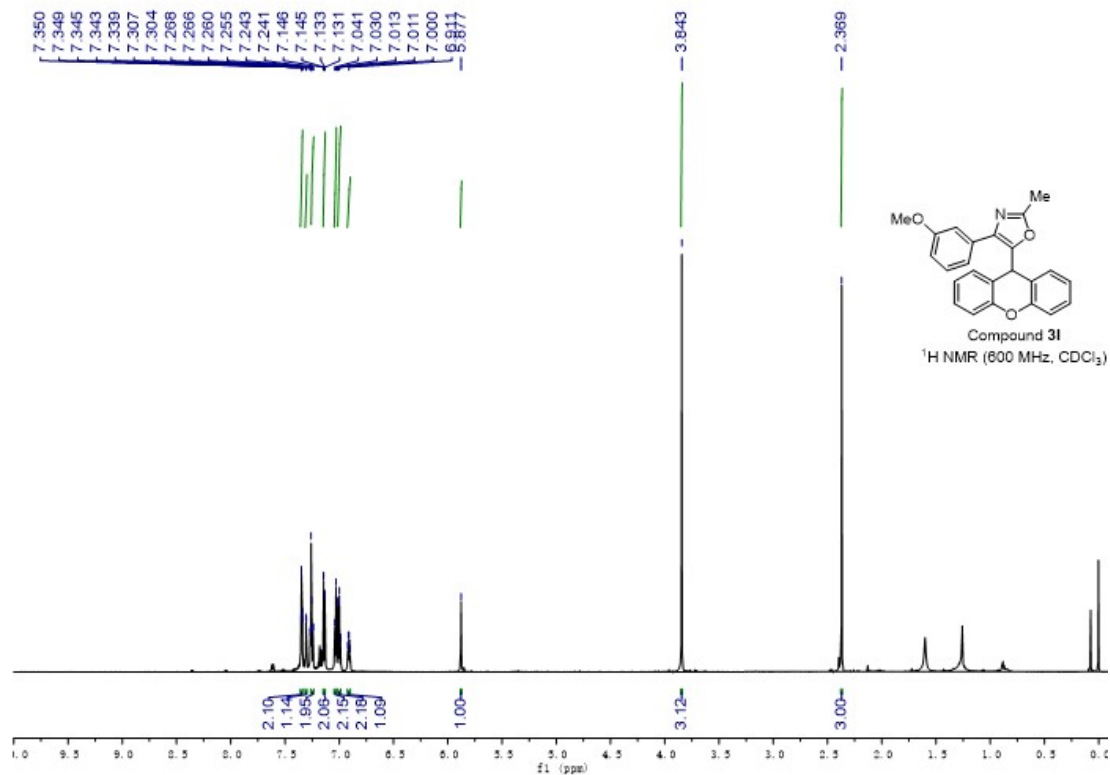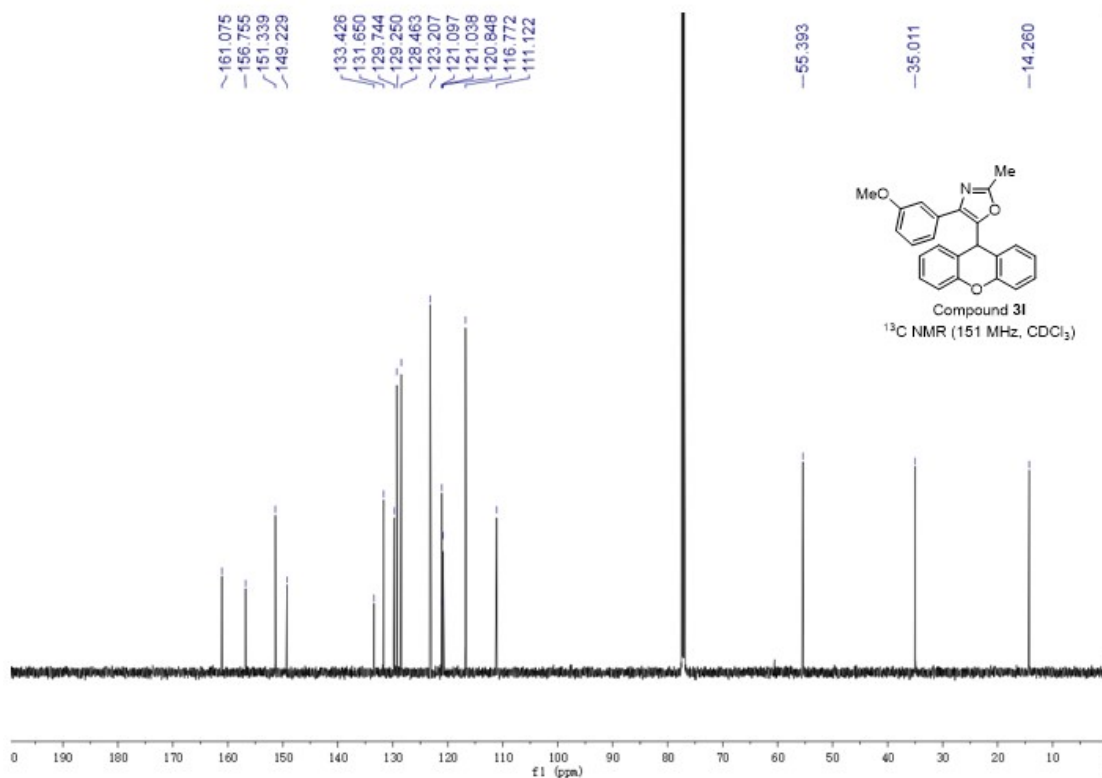

NMR spectra of 2-methyl-4-(*o*-tolyl)-5-(9*H*-xanthen-9-yl)oxazole (**3m**)

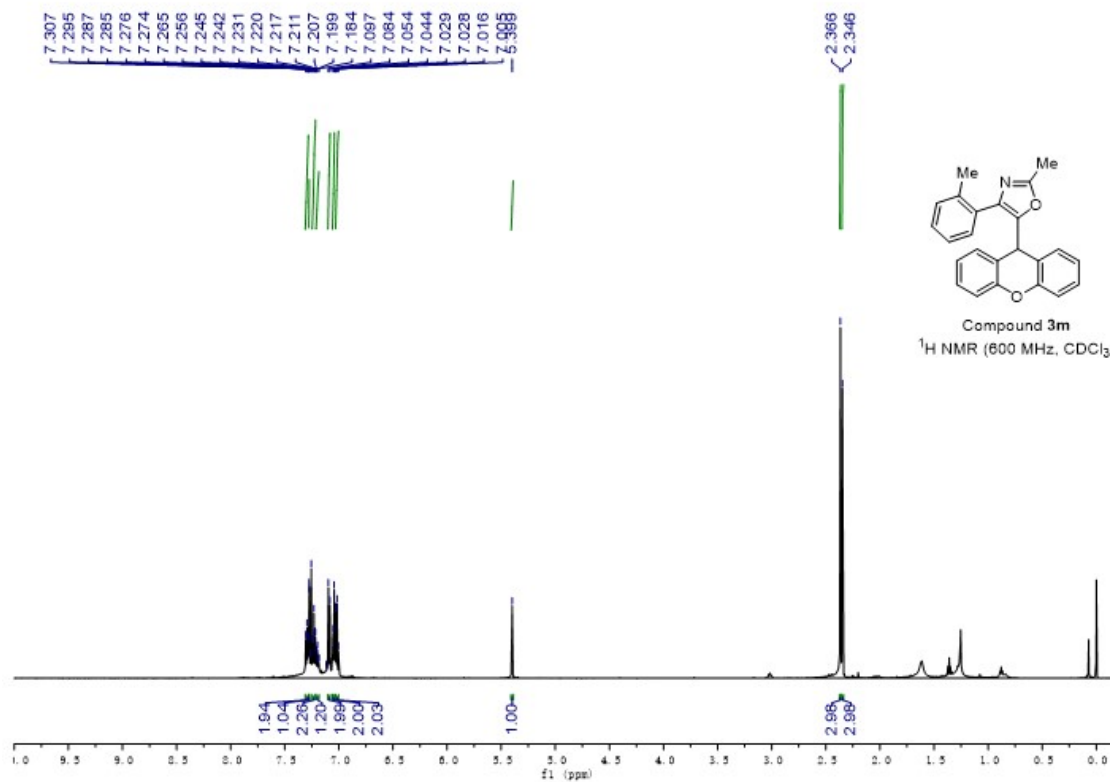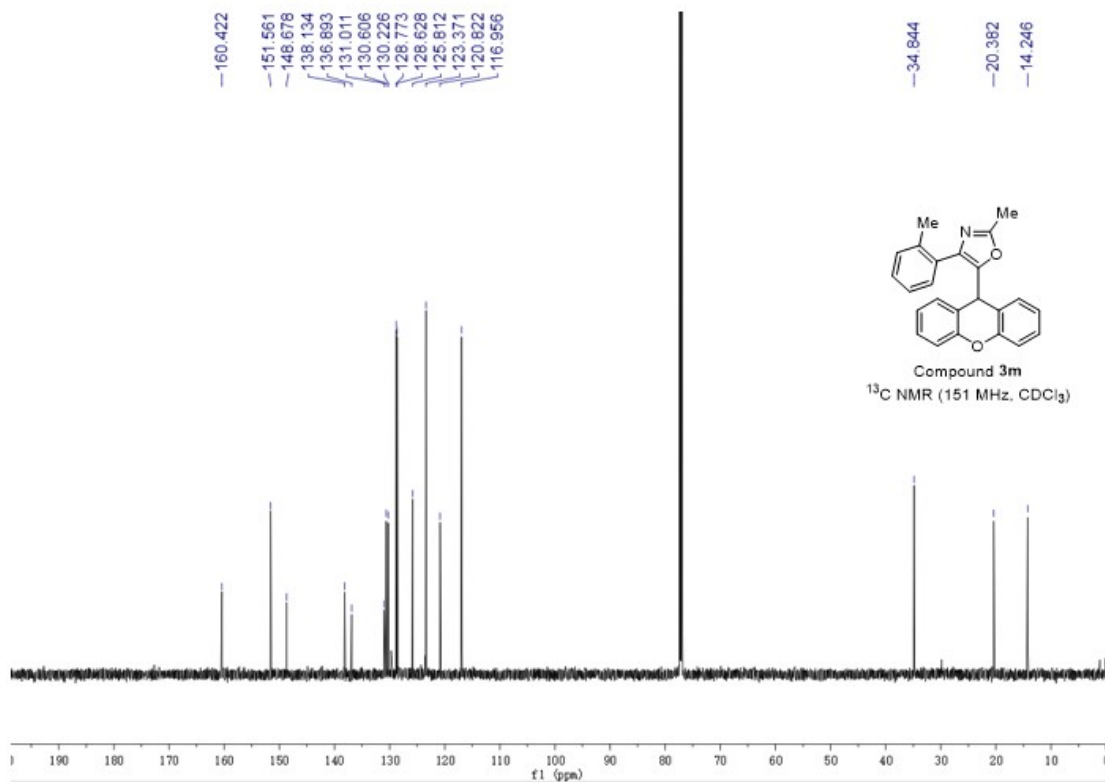

NMR spectra of 4-(2-methoxyphenyl)-2-methyl-5-(9*H*-xanthen-9-yl)oxazole (**3n**)

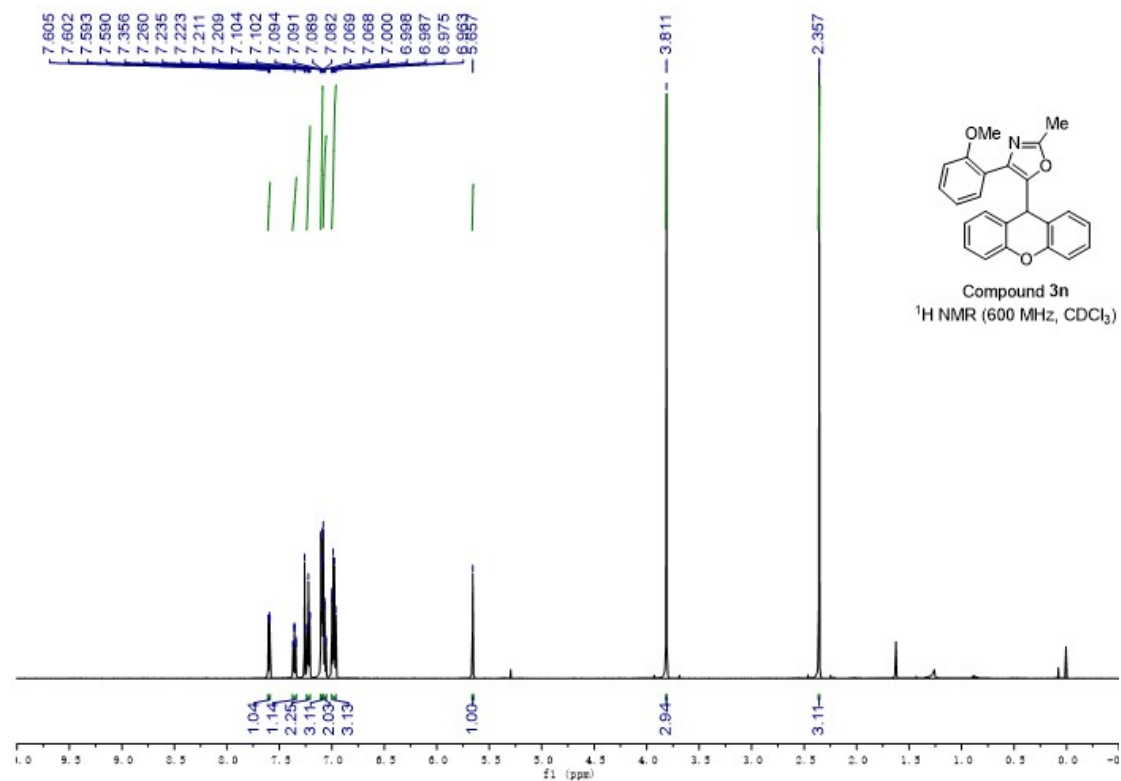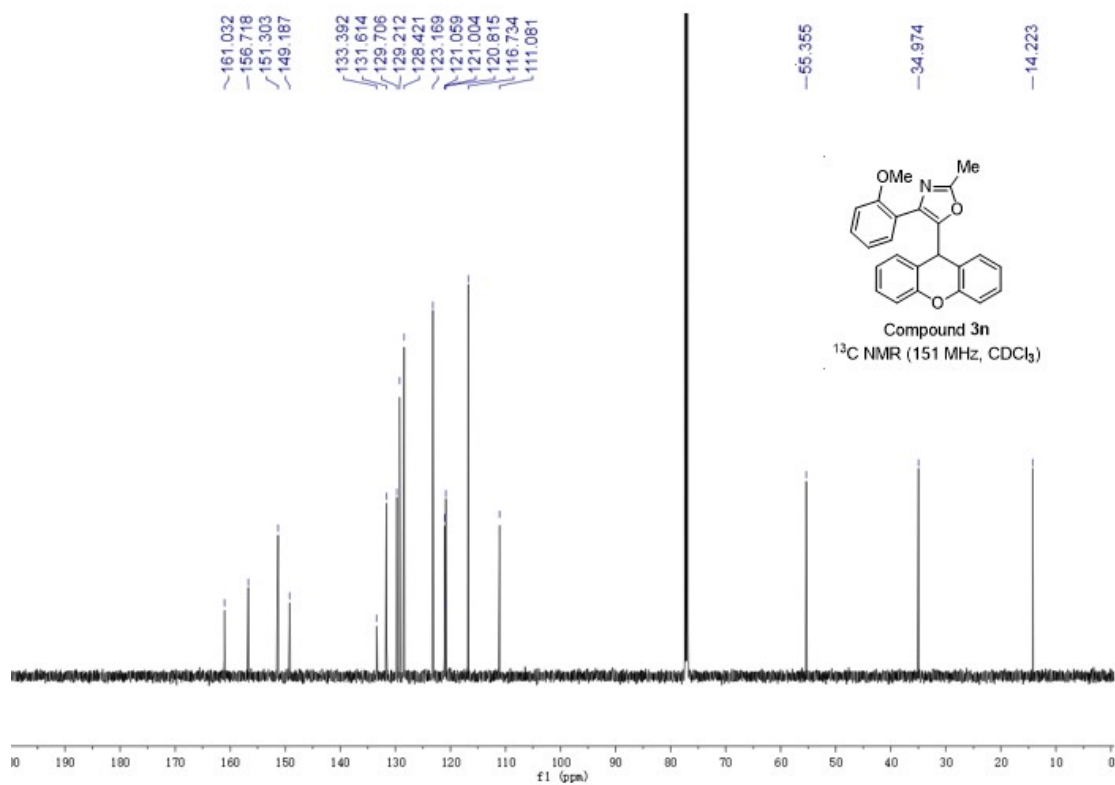

NMR spectra of 4-(2-fluorophenyl)-2-methyl-5-(9*H*-xanthen-9-yl)oxazole (**3o**)

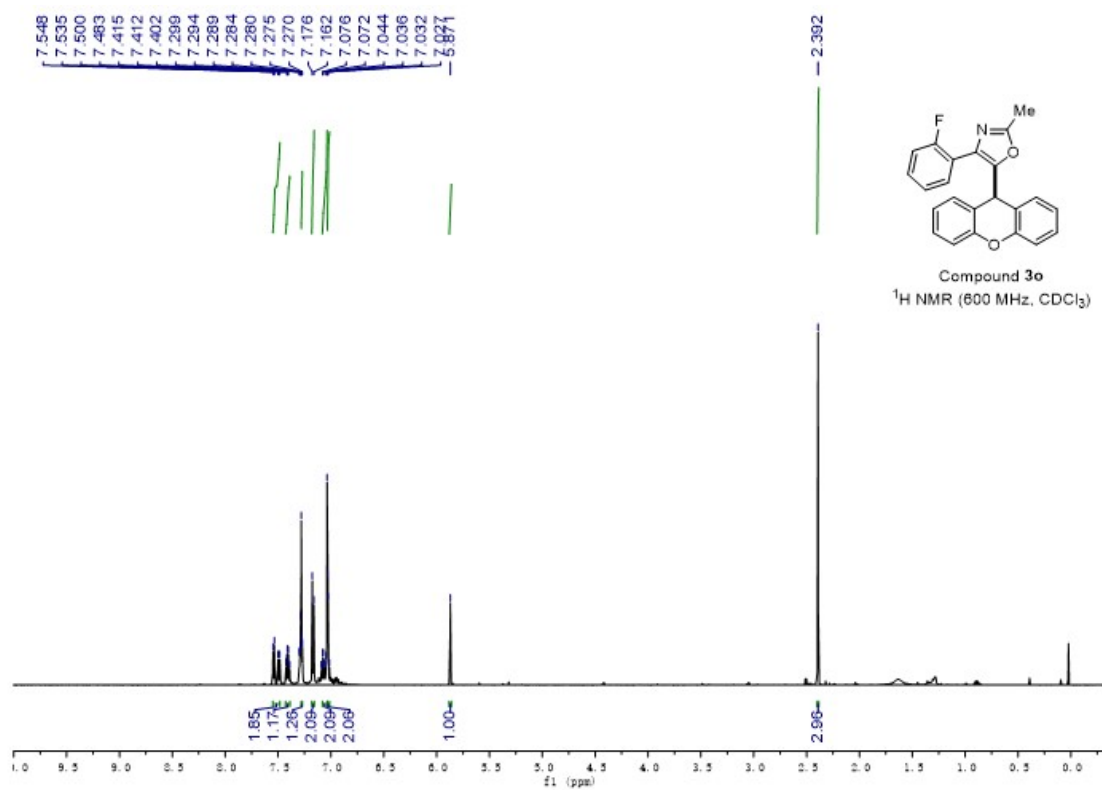



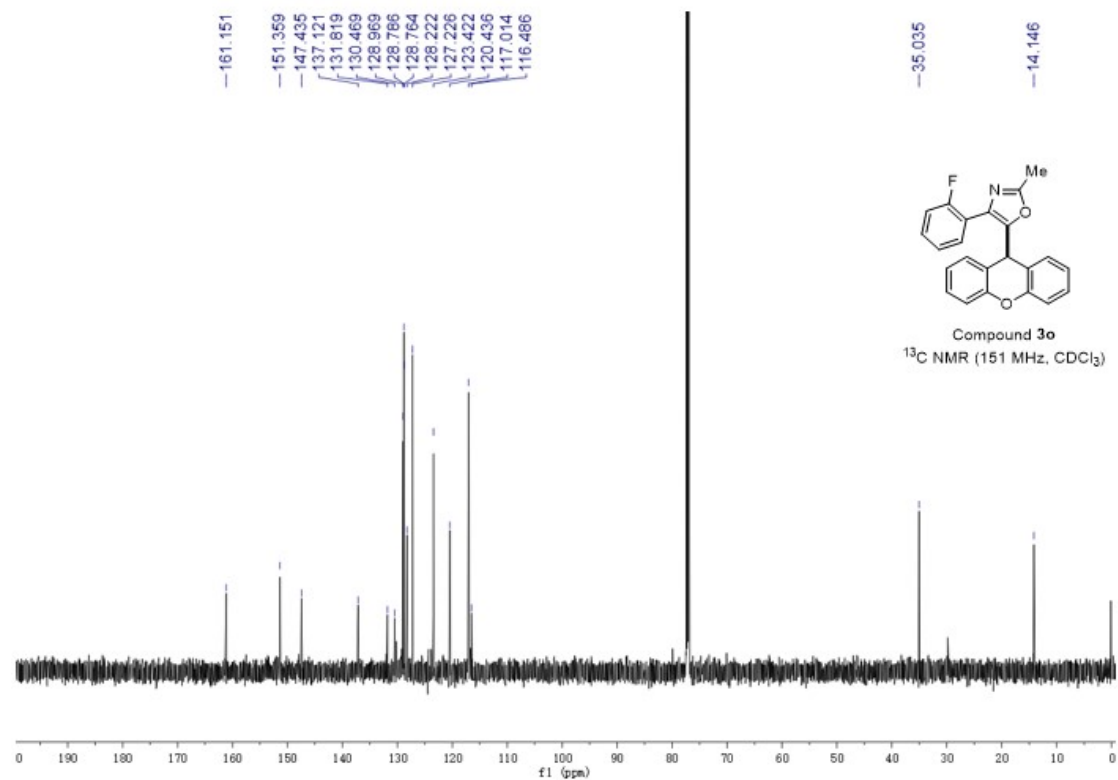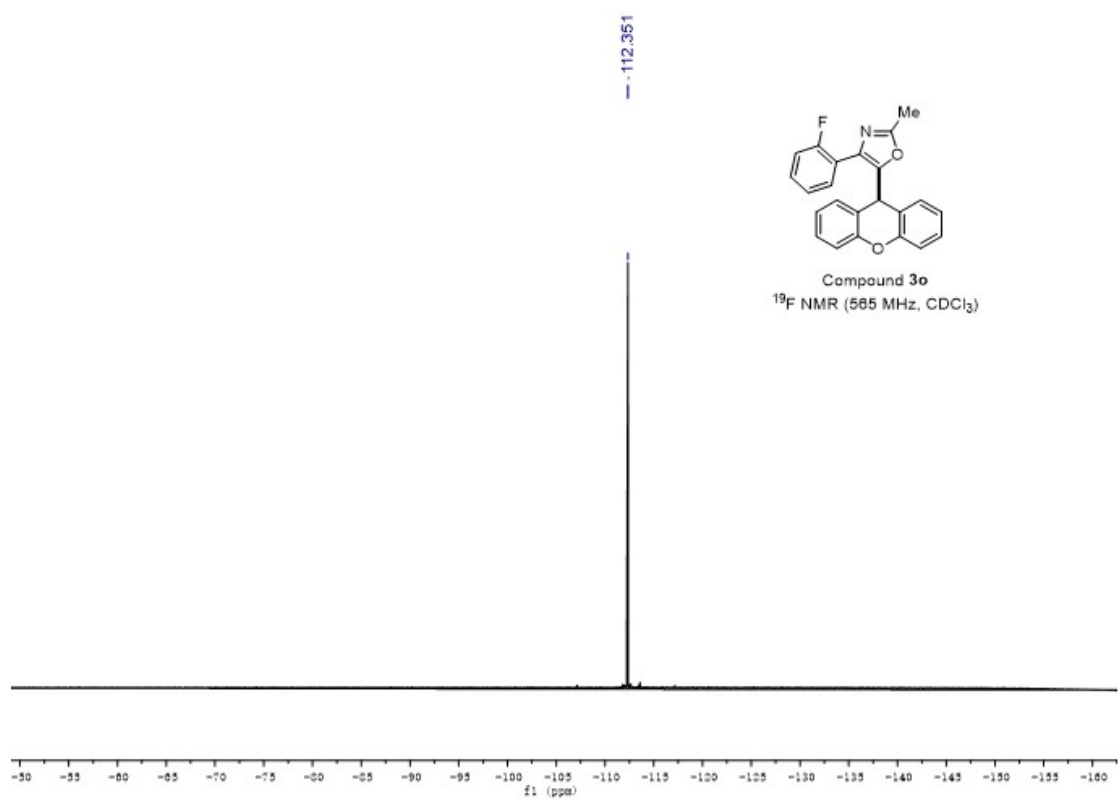

NMR spectra of 2-Methyl-4-(naphthalen-1-yl)-5-(9H-xanthen-9-yl)oxazole (**3p**)

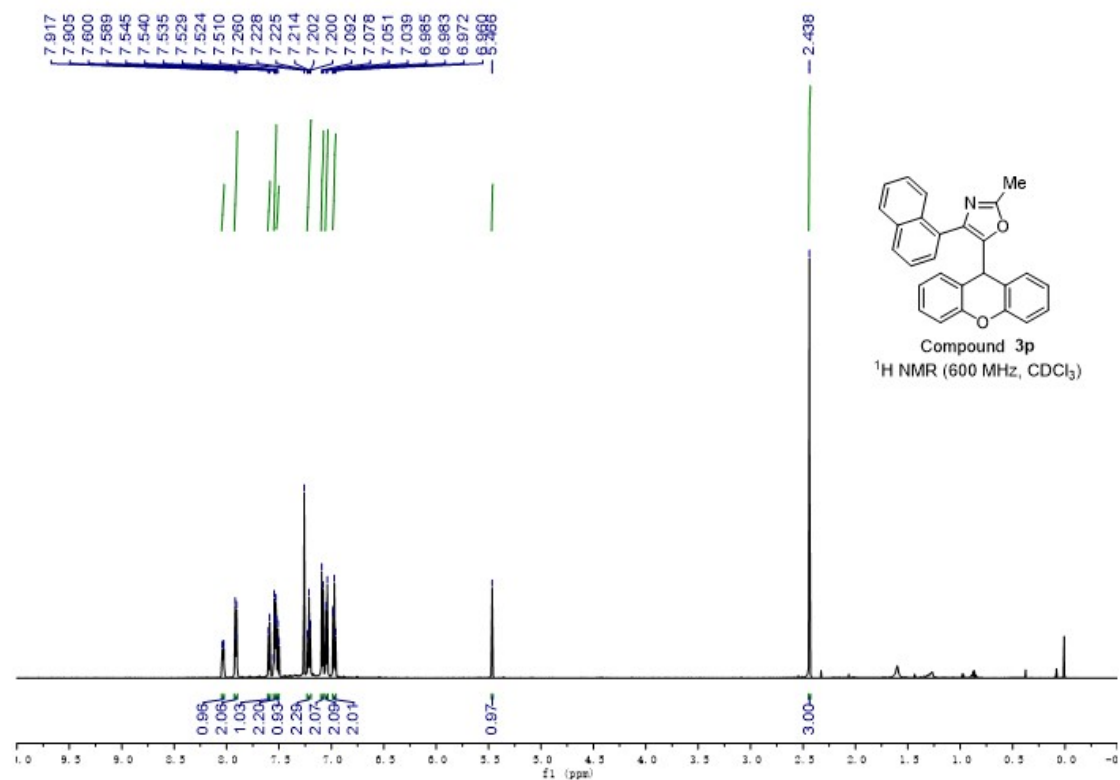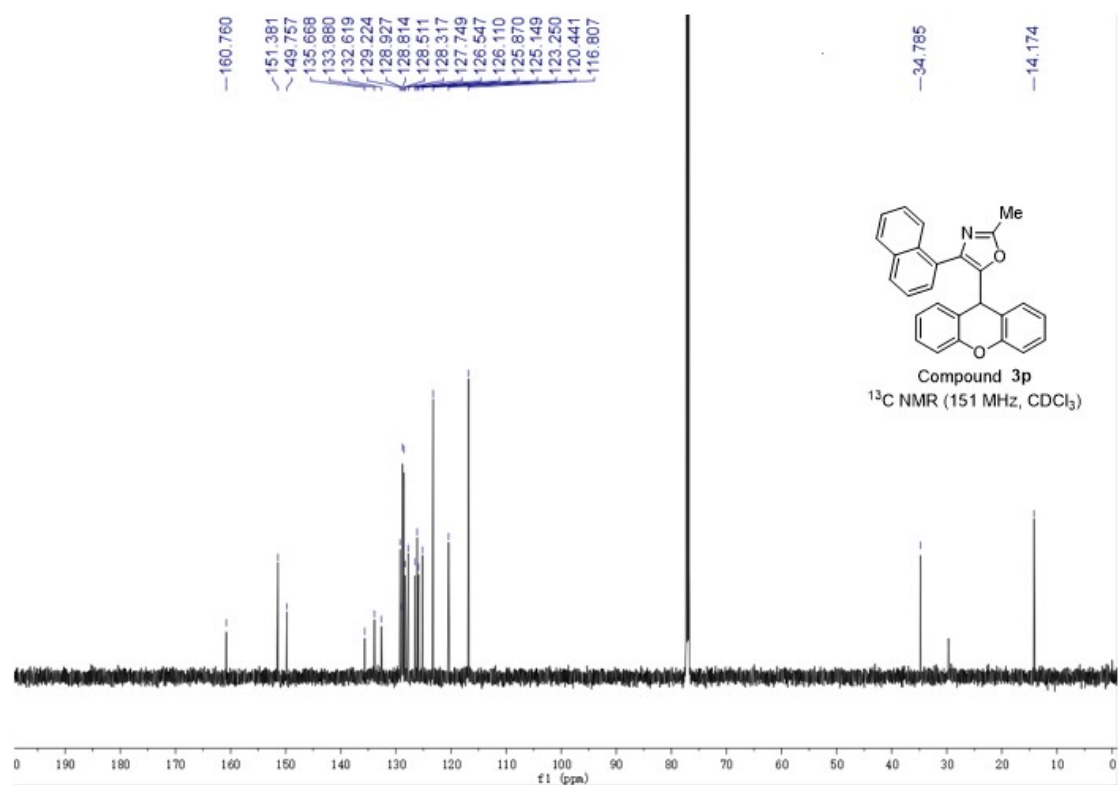

NMR spectra of 2-Methyl-4-(thiophen-2-yl)-5-(9*H*-xanthen-9-yl)oxazole (**3q**)

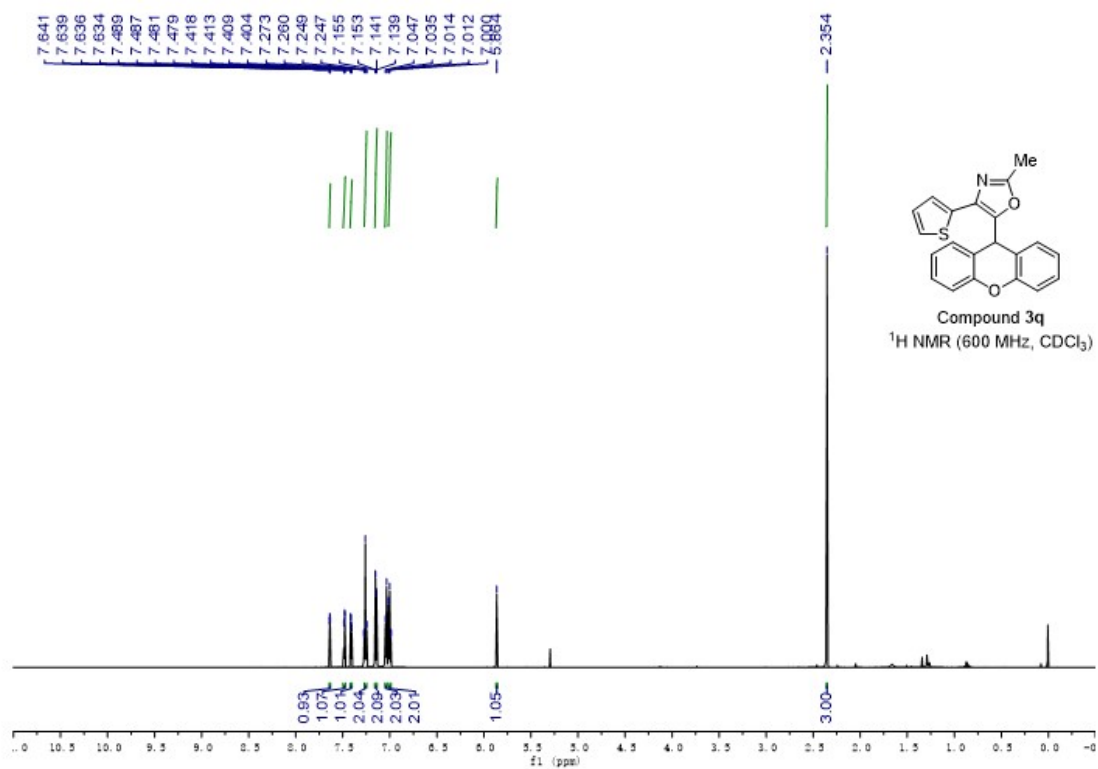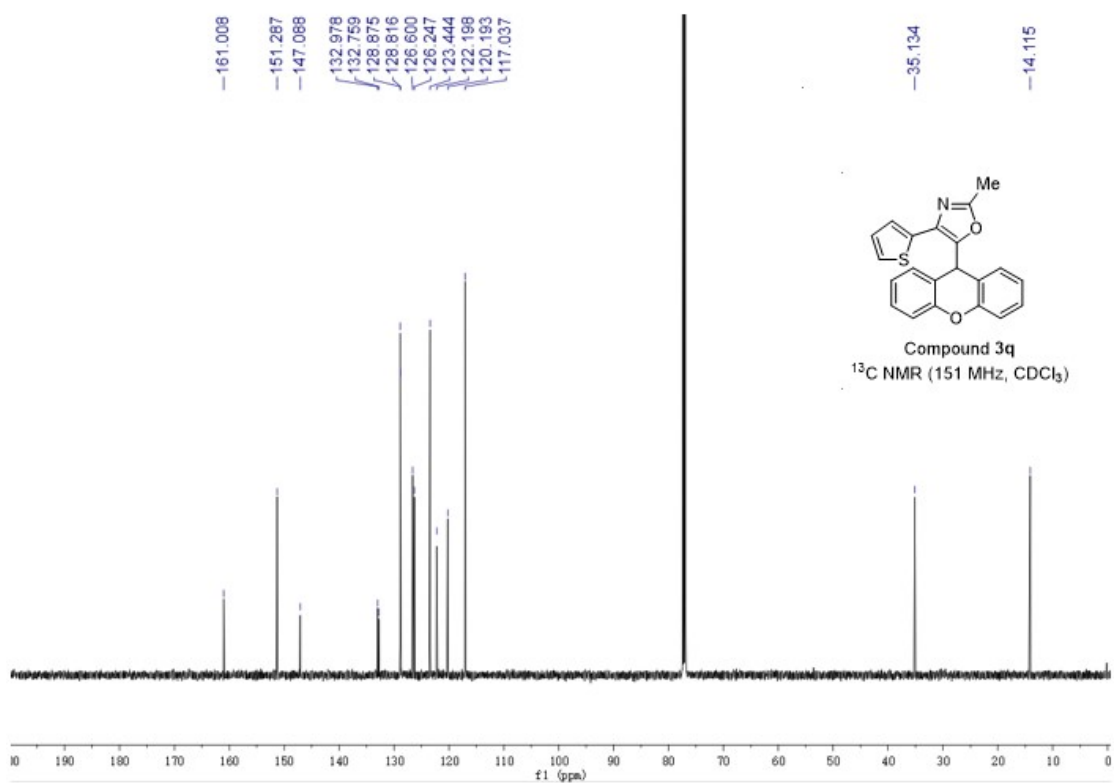

NMR spectra of 2-Methyl-5-(4-methyl-9*H*-xanthen-9-yl)-4-phenyloxazole (**4a**)

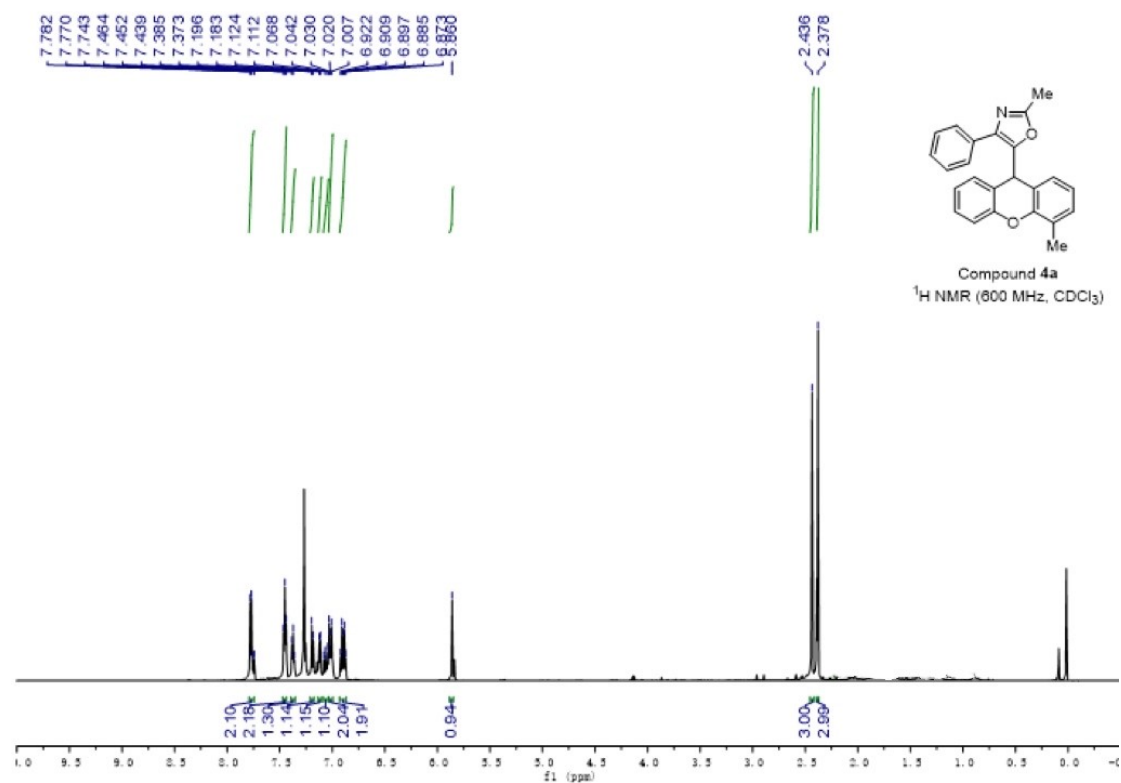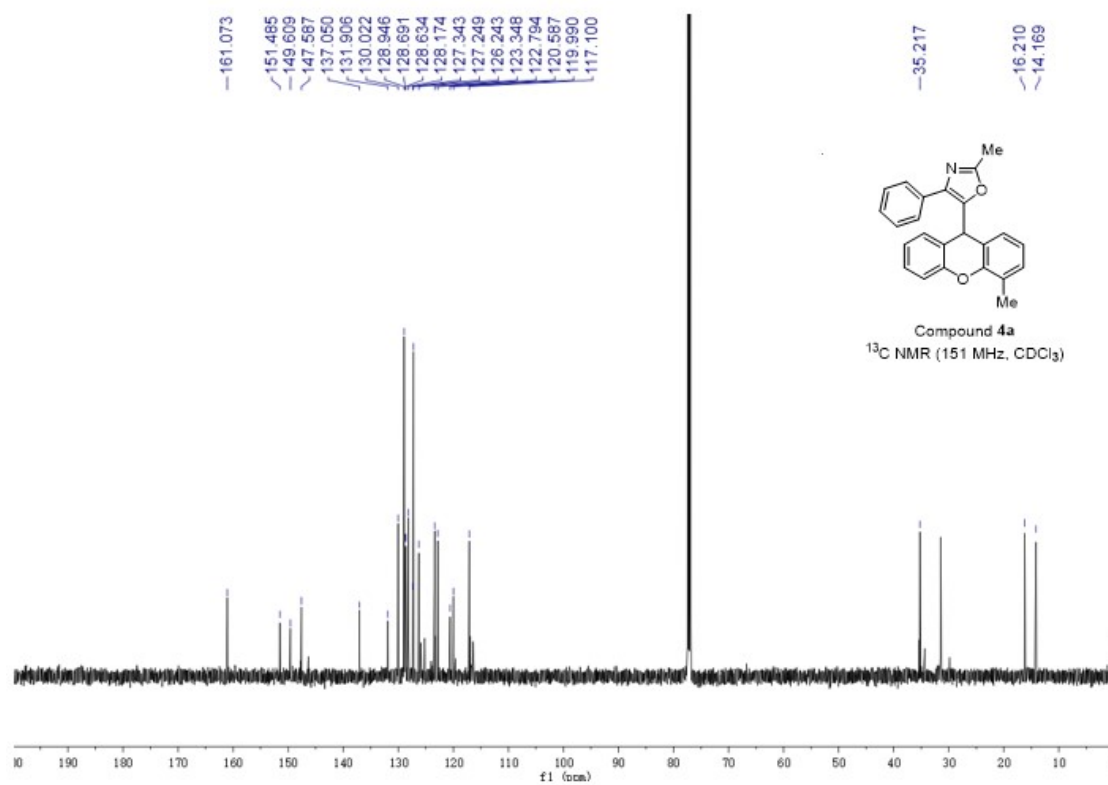

NMR spectra of 5-(4-(*tert*-butyl)-9*H*-xanthen-9-yl)-2-methyl-4-phenyloxazol (4b)

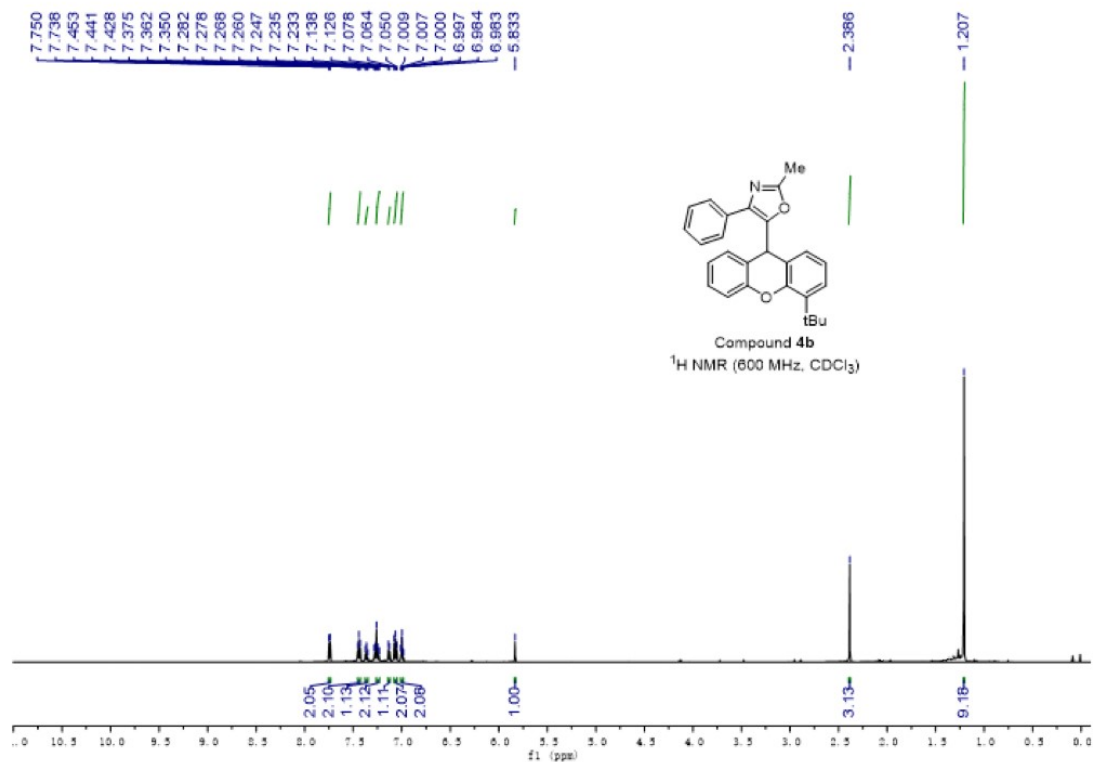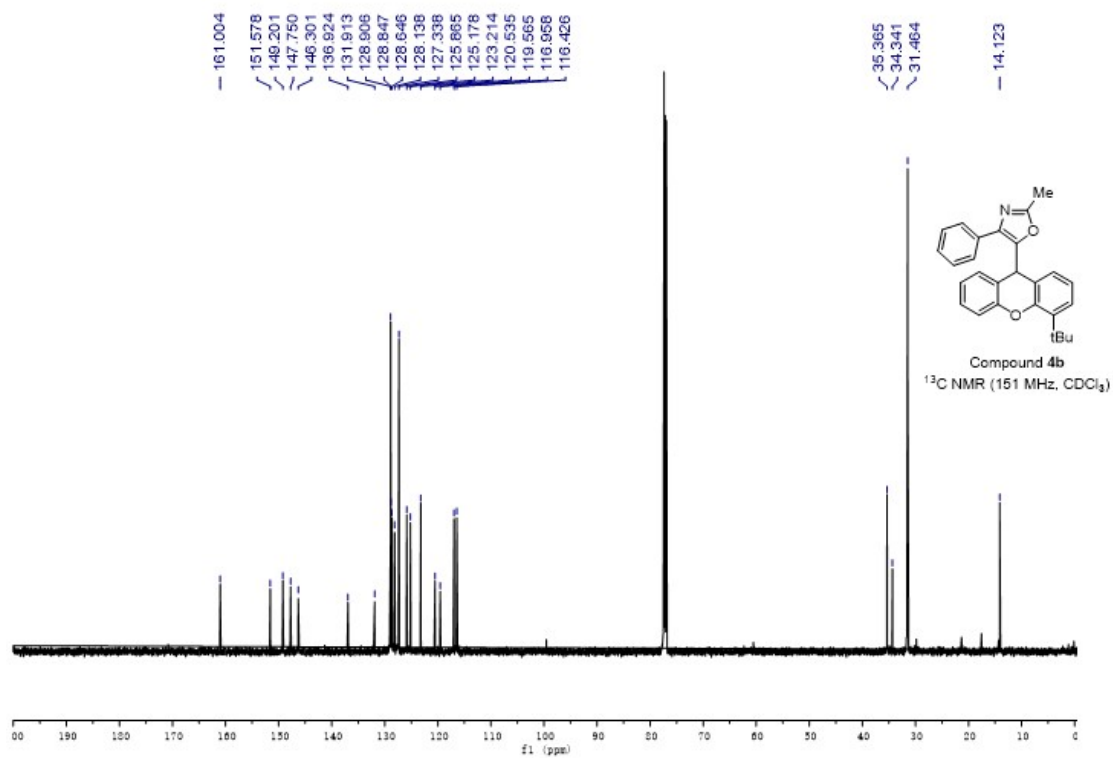

NMR spectra of 5-(4-methoxy-9*H*-xanthen-9-yl)-2-methyl-4-phenyloxazol (4c)

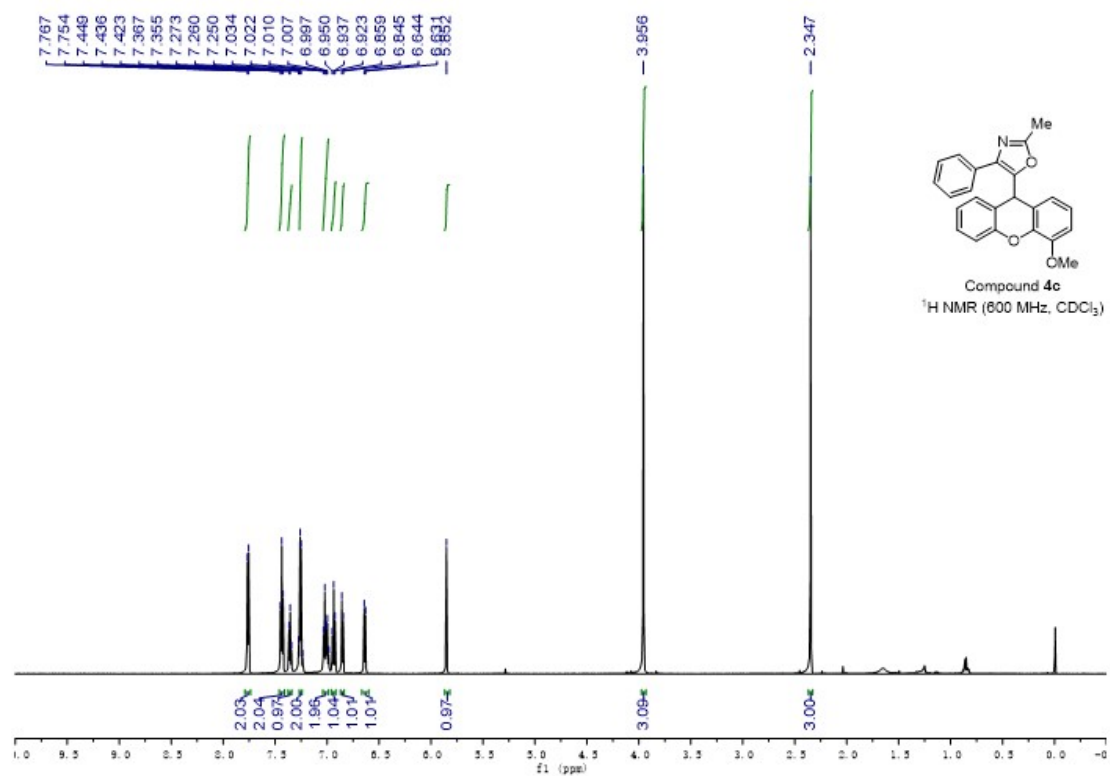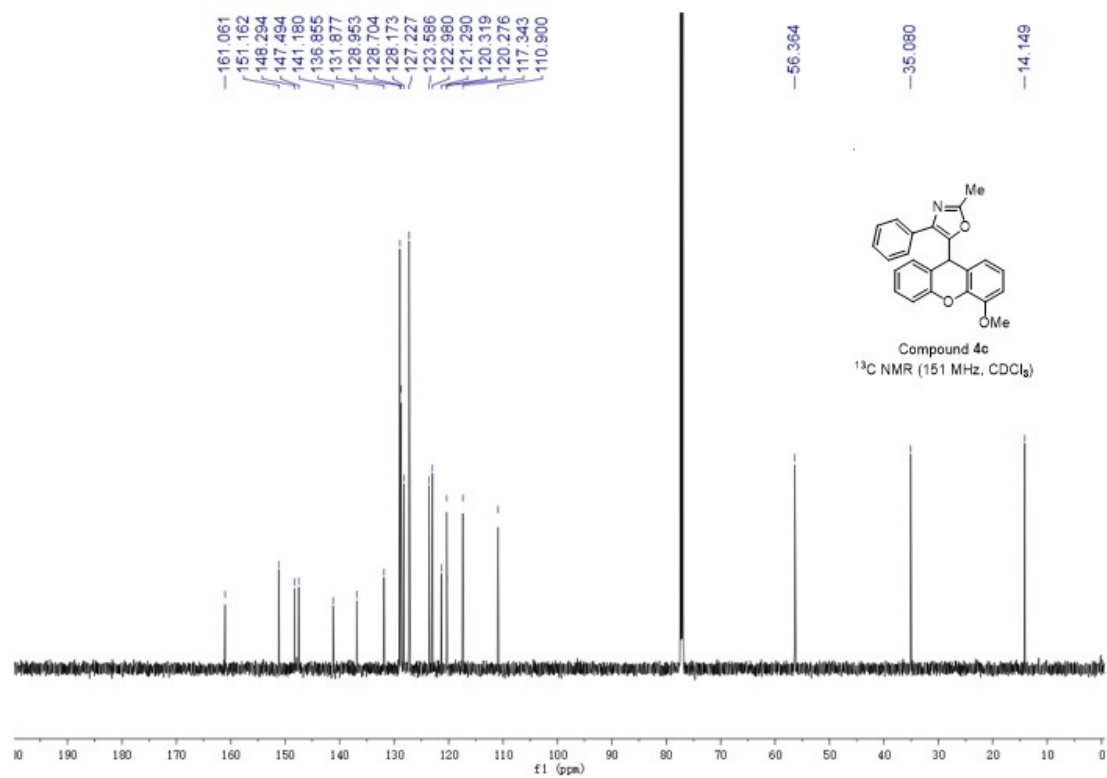

NMR spectra of 5-(4-chloro-9*H*-xanthen-9-yl)-2-methyl-4-phenyloxazole (**4d**)

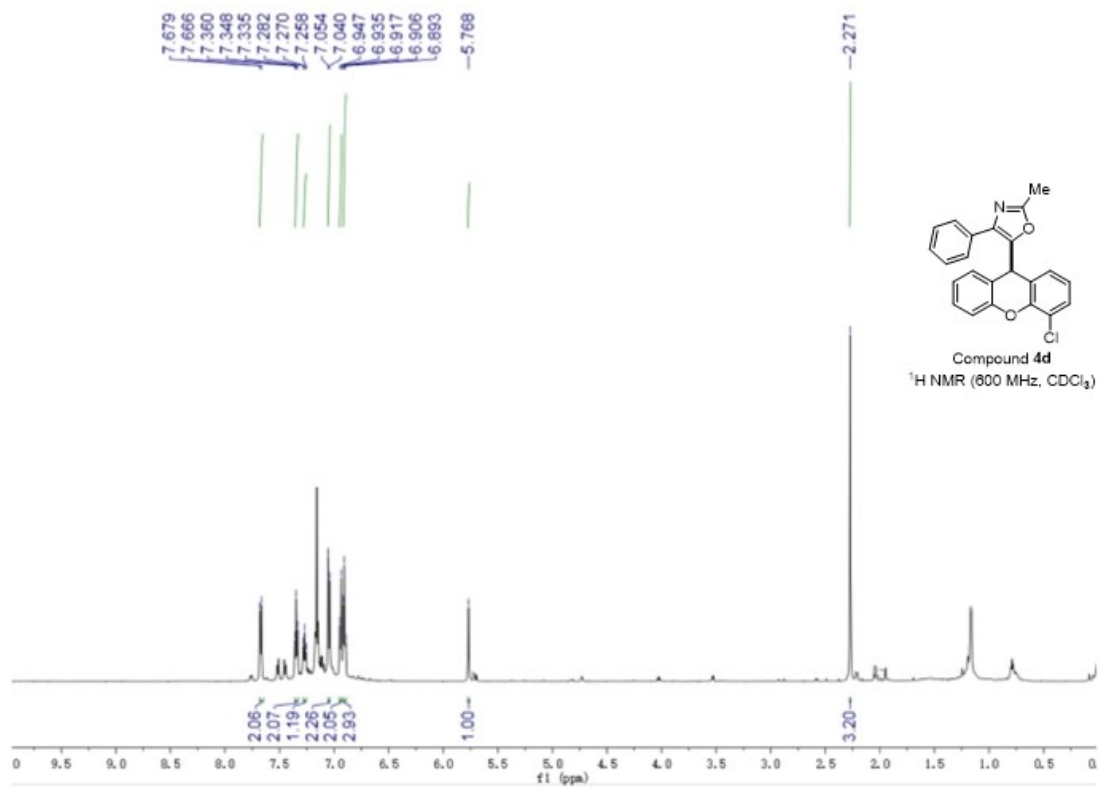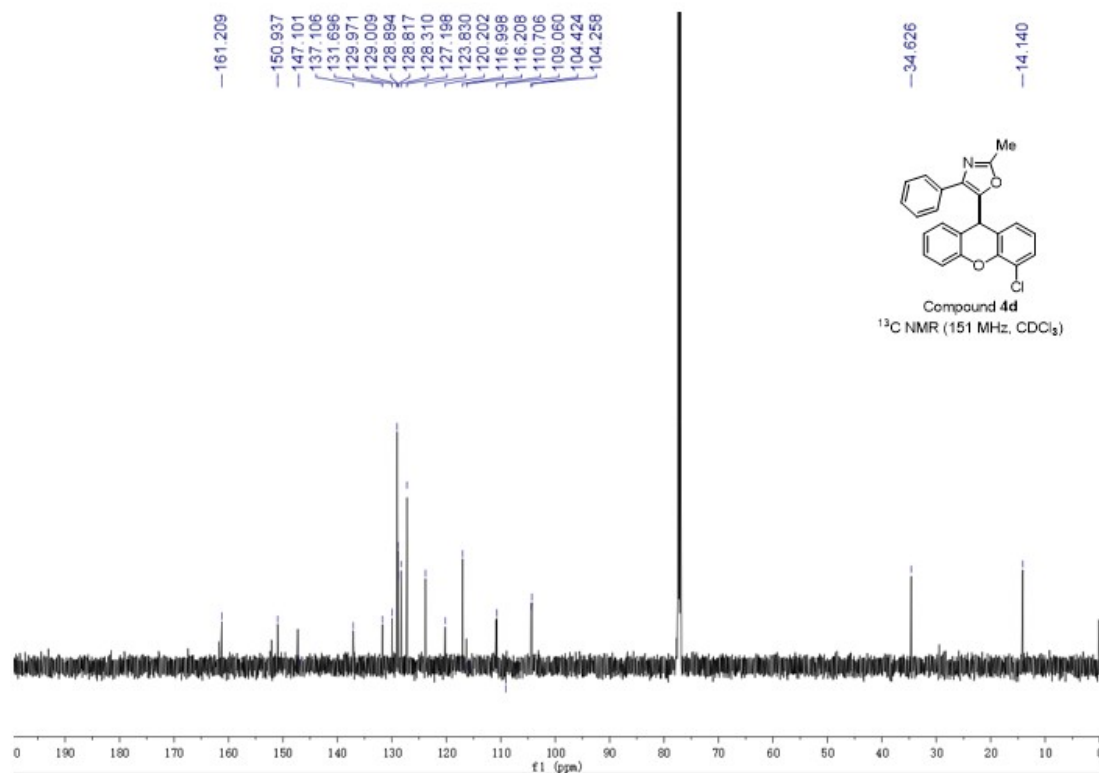

NMR spectra of 2-methyl-4-phenyl-5-(4-phenyl-9*H*-xanthen-9-yl)oxazole (**4e**)

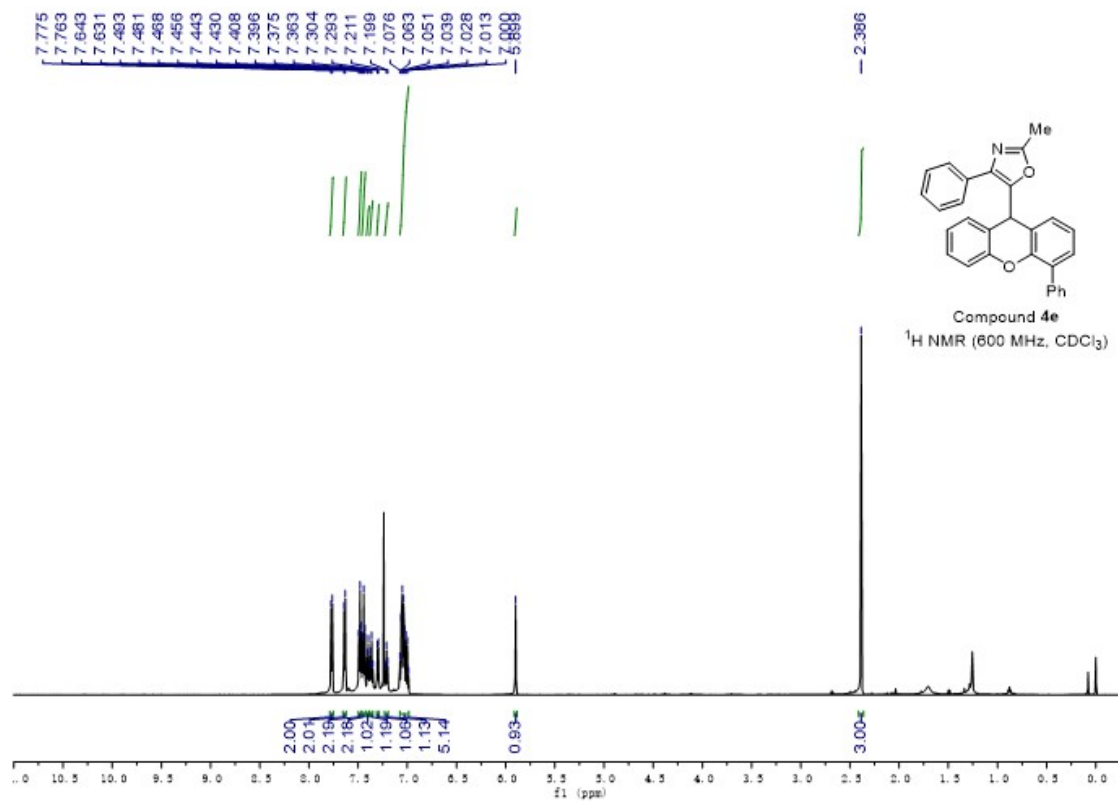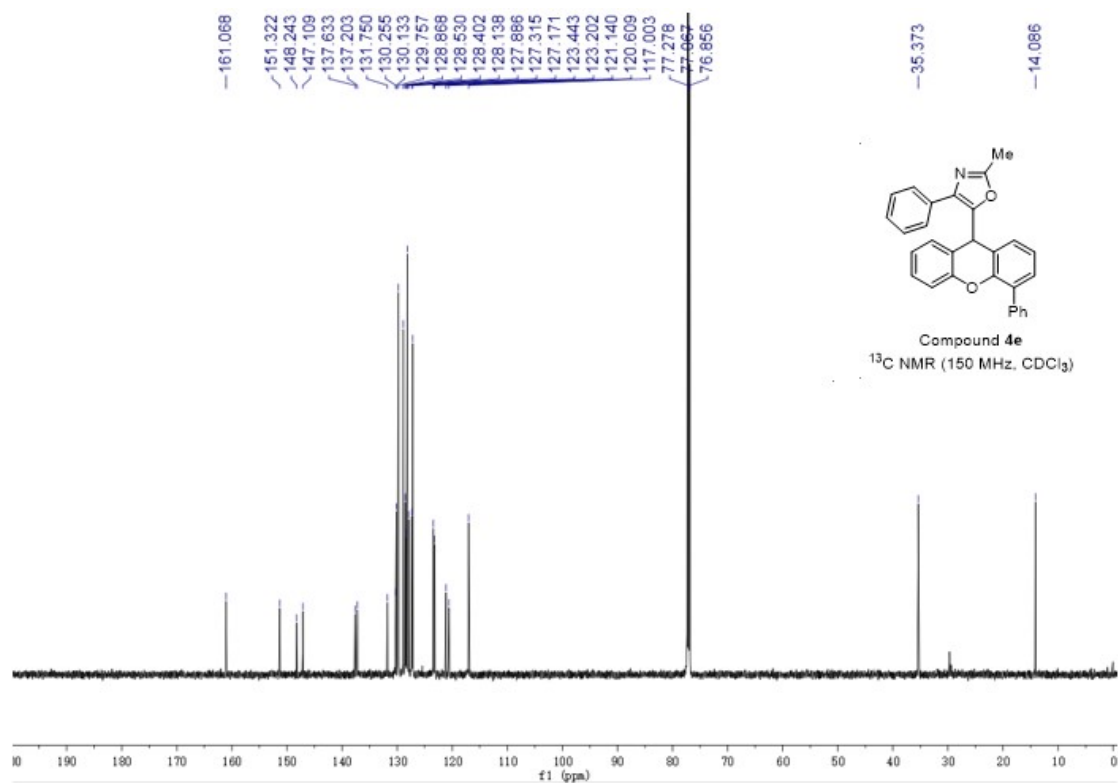

NMR spectra of 2-methyl-4-phenyl-5-(2-phenyl-9*H*-xanthen-9-yl)oxazole (**4f**)



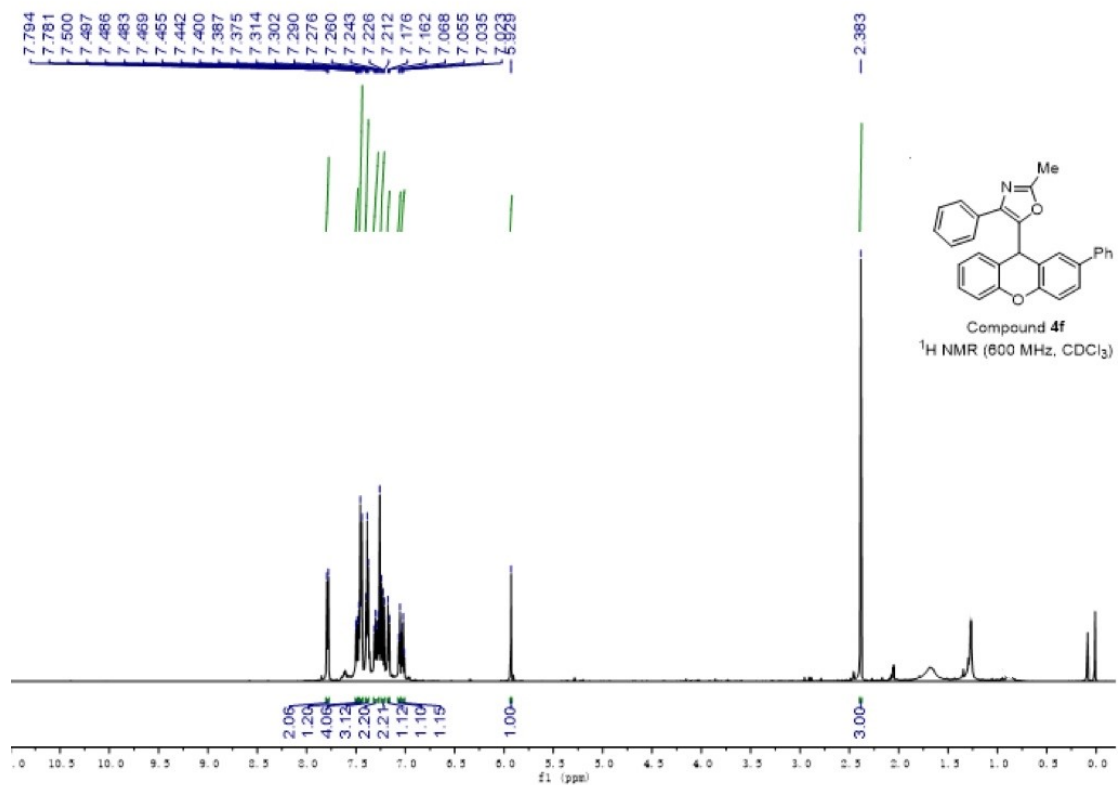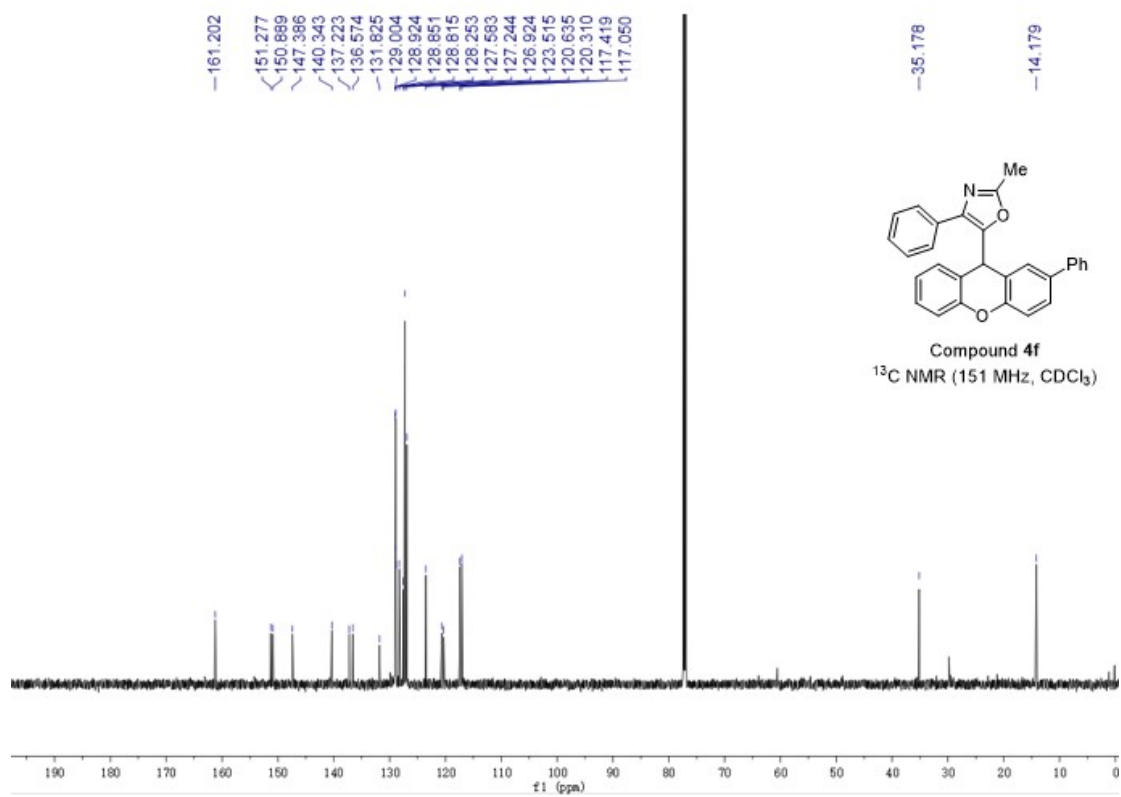

NMR spectra of 2-Methyl-5-(2-methyl-9H-xanthen-9-yl)-4-phenyloxazole (**4g**)

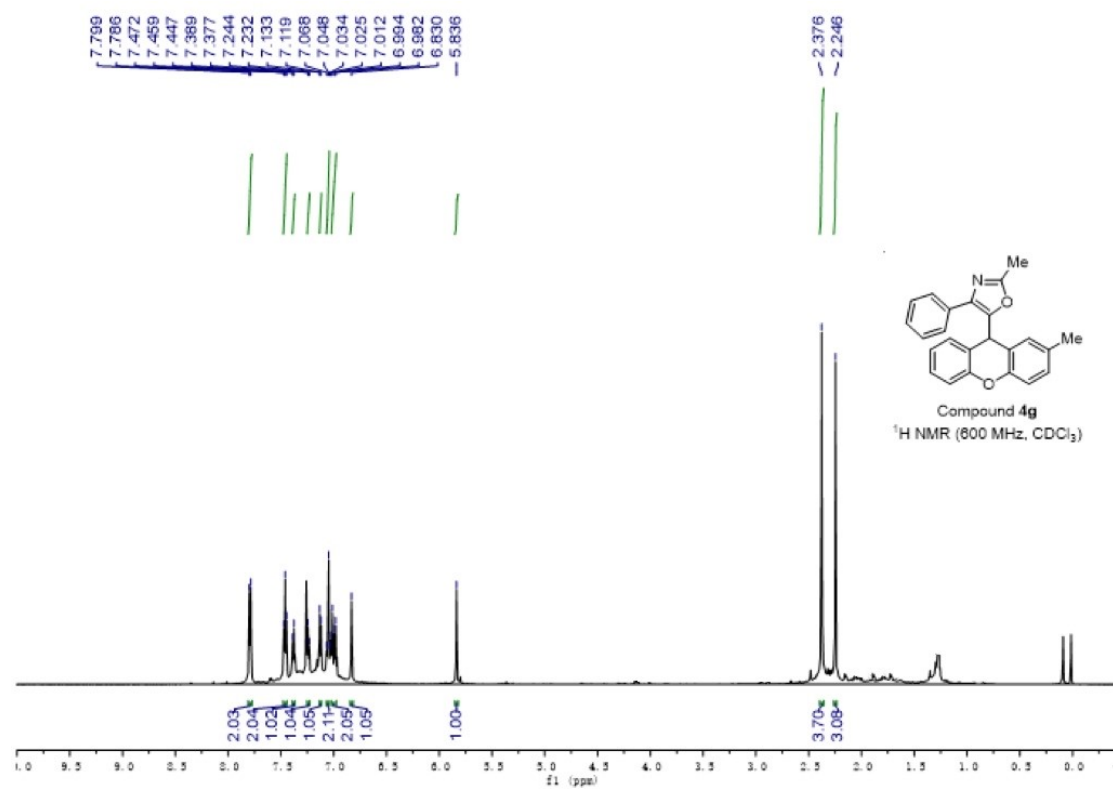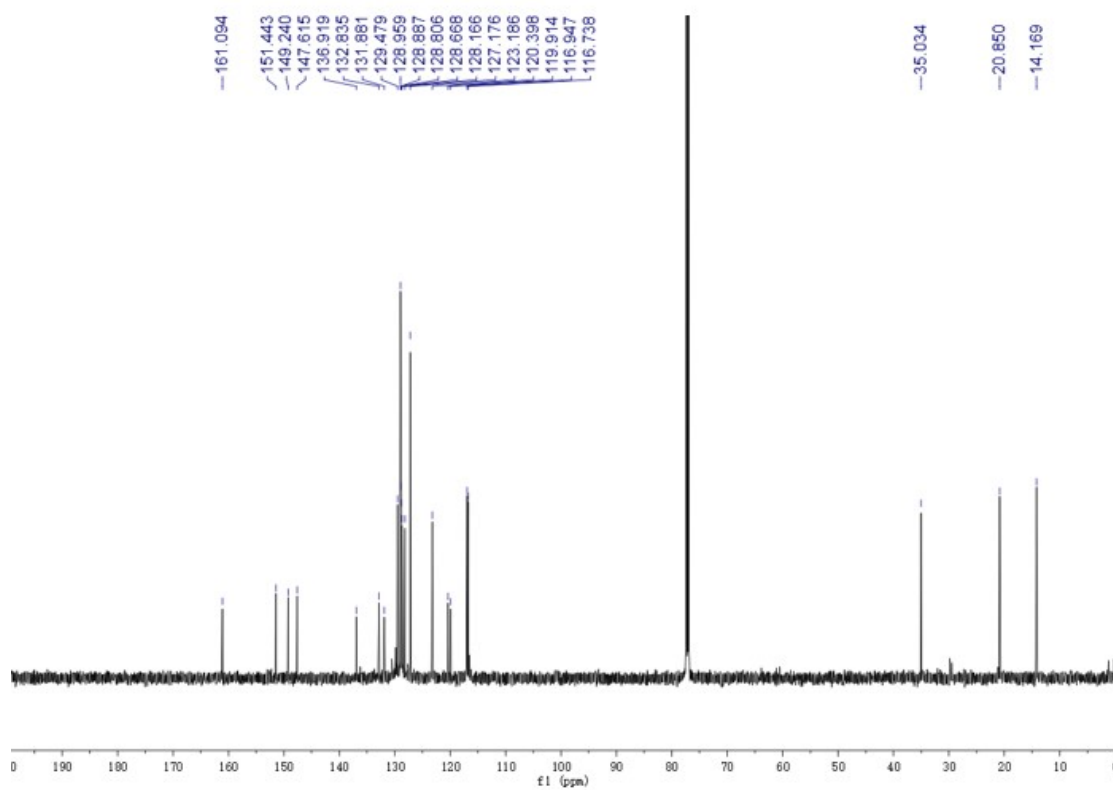

NMR spectra of 5-(2-(*tert*-butyl)-9*H*-xanthen-9-yl)-2-methyl-4-phenyloxazole (**4h**)

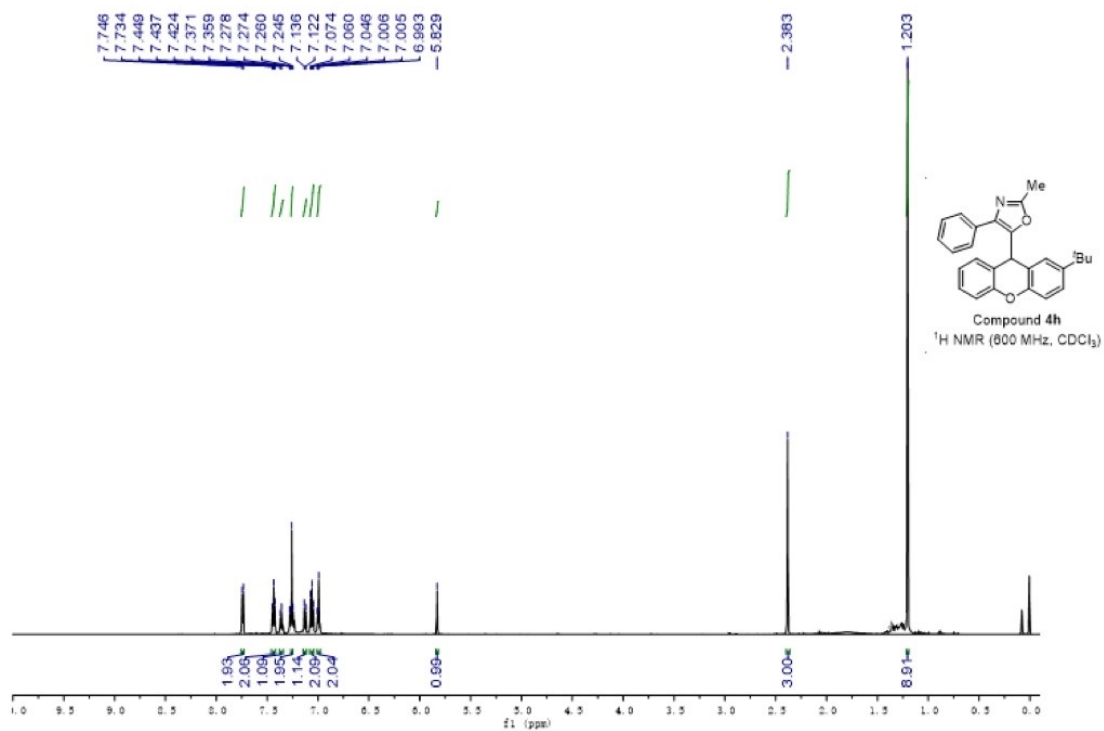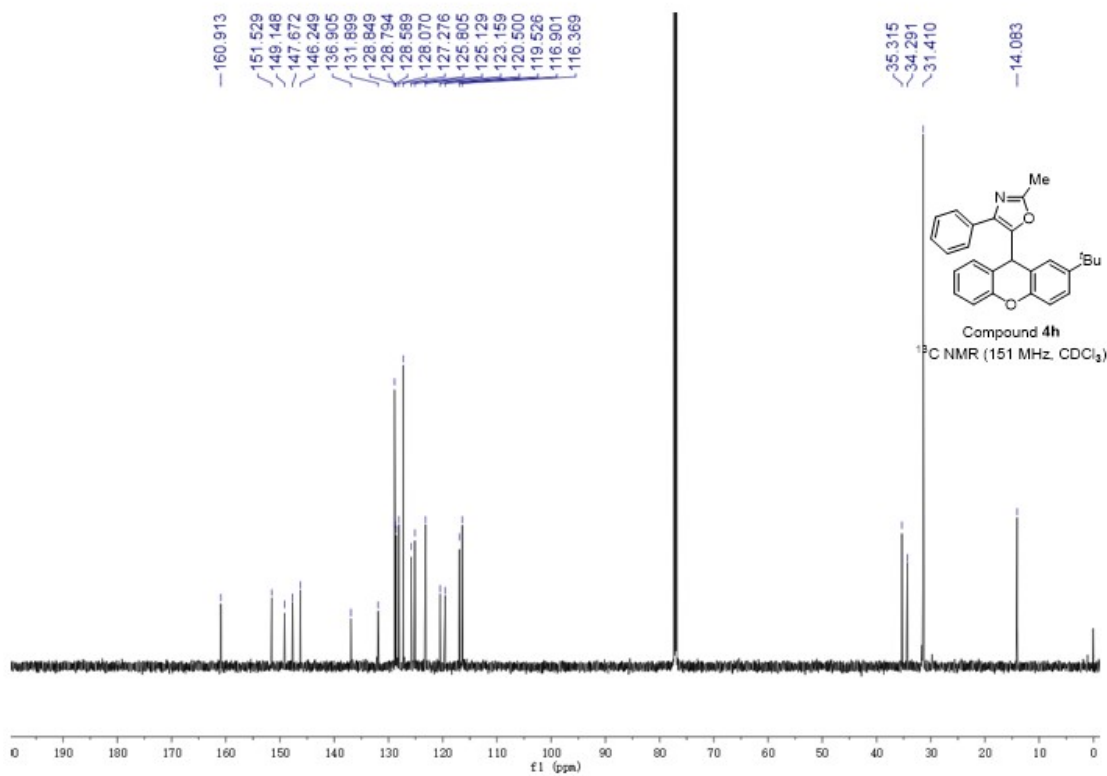

NMR spectra of 2-methyl-4-phenyl-5-(2-(trifluoromethyl)-9H-xanthen-9-yl)oxazole  
**(4i)**

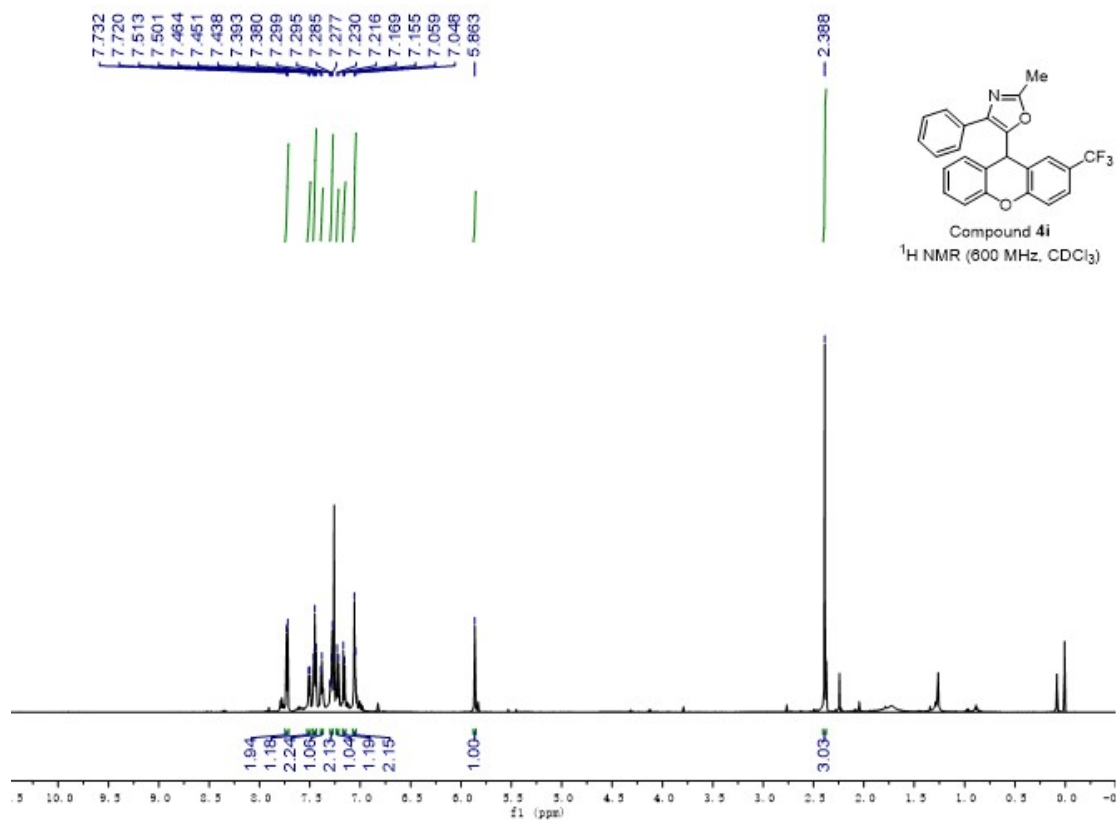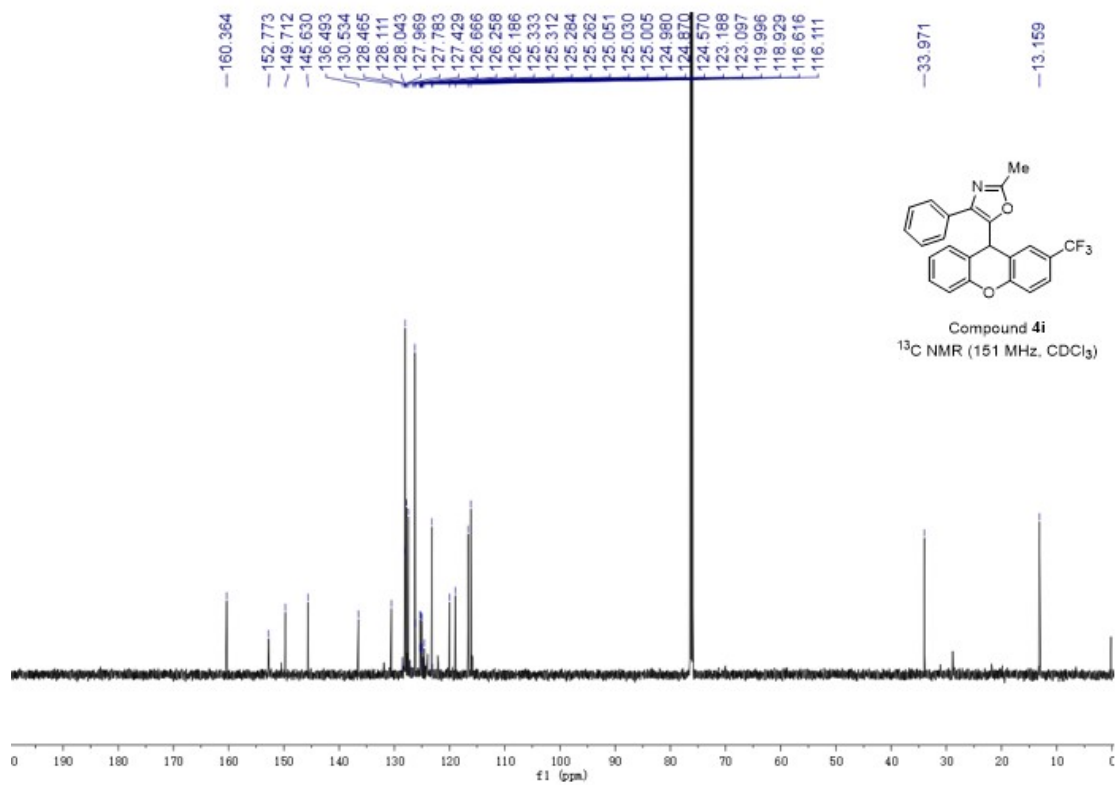

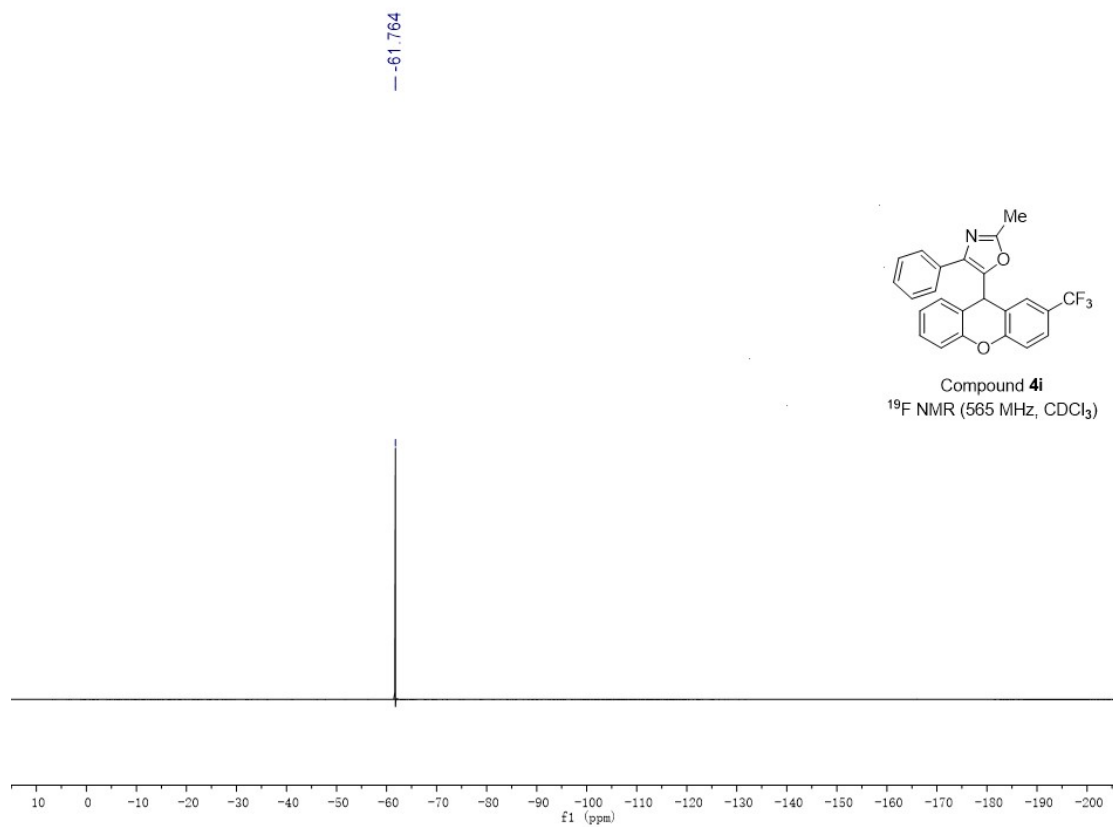

NMR spectra of 5-(1,3-Dimethyl-9*H*-xanthen-9-yl)-2-methyl-4-phenyloxazo (**4j**)

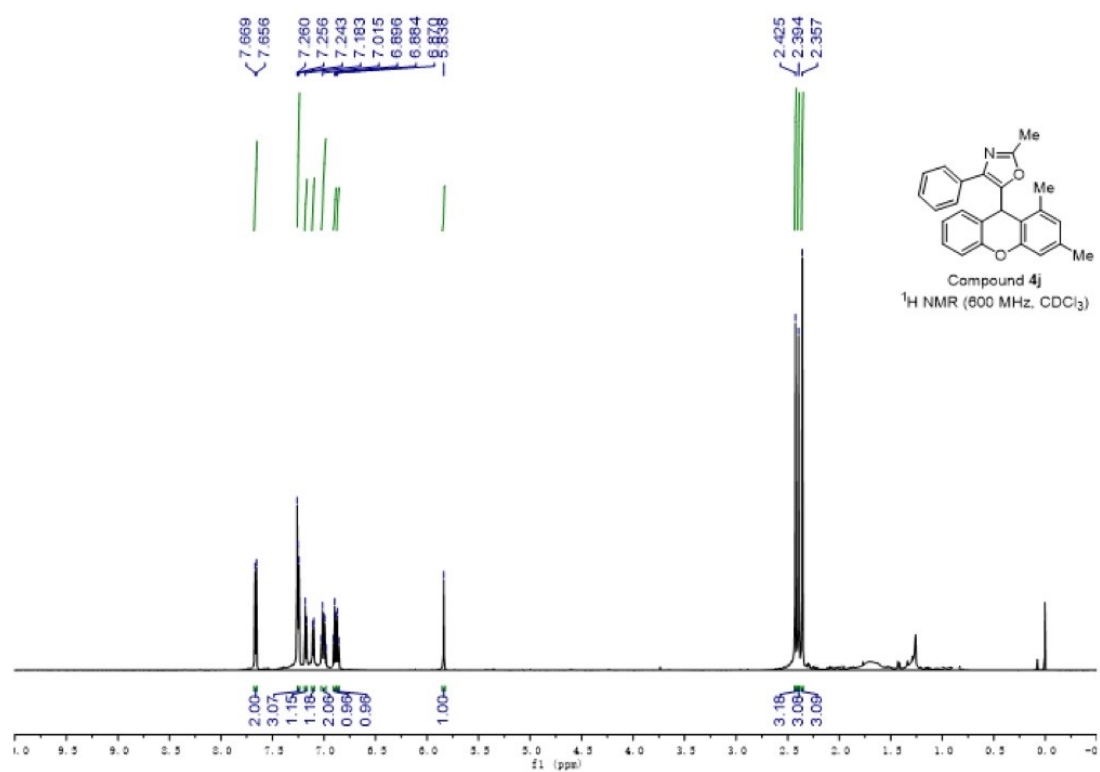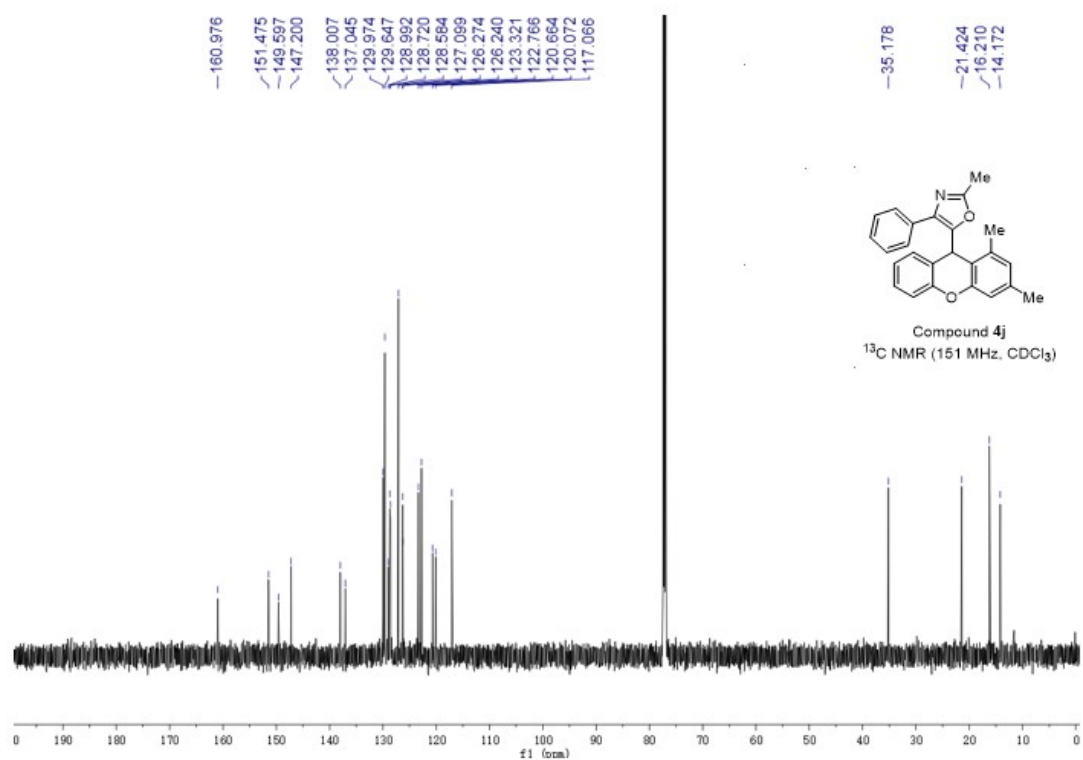

NMR spectra of 2-Methyl-5-(10-methyl-12H-benzo[a]xanthen-12-yl)-4-phenyloxazole (**4k**)

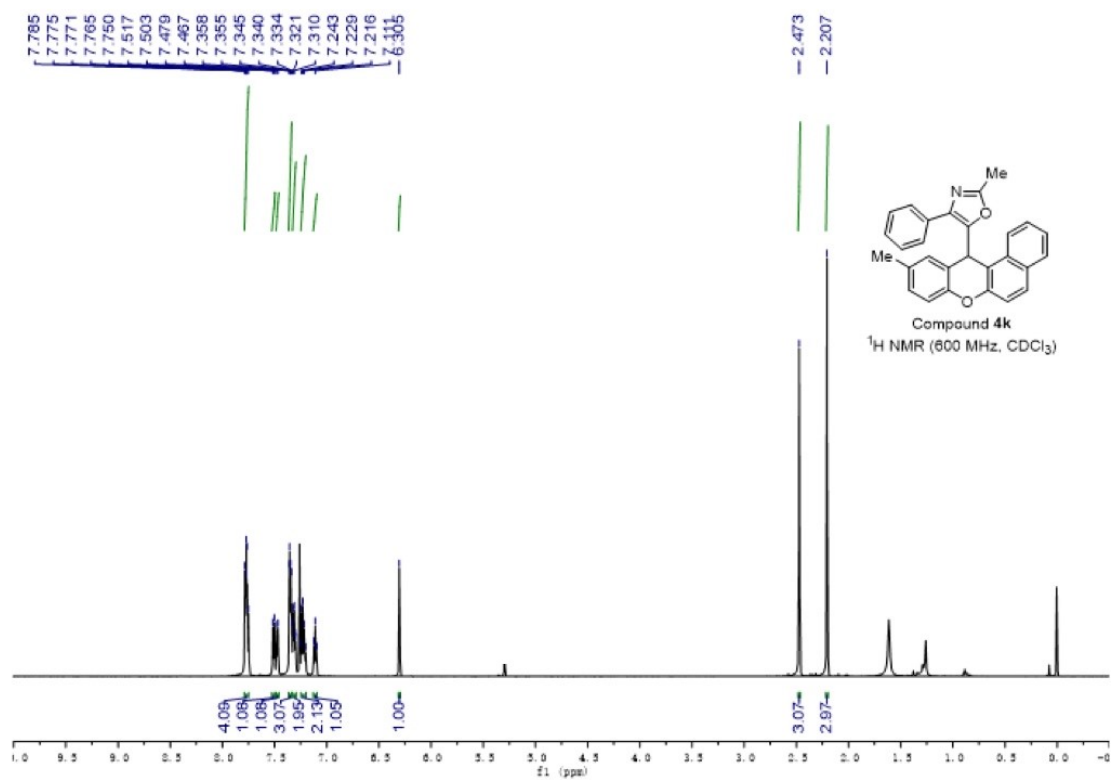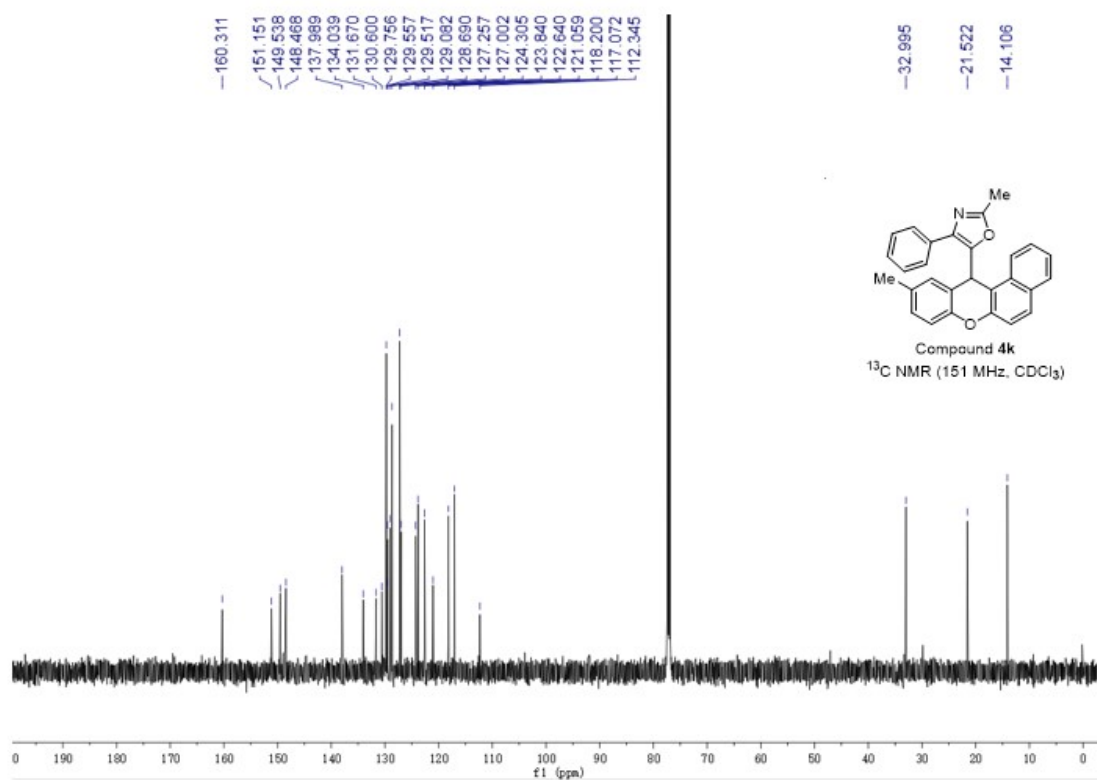

NMR spectra of 5-(7*H*-benzo[*c*]xanthen-7-yl)-2-methyl-4-phenyloxazole (**4l**)

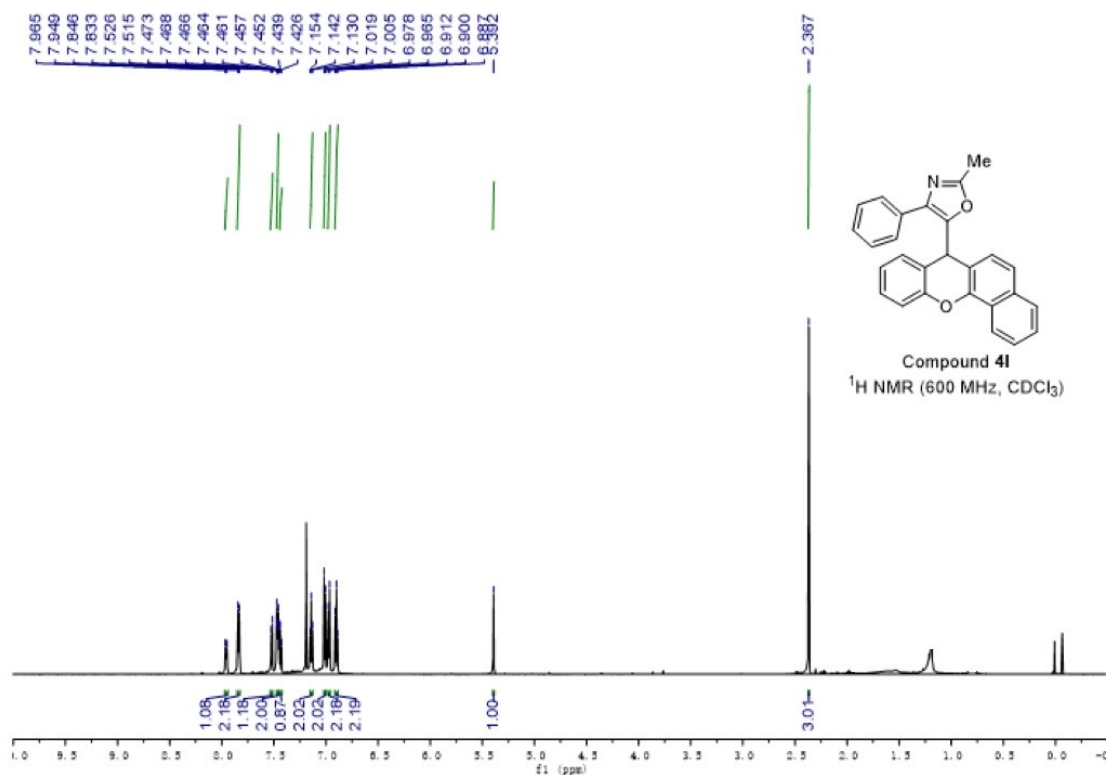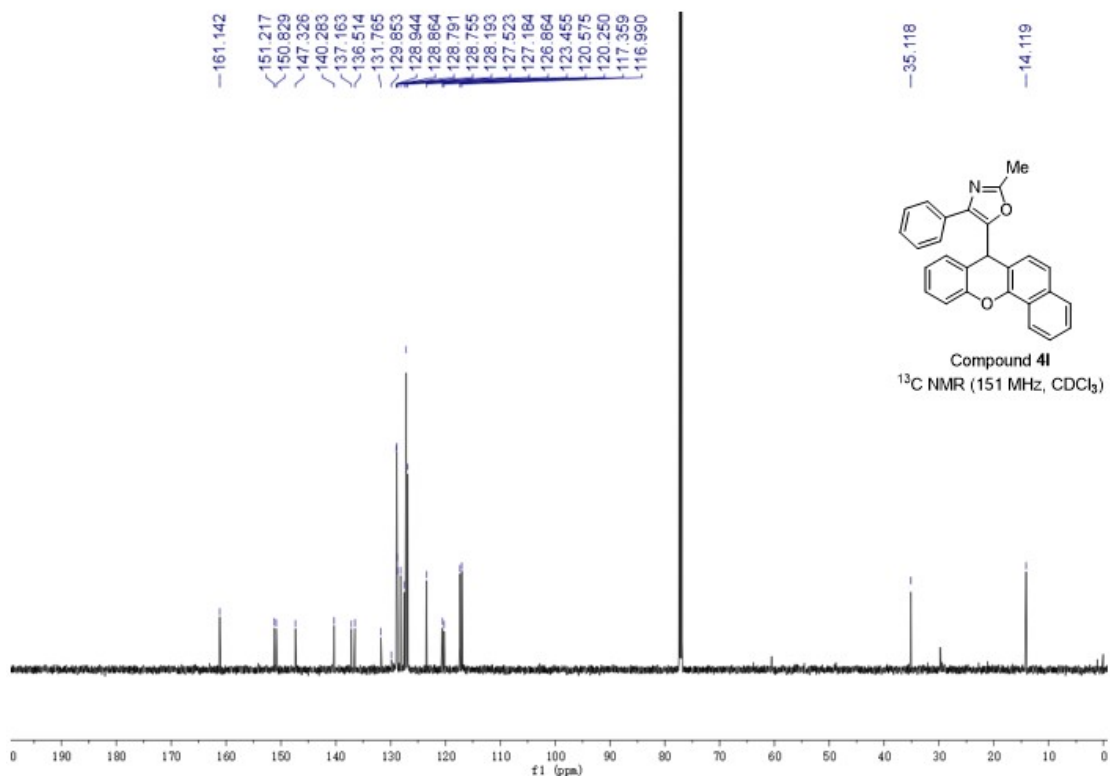

NMR spectra of 5-(12*H*-benzo[*a*]xanthen-12-yl)-2-methyl-4-phenyloxazole (**4m**)



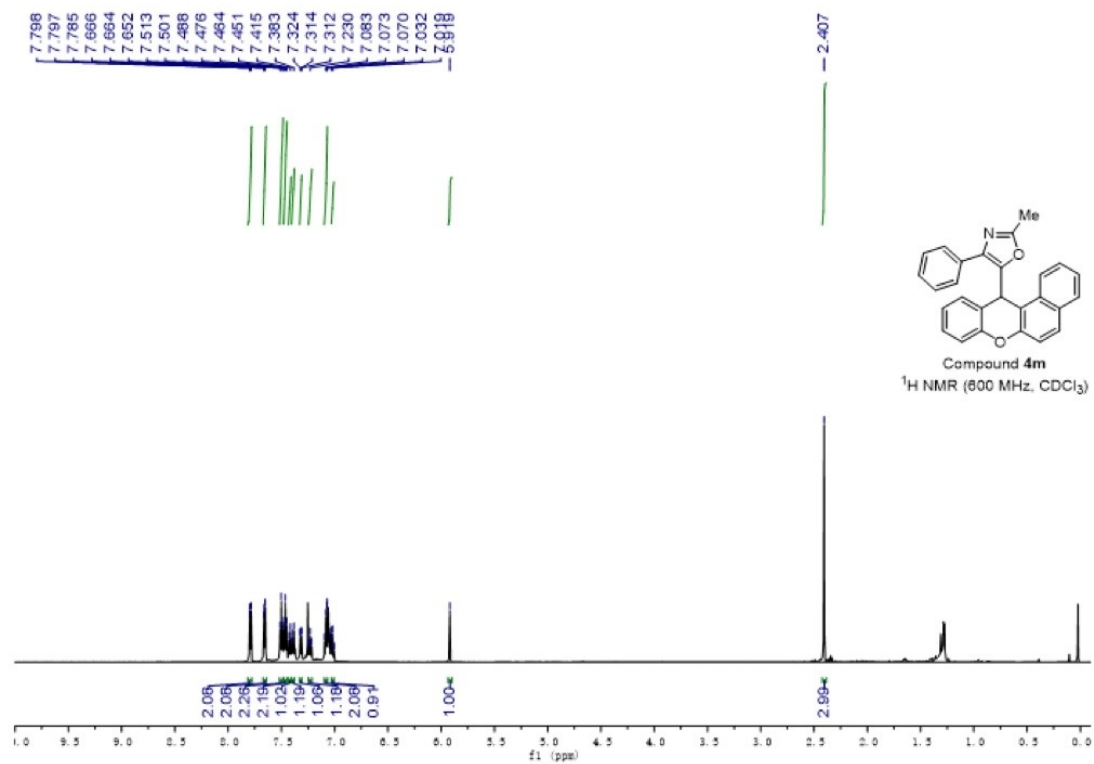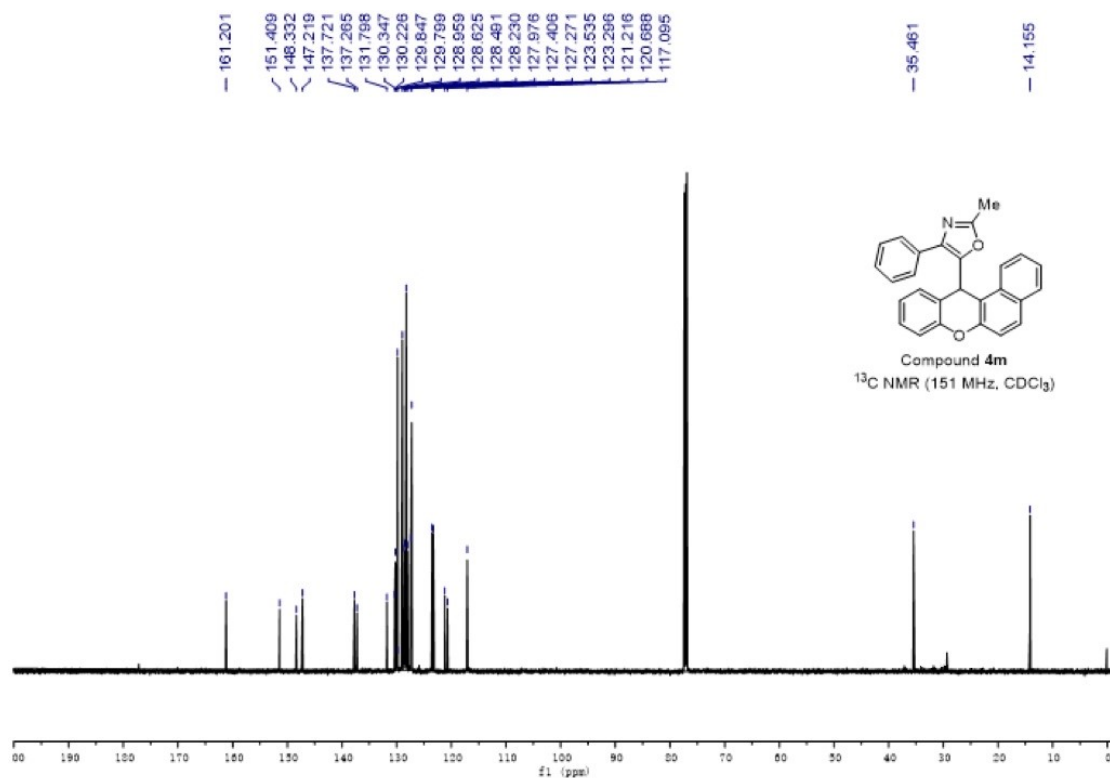

NMR spectra of 2-Methyl-5-(2-methyl-9H-thioxanthen-9-yl)-4-phenyloxazole (**4n**)

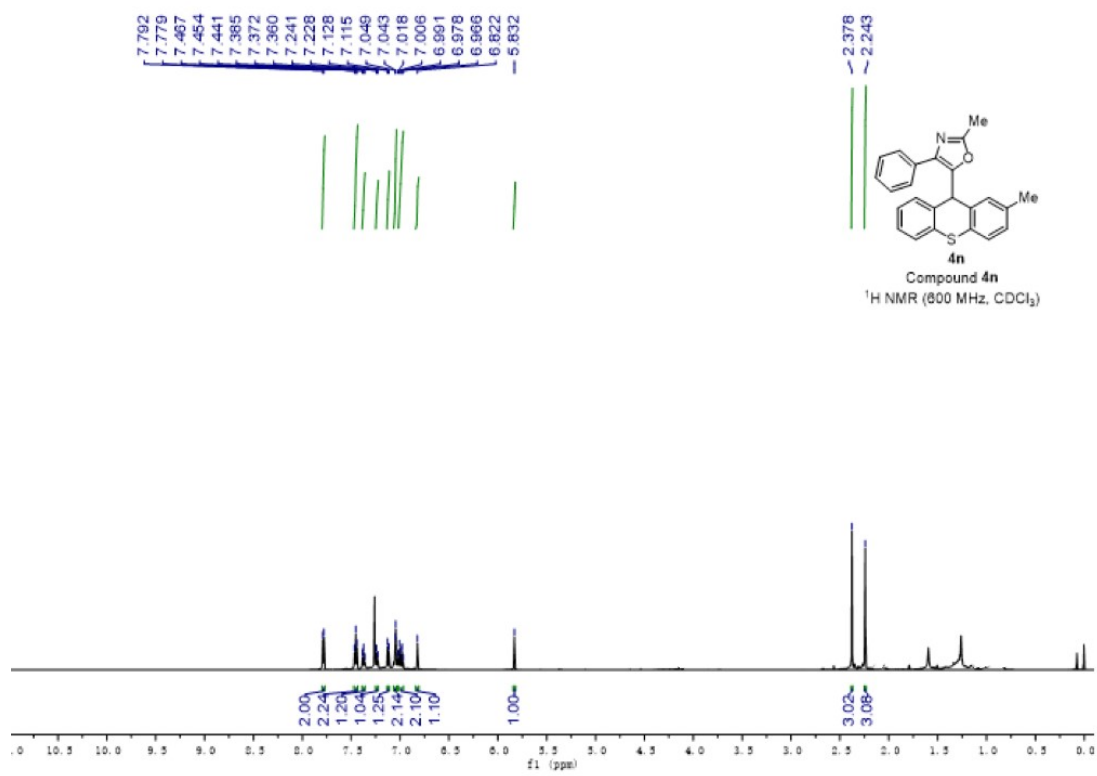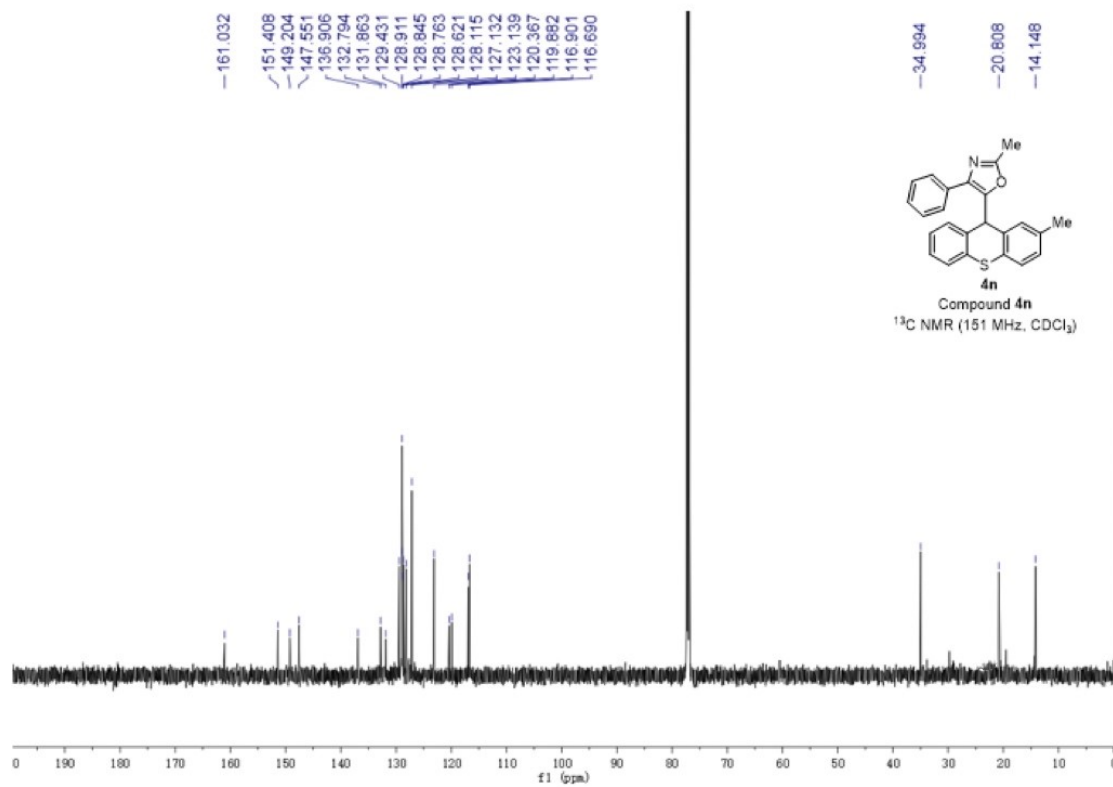

NMR spectra of 2-Methyl-4-phenyl-5-(9H-thioxanthen-9-yl)oxazole (**4o**)

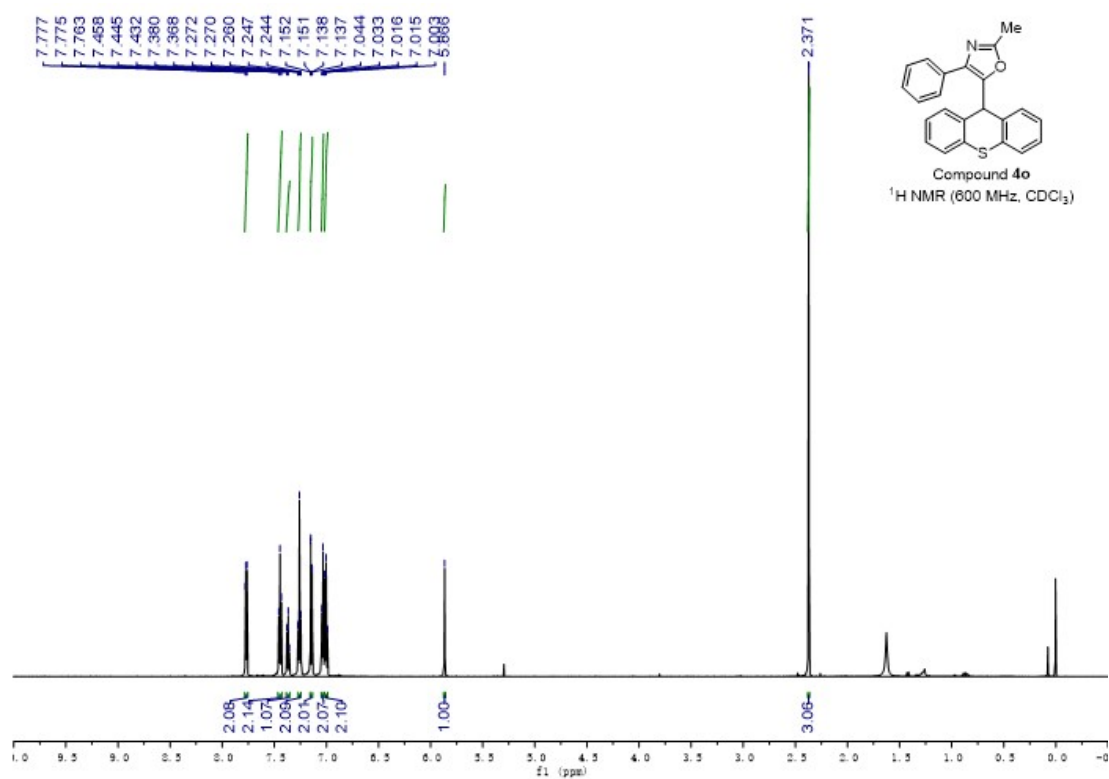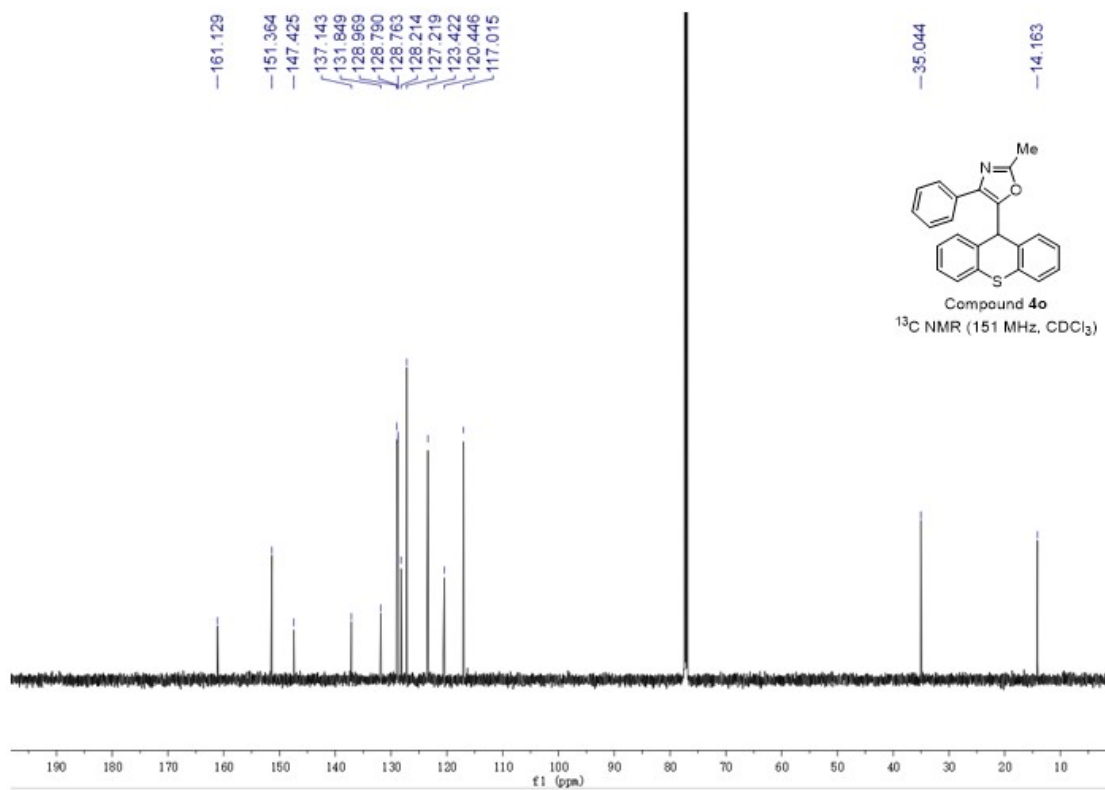

NMR spectra of 4-Phenyl-2-propyl-5-(9*H*-xanthen-9-yl)oxazole (**5a**)

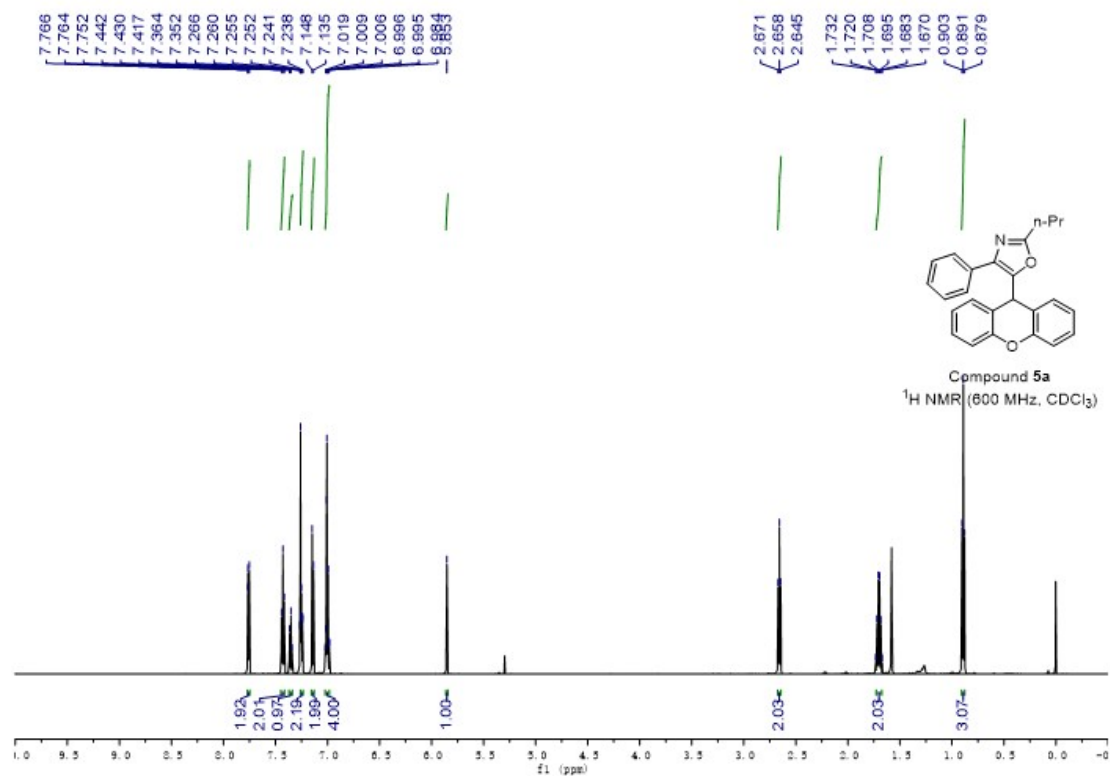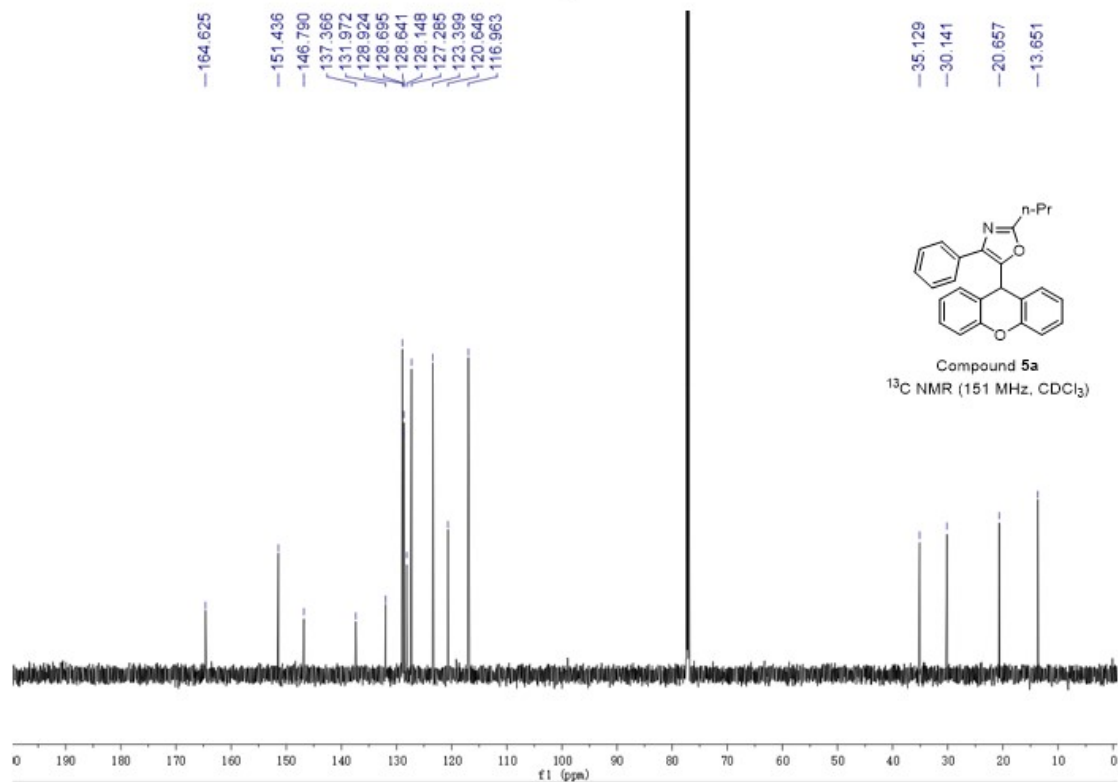

NMR spectra of 2-Butyl-4-phenyl-5-(9H-xanthen-9-yl)oxazole (**5b**)

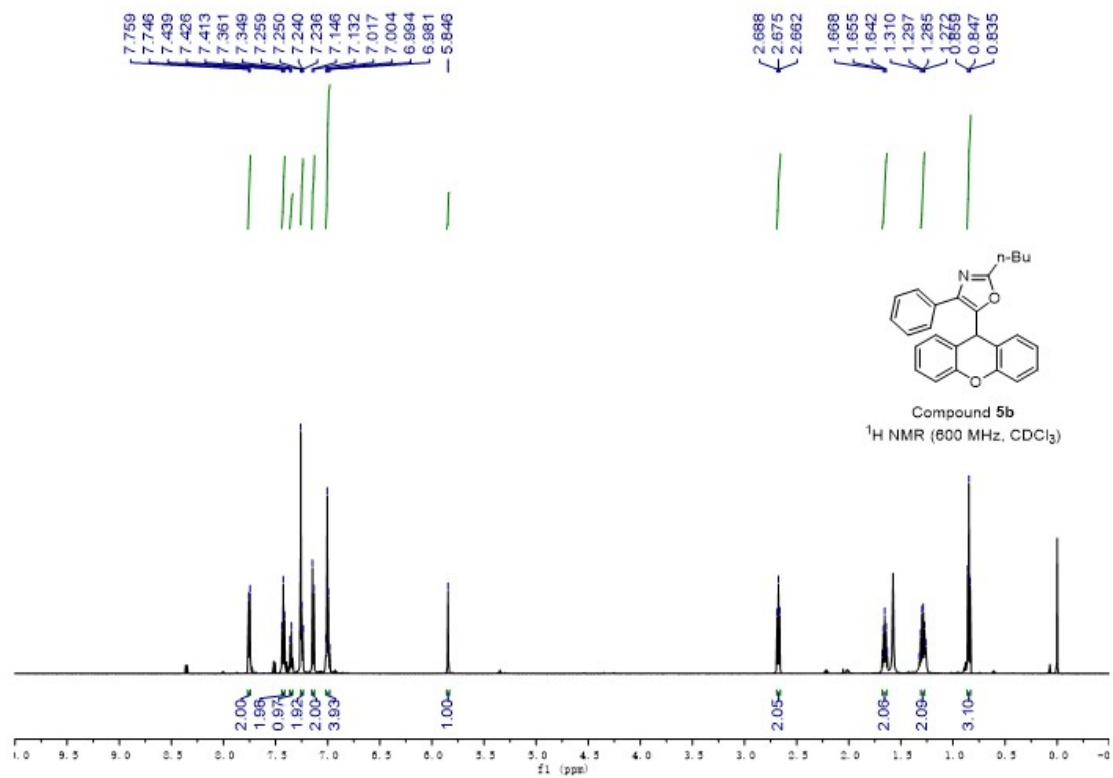

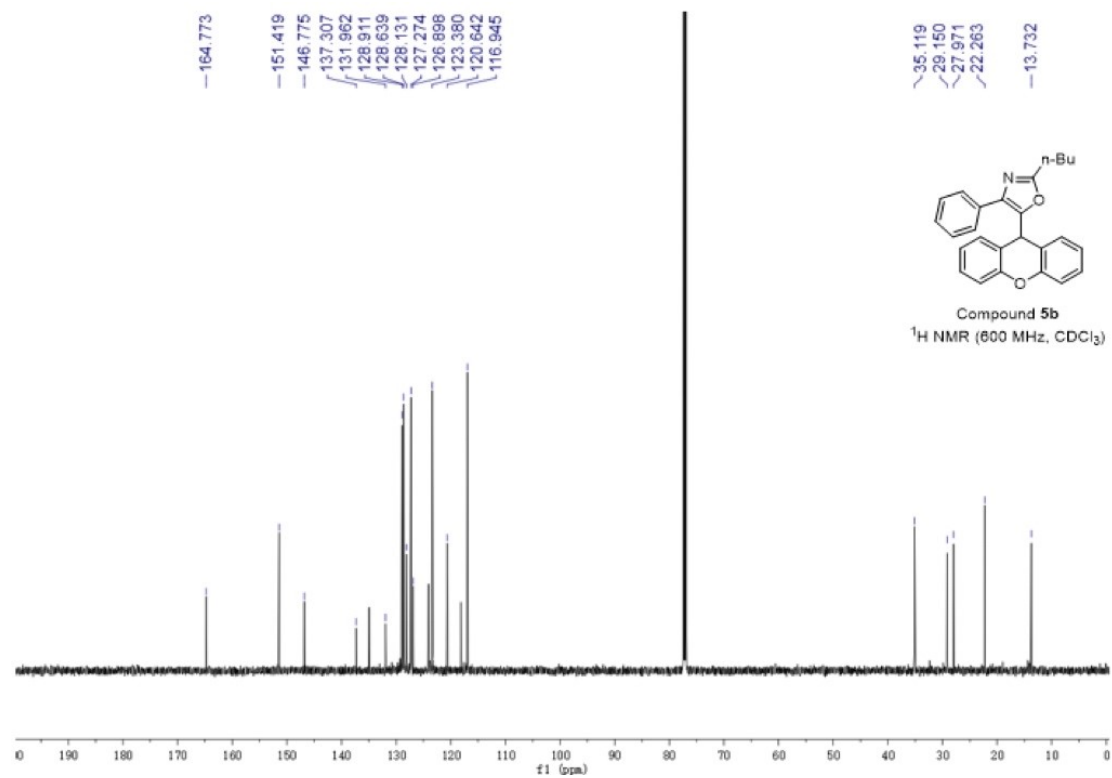

NMR spectra of 2-Cyclopropyl-4-phenyl-5-(9*H*-xanthen-9-yl)oxazole (**5c**)

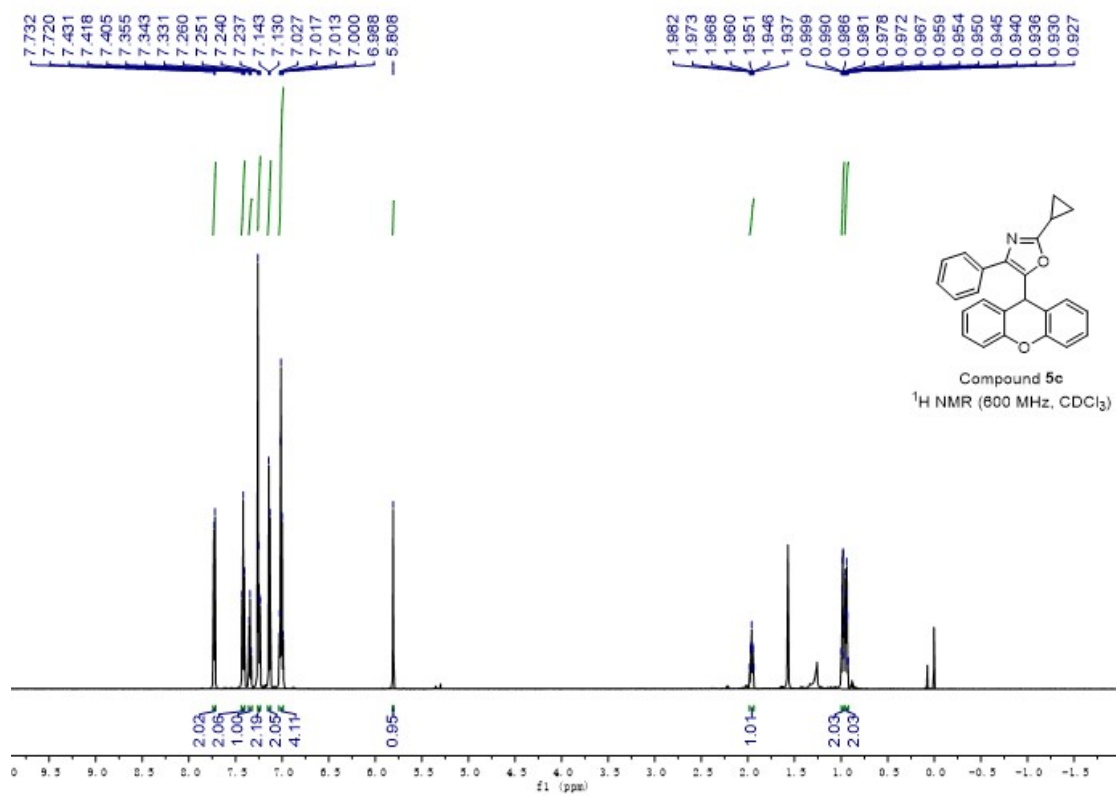

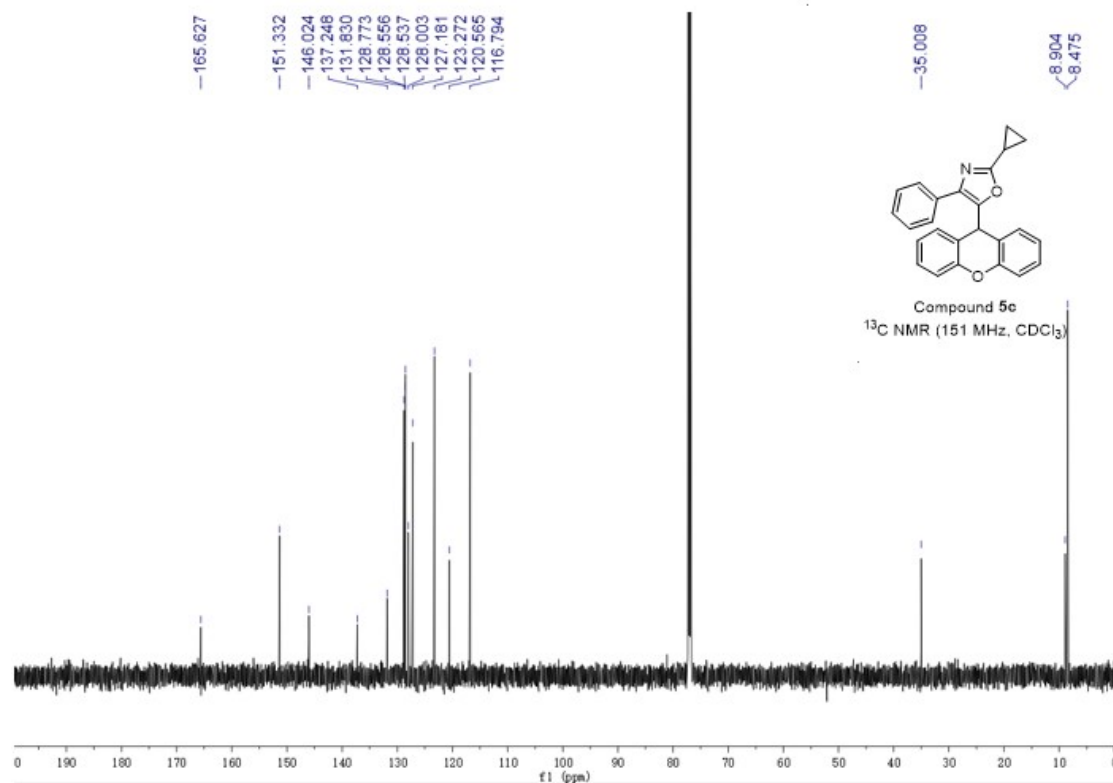

## 7. Crystallographic Data for **3n**

The compound **3n** was crystallized over a solution of **3n** (50 mg) in  $\text{CH}_2\text{Cl}_2$ /petroleum (1 mL/1 mL) at room temperature. The mixed solvent spontaneously evaporates in open air to obtain the crystals of **3n**. Then the crystals were carefully collected and used for X-ray diffraction analysis. The crystal structure was further determined by Bruker D8 QUEST X-ray single crystal diffractometer. The CCDC number of **3n** is 2157488.

## checkCIF/PLATON report

Structure factors have been supplied for datablock(s) 2

THIS REPORT IS FOR GUIDANCE ONLY. IF USED AS PART OF A REVIEW PROCEDURE FOR PUBLICATION, IT SHOULD NOT REPLACE THE EXPERTISE OF AN EXPERIENCED CRYSTALLOGRAPHIC REFEREE.

No syntax errors found. CIF dictionary Interpreting this report

### Datablock: 2

Bond precision: C-C = 0.0019 Å Wavelength=0.71073  
Cell: a=8.998 (3) b=13.804 (4) c=14.731(4)  
alpha=90 beta=92.647 (10) gamma=90  
Temperature: 273 K

|                        | Calculated   | Reported     |
|------------------------|--------------|--------------|
| Volume                 | 1827.8(9)    | 1827.9(9)    |
| Space group            | P 21/c       | P 1 21/c 1   |
| Hall group             | -P 2ybc      | -P 2ybc      |
| Moiety formula         | C24 H19 N O3 | C24 H19 N O3 |
| Sum formula            | C24 H19 N O3 | C24 H19 N O3 |
| Mr                     | 369.40       | 369.40       |
| Dx, g cm <sup>-3</sup> | 1.342        | 1.342        |
| Z                      | 4            | 4            |
| Mu (mm <sup>-1</sup> ) | 0.089        | 0.089        |
| F000                   | 776.0        | 776.0        |
| F000'                  | 776.36       |              |
| h, k, lmax             | 11, 18, 19   | 11, 17, 19   |
| Nref                   | 4268         | 4241         |
| Tmin, Tmax             | 0.988, 0.991 | 0.727, 0.746 |
| Tmin'                  | 0.988        |              |

Correction method= # Reported T Limits: Tmin=0.727 Tmax=0.746  
AbsCorr = NONE

Data completeness= 0.994 Theta(max)= 27.654

R(reflections)= 0.0401 ( 3453) wR2(reflections)=  
S = 1.057 Npar= 257 0.1142 ( 4241)

Datablock 2 - ellipsoid plot

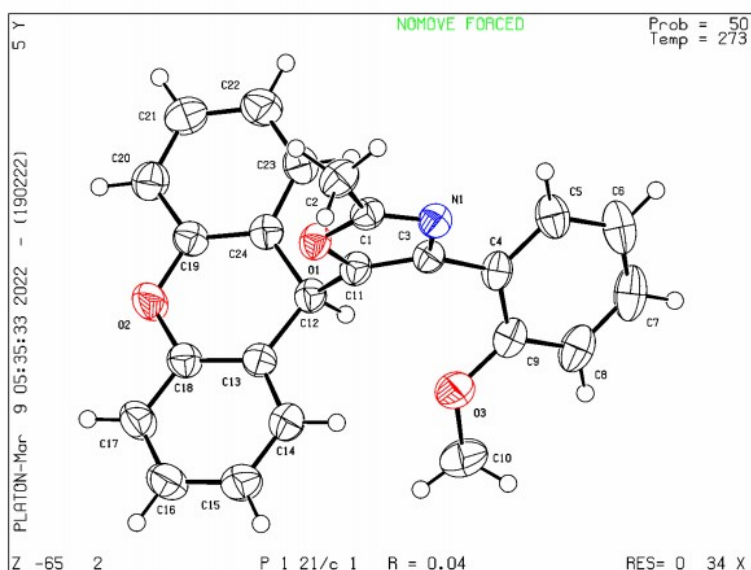

Figure S7 X-ray structure of **3n** (ORTEP diagram with ellipsoid contour 50% probability)



## 8. Determination of the Faradaic Efficiency

$$\begin{aligned} \text{F.E.(\%)} &= \frac{n \times F \times \text{mol of product or intermediate formed}}{\text{accumulated charge (C)}} \times 100 \% \\ &= \frac{4 \times 96485 \text{ C mol}^{-1} \times 0.3 \text{ mmol} \times 10^{-3} \times 79 \%}{5 \text{ mA} \times 10^{-3} \times 10 \text{ h} \times 3600} \times 100 \% \\ &= 50.8\% \end{aligned}$$

The F.E. (%) of the product **3a** was calculated by (1). The F.E. is the proportion of electrons consumed in each electrochemical reaction of the total applied charge and represents the selectivity of the electrochemical system for each reaction. In Eq (1), F is the Faradaic constant (96485 C mol<sup>-1</sup>), and n is the number of electrons required for the production of products. The yield is the proportion of reactant converted to target product.
